# Supplementary material for: Fluorinated 2,6-bis(arylimino)pyridyl iron complexes targeting bimodal dispersive polyethylenes: probing chain termination pathways via a combined experimental and DFT study
Source: Royal Society of Chemistry journal article supplement (doi:10.1039/d2dt00868h), 2022-01-01
Supplement: d2dt00868h1.pdf [file d2dt00868h1.pdf]

Supporting information for

**Fluorinated 2,6-Bis(imino)pyridyl Iron Complexes Targeting Bimodal Dispersive Polyethylene; probing chain termination pathway via a combined experimental and DFT study**

Qiuyue Zhang,<sup>a,b</sup> Zheng Zuo,<sup>a,b</sup> Yanping Ma,<sup>a</sup> Tongling Liang,<sup>a</sup> Xinzheng Yang,<sup>\*</sup> and Wen-Hua Sun<sup>a,b\*</sup>

<sup>a</sup> Key Laboratory of Engineering Plastics and Beijing National Laboratory for Molecular Sciences, Institute of Chemistry, Chinese Academy of Sciences, Beijing 100190, China. E-mail: whsun@iccas.ac.cn

<sup>b</sup> CAS Research/Education Center for Excellence in Molecular Sciences, University of Chinese Academy of Sciences, Beijing 100049, China.

| <b>Table of Contents</b>                                                                                                    | <b>Page</b> |
|-----------------------------------------------------------------------------------------------------------------------------|-------------|
| <b>Figure S1.</b> FT-IR spectrum of <b>Fe1</b> .                                                                            | 3           |
| <b>Figure S2.</b> FT-IR spectrum of <b>Fe2</b> .                                                                            | 3           |
| <b>Figure S3.</b> FT-IR spectrum of <b>Fe3</b> .                                                                            | 3           |
| <b>Figure S4.</b> FT-IR spectrum of <b>Fe4</b> .                                                                            | 4           |
| <b>Figure S5.</b> FT-IR spectrum of <b>Fe5</b> .                                                                            | 4           |
| <b>Figure S6.</b> FT-IR spectrum of <b>Fe6</b> .                                                                            | 4           |
| <b>Figure S7.</b> <sup>1</sup> H NMR spectrum of <b>Fe1</b> (recorded in CDCl <sub>3</sub> at ambient temperature).         | 5           |
| <b>Figure S8.</b> <sup>1</sup> H NMR spectrum of <b>Fe3</b> (recorded in CDCl <sub>3</sub> at ambient temperature).         | 5           |
| <b>Figure S9.</b> <sup>1</sup> H NMR spectrum of <b>Fe4</b> (recorded in CDCl <sub>3</sub> at ambient temperature).         | 6           |
| <b>Figure S10.</b> <sup>1</sup> H NMR spectrum of <b>Fe5</b> (recorded in CDCl <sub>3</sub> at ambient temperature).        | 6           |
| <b>Figure S11.</b> <sup>1</sup> H NMR spectrum of <b>Fe6</b> (recorded in CDCl <sub>3</sub> at ambient temperature).        | 7           |
| <b>Figure S12.</b> <sup>19</sup> F NMR spectra of <b>Fe1–Fe6</b> ; recorded in CDCl <sub>3</sub> at ambient temperature.    | 7           |
| <b>Figure S13.</b> X-ray crystal structural drawing showing ADPs of <b>Fe2</b> (left) and <b>Fe3</b> (right) made by Olex2. | 8           |

|                                                                                                                                                                                                                                                                                            |    |
|--------------------------------------------------------------------------------------------------------------------------------------------------------------------------------------------------------------------------------------------------------------------------------------------|----|
| <b>Figure S14.</b> Activity and $M_w$ as a function of reaction temperature (a); GPC curves of the obtained polyethylene at different run temperatures (b) for the <b>Fe2/MMAO</b> system (entries 1–6, Table 2).                                                                          | 8  |
| <b>Figure S15.</b> Activity and $M_w$ as a function of reaction time (a); GPC curves of the obtained polyethylene at different run time (b) for the <b>Fe2/MMAO</b> system (entries 8, 11–14, Table 2).                                                                                    | 9  |
| <b>Figure S16.</b> Catalytic activities and molecular weight of resultant polyethylenes by <b>Fe1–Fe6/MMAO</b> (entries 8, 17–21, Table 2).                                                                                                                                                | 9  |
| <b>Figure S17.</b> $^1\text{H}$ NMR spectrum of the polyethylene prepared with catalyst <b>Fe1/MMAO</b> at 70 °C (entry 17, Table 2).                                                                                                                                                      | 10 |
| <b>Figure S18.</b> $^1\text{H}$ NMR spectrum of the polyethylene prepared with catalyst <b>Fe6/MMAO</b> at 70 °C (entry 21, Table 2).                                                                                                                                                      | 10 |
| <b>Figure S19.</b> Activity and $M_w$ as a function of reaction temperature (a); GPC curves of the obtained polyethylene at different run temperatures (b) for the <b>Fe2/MAO</b> system (entries 1–6, Table 3).                                                                           | 11 |
| <b>Figure S20.</b> Activity and $M_w$ as a function of reaction time (a); GPC curves of the obtained polyethylene at different run time (b) for the <b>Fe2/MAO</b> system (entries 10, 12–15, Table 3).                                                                                    | 11 |
| <b>Figure S21.</b> Catalytic activities and molecular weight of resultant polyethylenes by <b>Fe1–Fe6/MAO</b> (entries 10, 17–21, Table 3).                                                                                                                                                | 12 |
| <b>Figure S22.</b> $^1\text{H}$ NMR spectrum of the polyethylene prepared with catalyst <b>Fe1/MAO</b> at 70 °C (entry 17, Table 3).                                                                                                                                                       | 12 |
| <b>Figure S23.</b> $^1\text{H}$ NMR spectrum of the polyethylene prepared with catalyst <b>Fe6/MAO</b> at 70 °C (entry 21, Table 3).                                                                                                                                                       | 13 |
| <b>Figure S24.</b> 1D sequence inverse-gated decoupled $^{13}\text{C}$ NMR spectrum of the polyethylene obtained using <b>Fe2/MAO</b> ( $\delta$ C 73.8, tetrachloroethane- $d_2$ ) (entry 10, Table 3).                                                                                   | 13 |
| <b>Figure S25.</b> Optimized structures of <b>2</b> , <b>TS<sub>2,3</sub></b> ( $287i$ $\text{cm}^{-1}$ ), <b>TS<sub>3,4</sub></b> ( $313i$ $\text{cm}^{-1}$ ), and <b>TS<sub>5,6</sub></b> ( $442i$ $\text{cm}^{-1}$ ). Mesitylene groups are omitted for clarity. Bond lengths are in Å. | 14 |
| <b>Table S1.</b> Calculation data of the optimized intermediates as well as their total electronic energy (E), total free energy (G), and total enthalpy (H).                                                                                                                              | 14 |
| <b>Table S2.</b> Crystal data and structure refinement for <b>Fe2</b> and <b>Fe3</b> .                                                                                                                                                                                                     | 15 |
| <b>General Considerations</b>                                                                                                                                                                                                                                                              | 16 |
| <b>Typical procedures for ethylene polymerization</b>                                                                                                                                                                                                                                      | 17 |
| <b>Computational part-</b> 1. Computational Details                                                                                                                                                                                                                                        | 18 |
| 2. Evaluation of density functionals                                                                                                                                                                                                                                                       | 19 |
| 3. Evaluation of spin states                                                                                                                                                                                                                                                               | 20 |
| 4. References                                                                                                                                                                                                                                                                              | 20 |
| 5. Atomic coordinates and solvent corrected absolute free energies of all optimized structures                                                                                                                                                                                             | 22 |

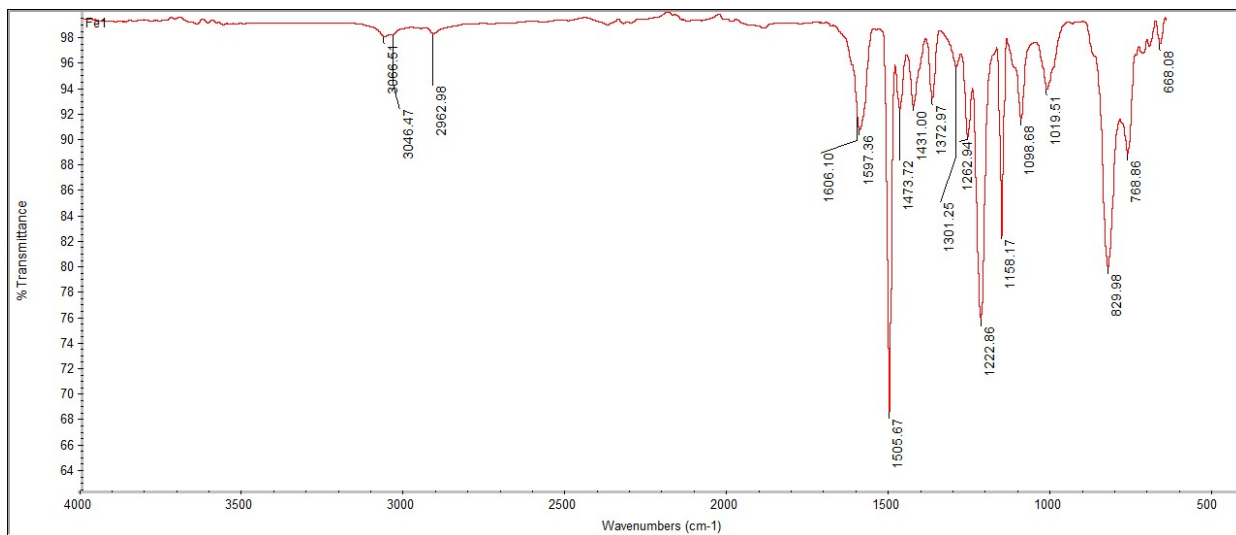

**Figure S1.** FT-IR spectrum of Fe1.

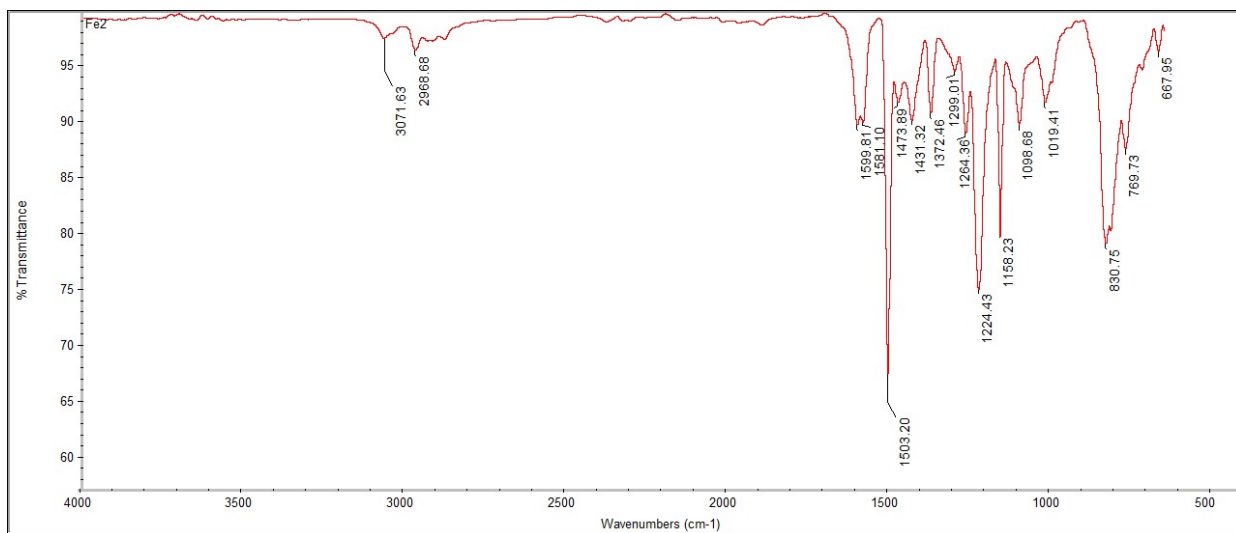

**Figure S2.** FT-IR spectrum of Fe2.

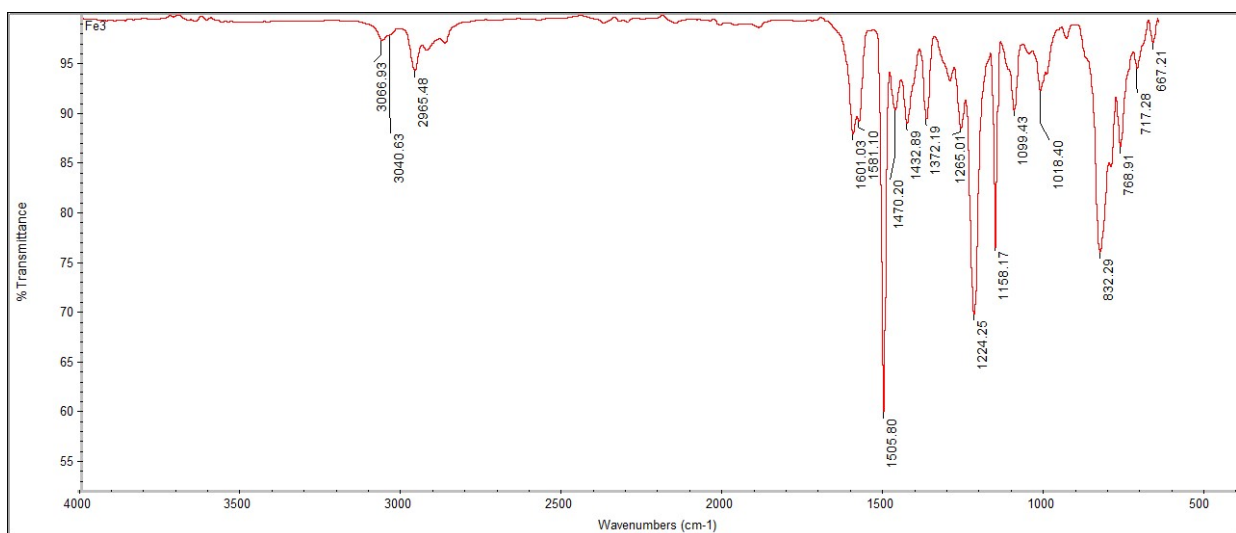

**Figure S3.** FT-IR spectrum of Fe3.

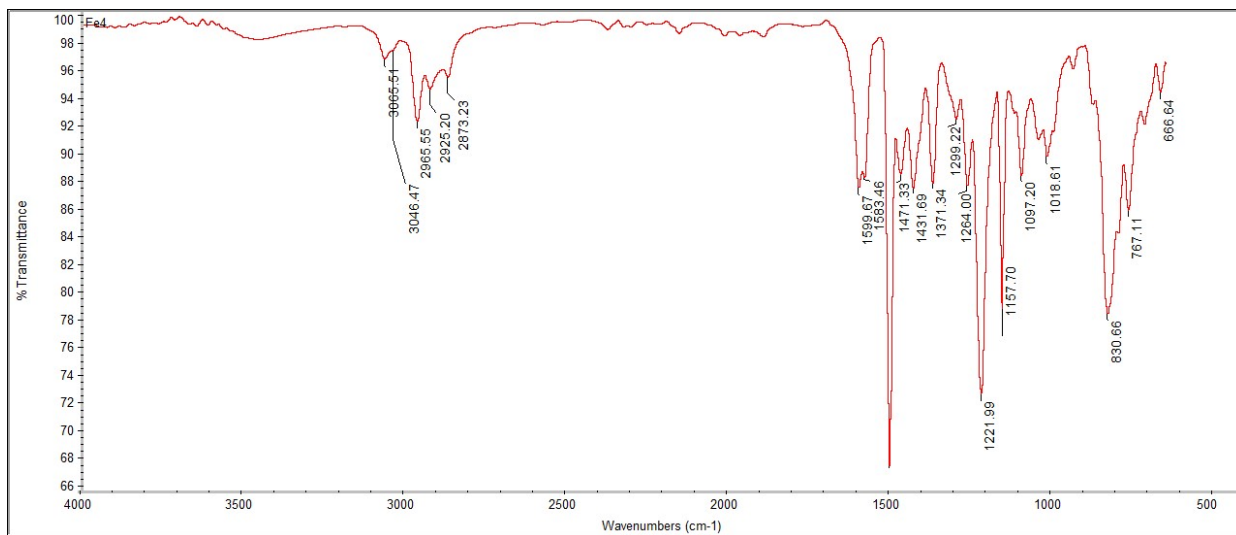

Figure S4. FT-IR spectrum of Fe4.

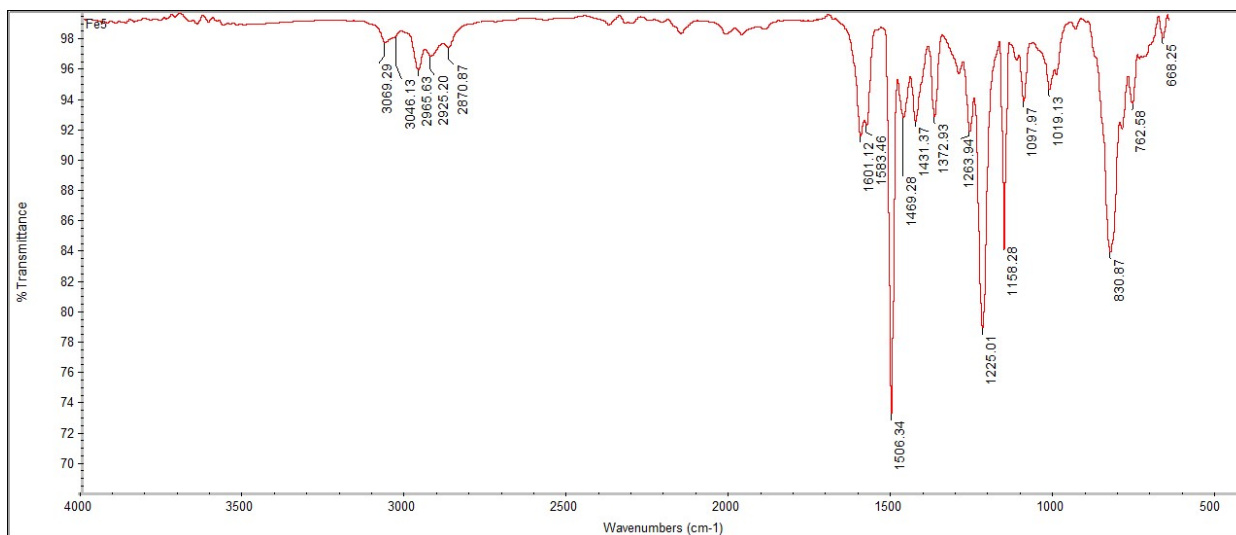

Figure S5. FT-IR spectrum of Fe5.

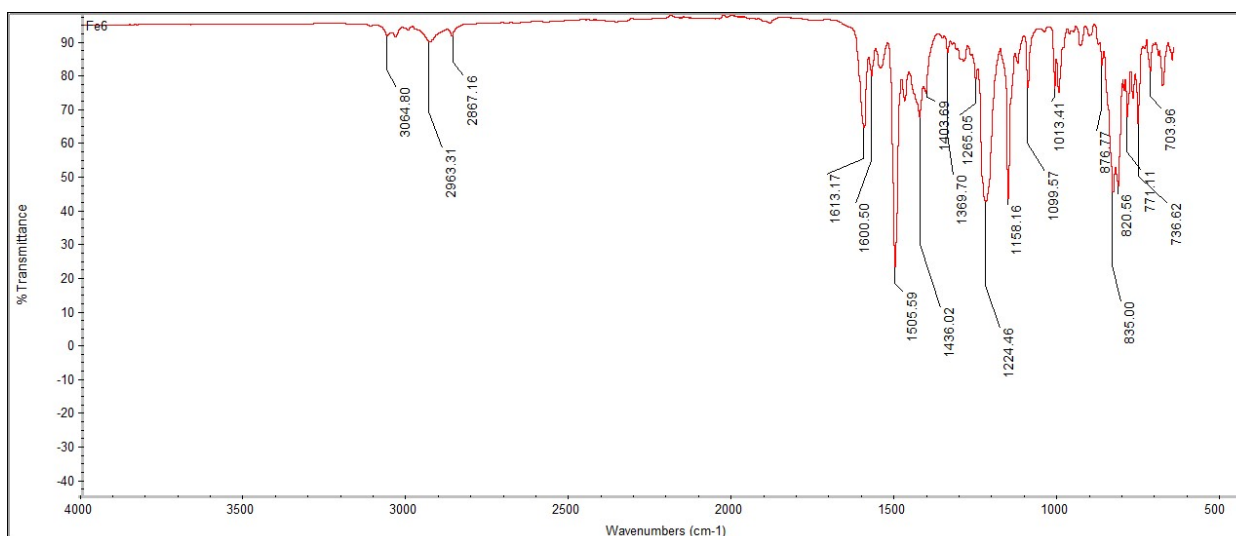

Figure S6. FT-IR spectrum of Fe6.

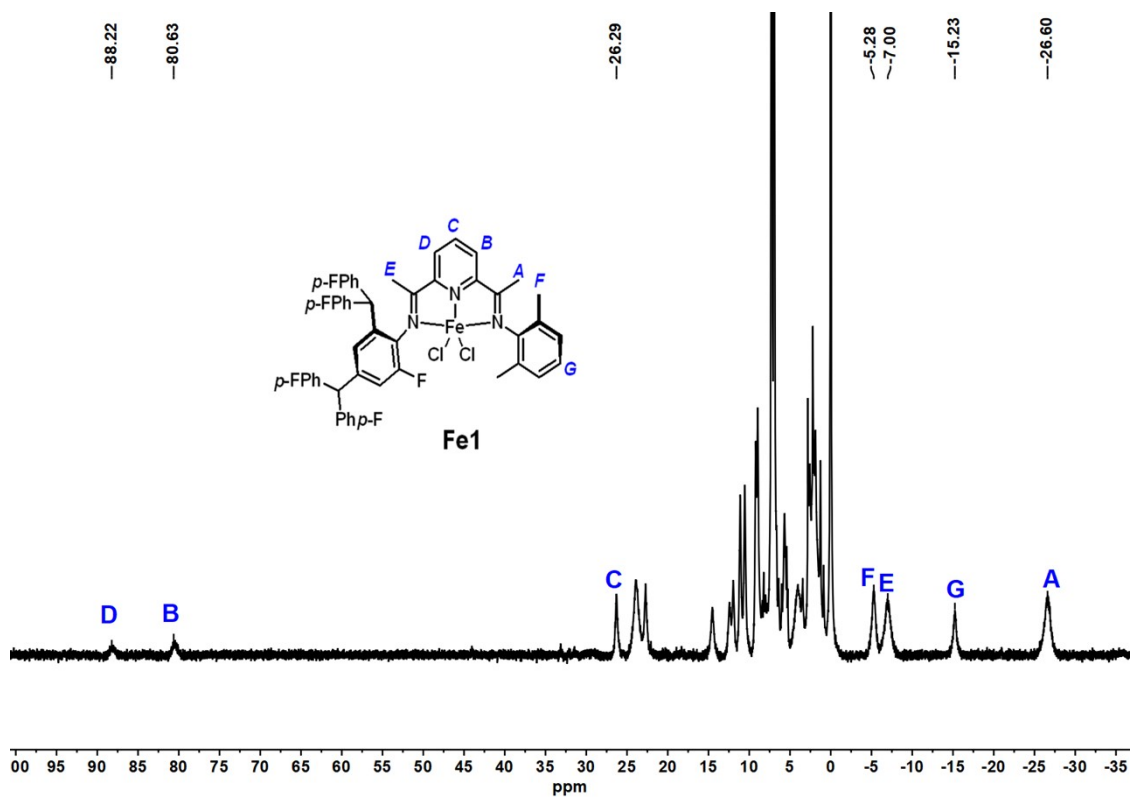

**Figure S7.**  $^1\text{H}$  NMR spectrum of **Fe1** (recorded in  $\text{CDCl}_3$  at ambient temperature).

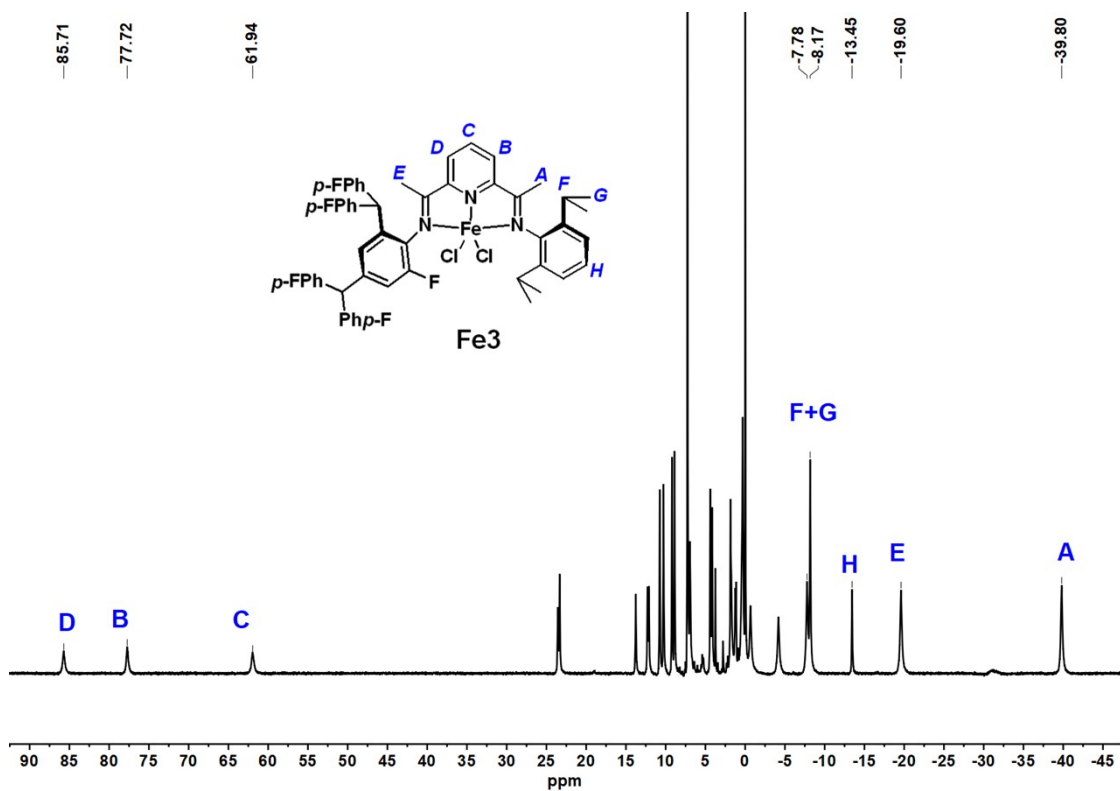

**Figure S8.**  $^1\text{H}$  NMR spectrum of **Fe3** (recorded in  $\text{CDCl}_3$  at ambient temperature).

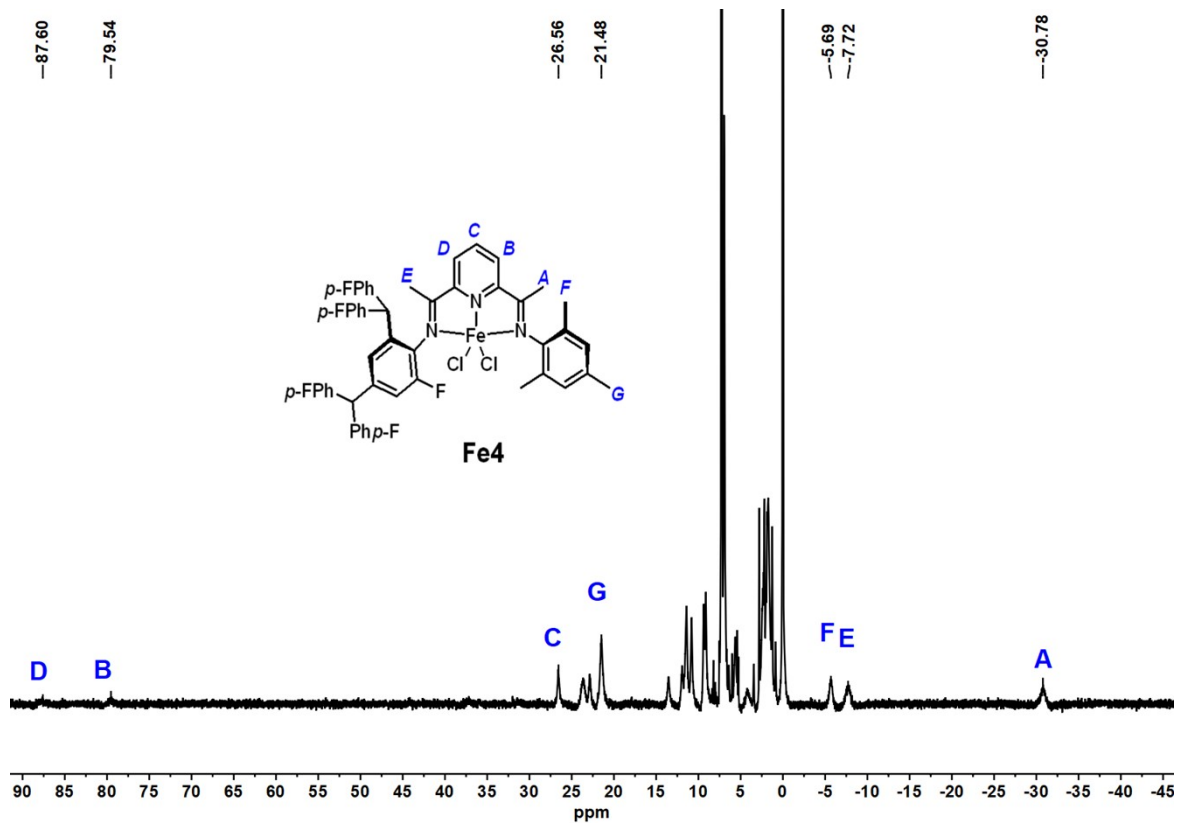

**Figure S9.** <sup>1</sup>H NMR spectrum of **Fe4** (recorded in CDCl<sub>3</sub> at ambient temperature).

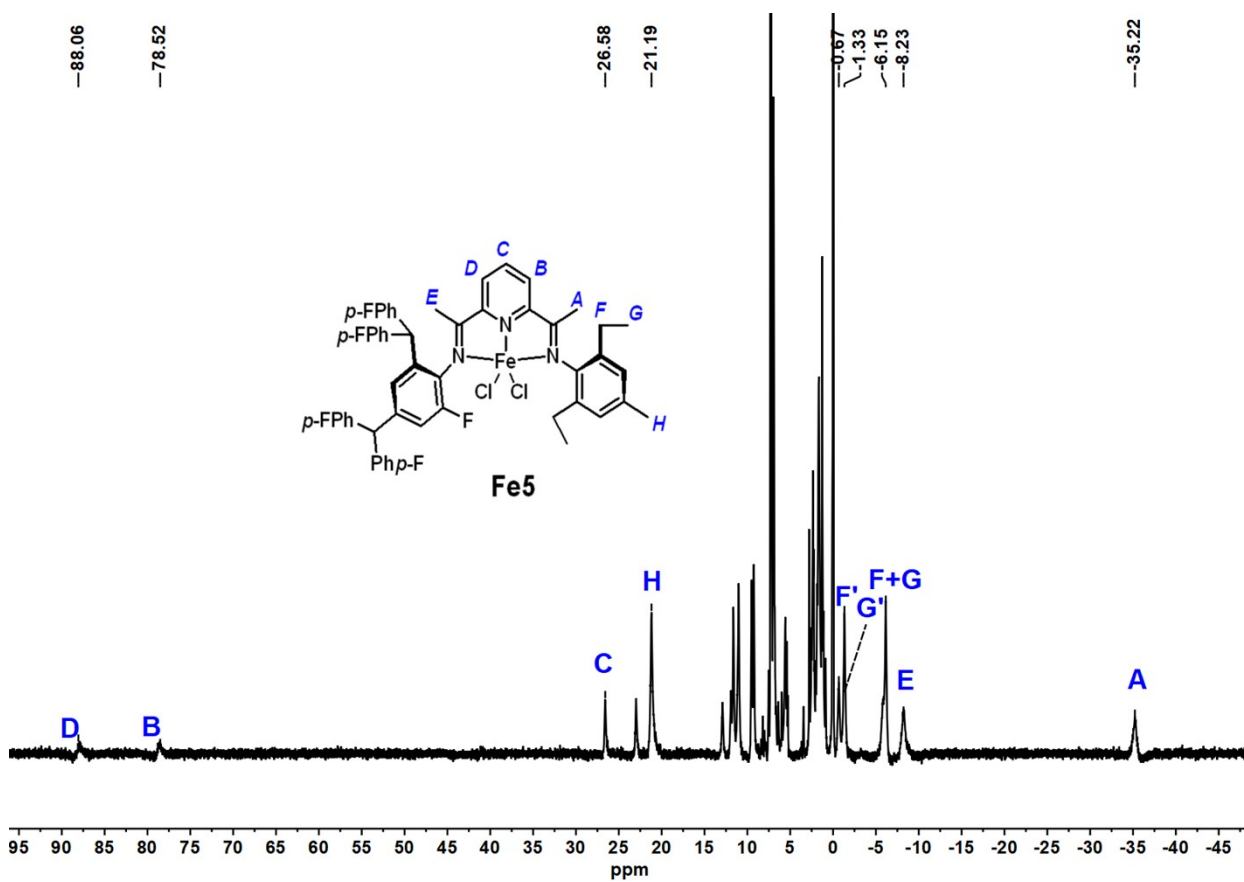

**Figure S10.** <sup>1</sup>H NMR spectrum of **Fe5** (recorded in CDCl<sub>3</sub> at ambient temperature).

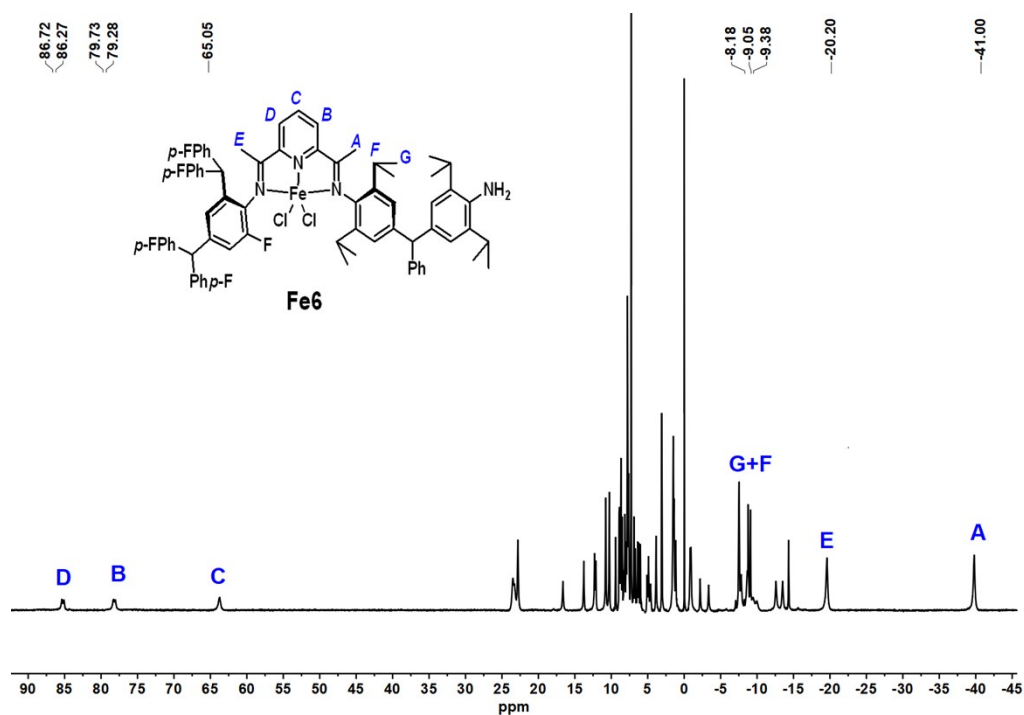

**Figure S11.**  $^1\text{H}$  NMR spectrum of **Fe6** (recorded in  $\text{CDCl}_3$  at ambient temperature).

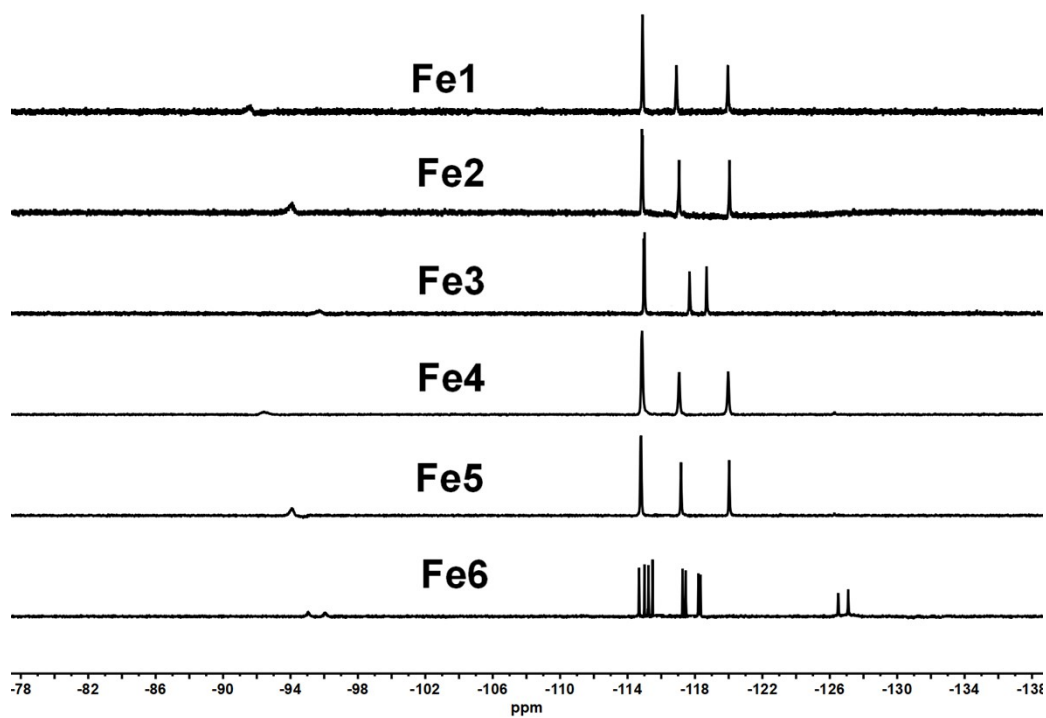

**Figure S12.**  $^{19}\text{F}$  NMR spectra of **Fe1**–**Fe6**; recorded in  $\text{CDCl}_3$  at ambient temperature.

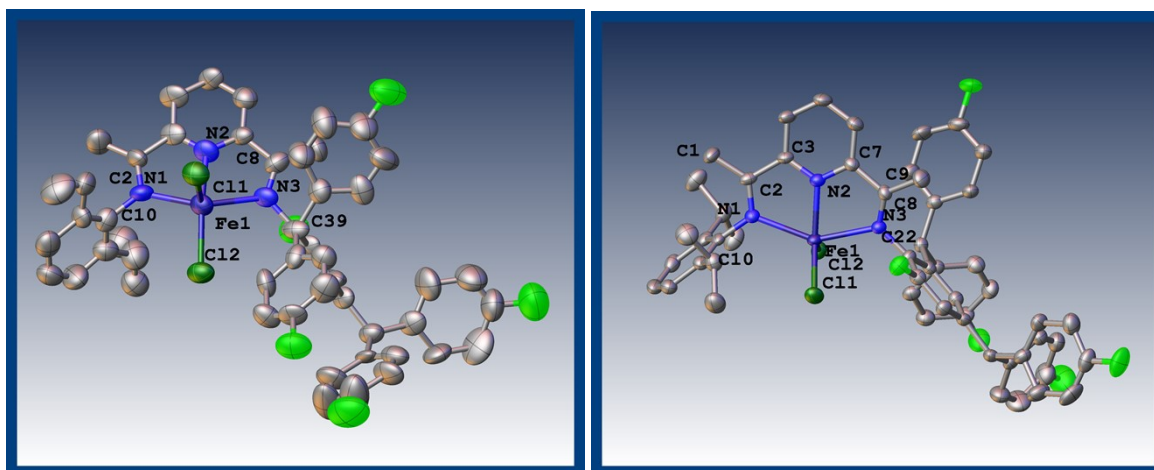

**Figure S13.** X-ray crystal structural drawing showing ADPs of Fe2 (left) and Fe3 (right) made by Olex2.

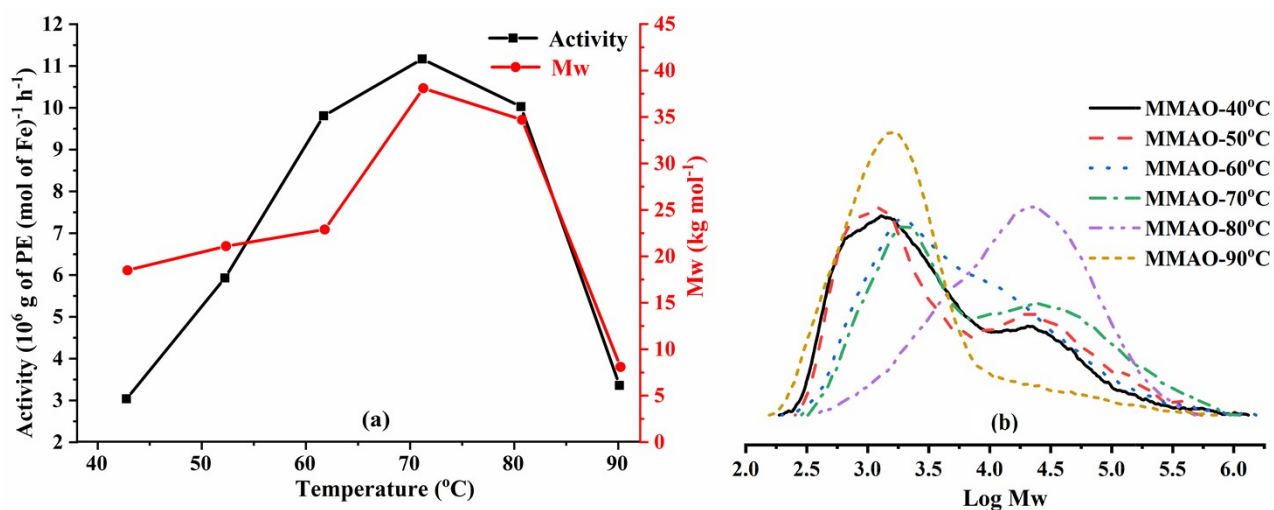

**Figure S14.** Activity and  $M_w$  as a function of reaction temperature (a); GPC curves of the obtained polyethylene at different run temperatures (b) for the Fe2/MMAO system (entries 1–6, Table 2).



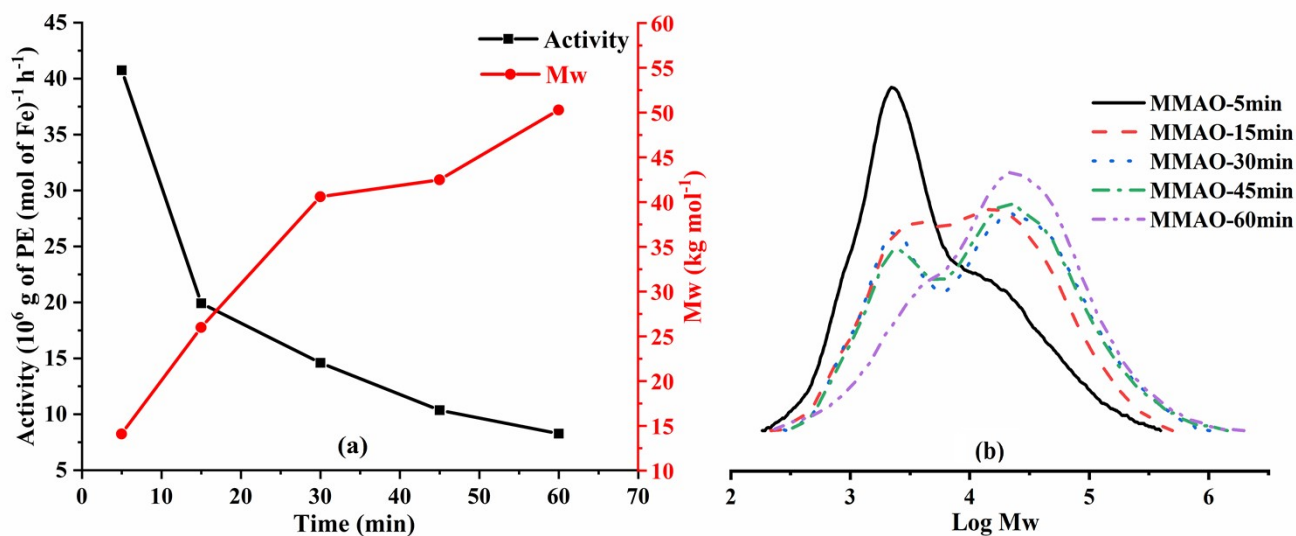

**Figure S15.** Activity and  $M_w$  as a function of reaction time (a); GPC curves of the obtained polyethylene at different run time (b) for the **Fe2/MMAO** system (entries 8, 11–14, Table 2).

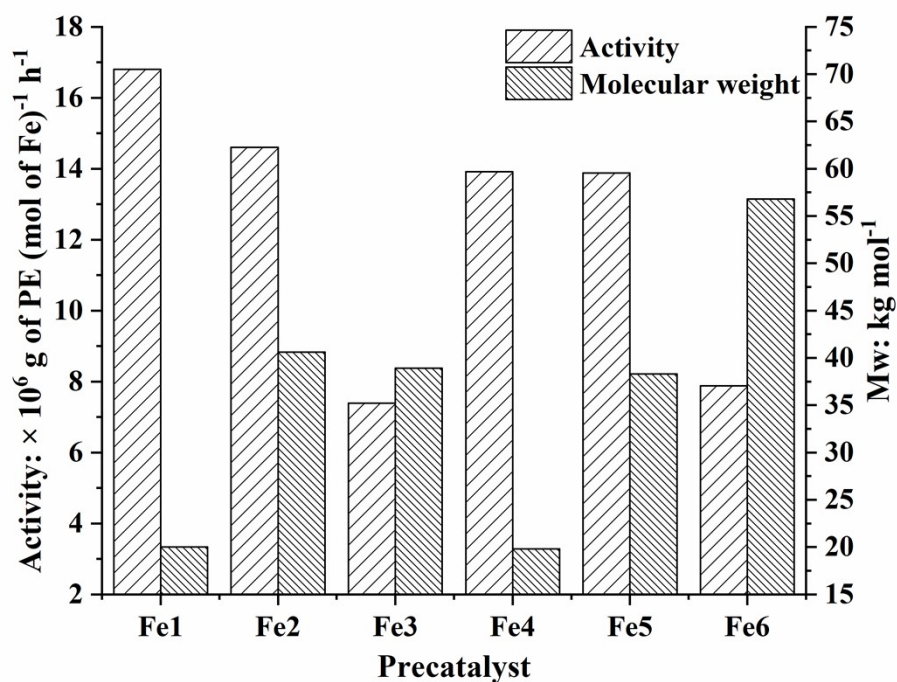

**Figure S16.** Catalytic activities and molecular weight of resultant polyethylenes by **Fe1–Fe6/MMAO** (entries 8, 17–21, Table 2).

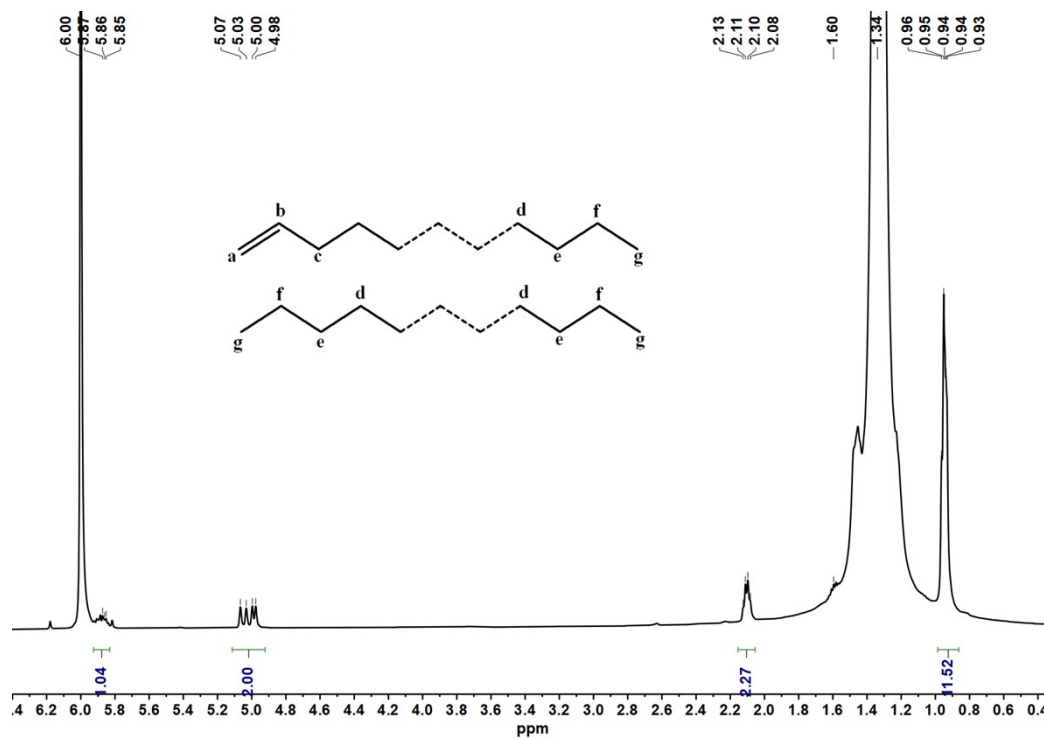

**Figure S17.** <sup>1</sup>H NMR spectrum of the polyethylene prepared with catalyst Fe1/MMAO at 70 °C (entry 17, Table 2).

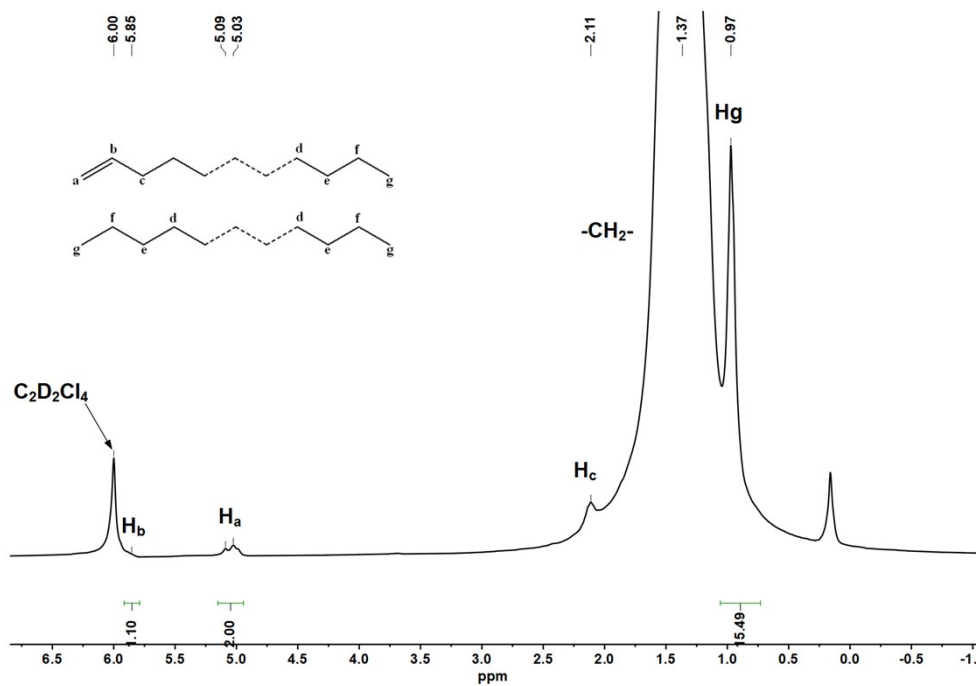

**Figure S18.** <sup>1</sup>H NMR spectrum of the polyethylene prepared with catalyst Fe6/MMAO at 70 °C (entry 21, Table 2).

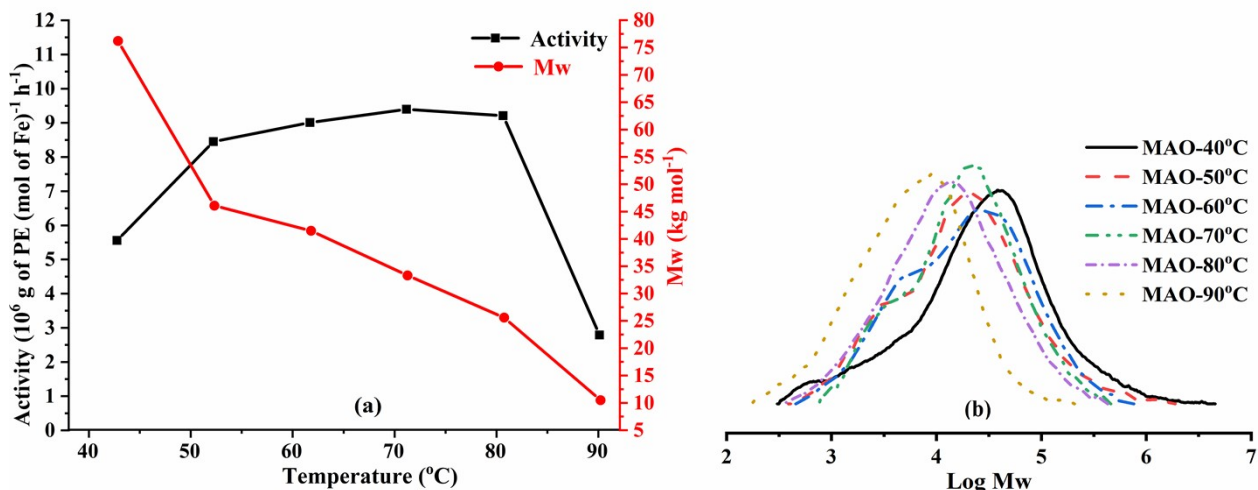

**Figure S19.** Activity and  $M_w$  as a function of reaction temperature (a); GPC curves of the obtained polyethylene at different run temperatures (b) for the **Fe2/MAO** system (entries 1–6, Table 3).

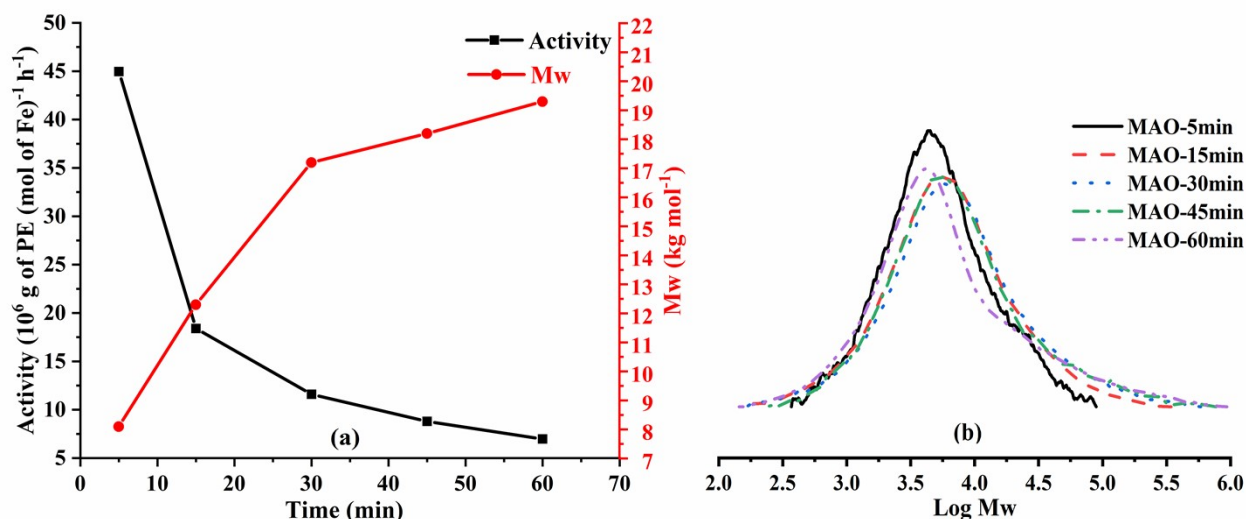

**Figure S20.** Activity and  $M_w$  as a function of reaction time (a); GPC curves of the obtained polyethylene at different run time (b) for the **Fe2/MAO** system (entries 10, 12–15, Table 3).

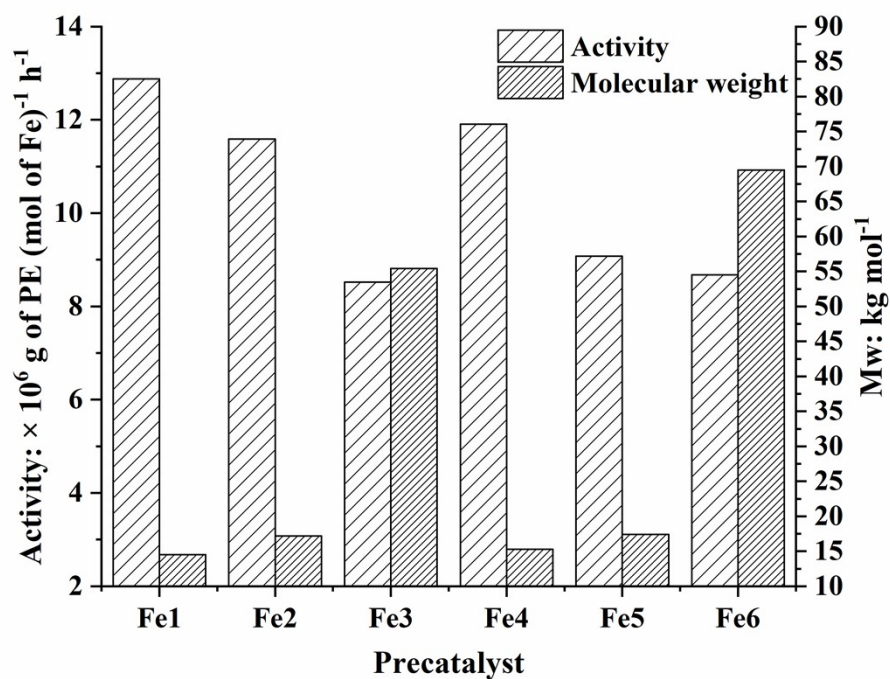

**Figure S21.** Catalytic activities and molecular weight of resultant polyethylenes by **Fe1–Fe6/MAO** (entries 10, 17–21, Table 3).

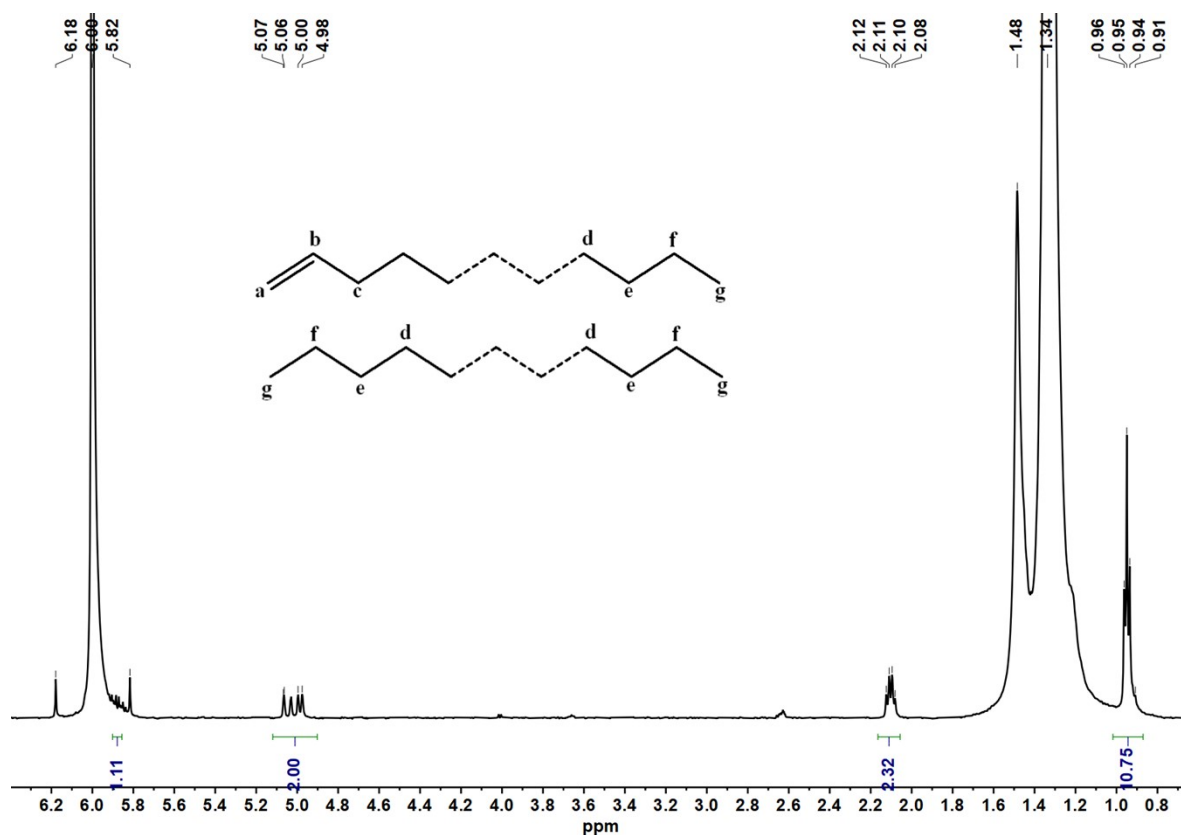

**Figure S22.**  $^1\text{H}$  NMR spectrum of the polyethylene prepared with catalyst **Fe1/MAO** at  $70\text{ }^\circ\text{C}$  (entry 17, Table 3).

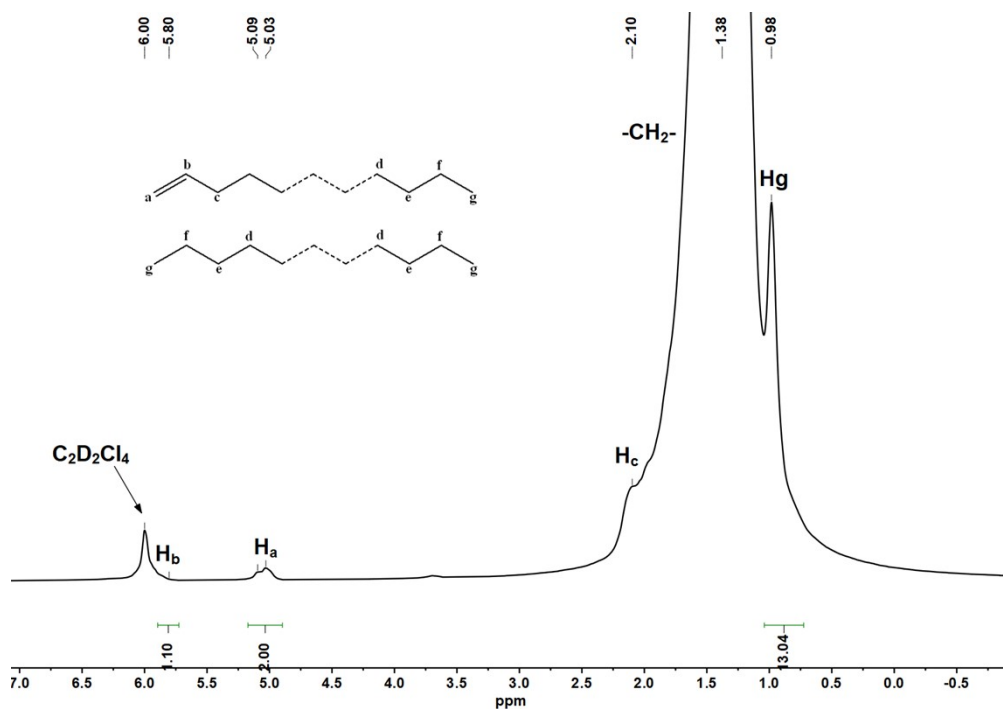

**Figure S23.**  $^1\text{H}$  NMR spectrum of the polyethylene prepared with catalyst Fe6/MAO at 70 °C (entry 21, Table 3).

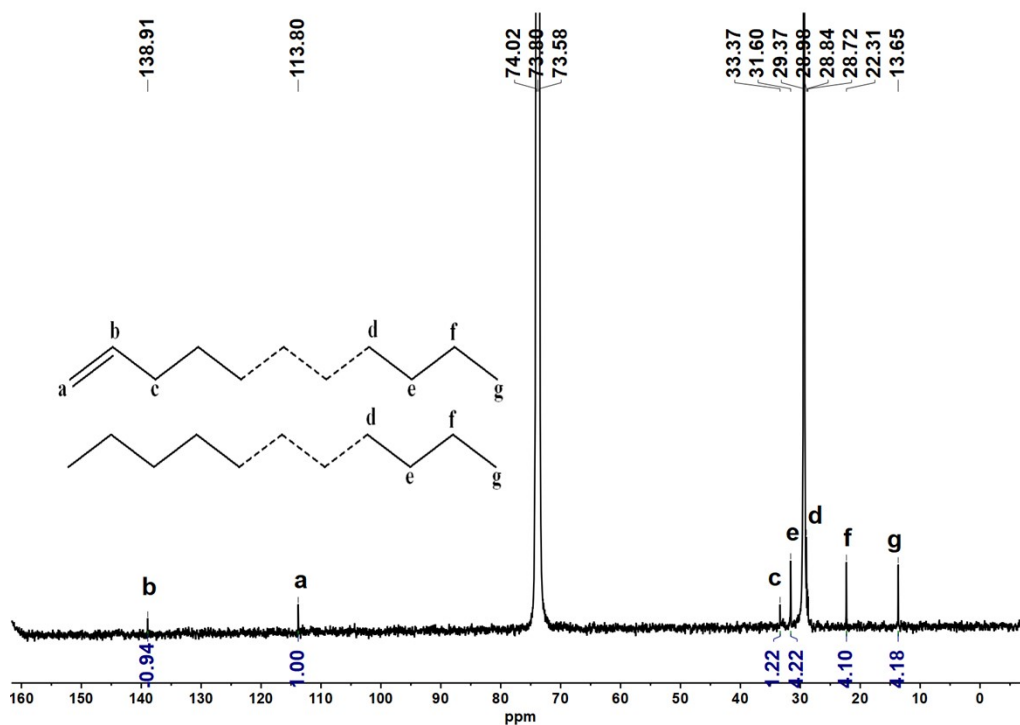

**Figure S24.** 1D sequence inverse-gated decoupled  $^{13}\text{C}$  NMR spectrum of the polyethylene obtained using Fe2/MAO ( $\delta$  C 73.8, tetrachloroethane- $d_2$ ) (entry 10, Table 3).

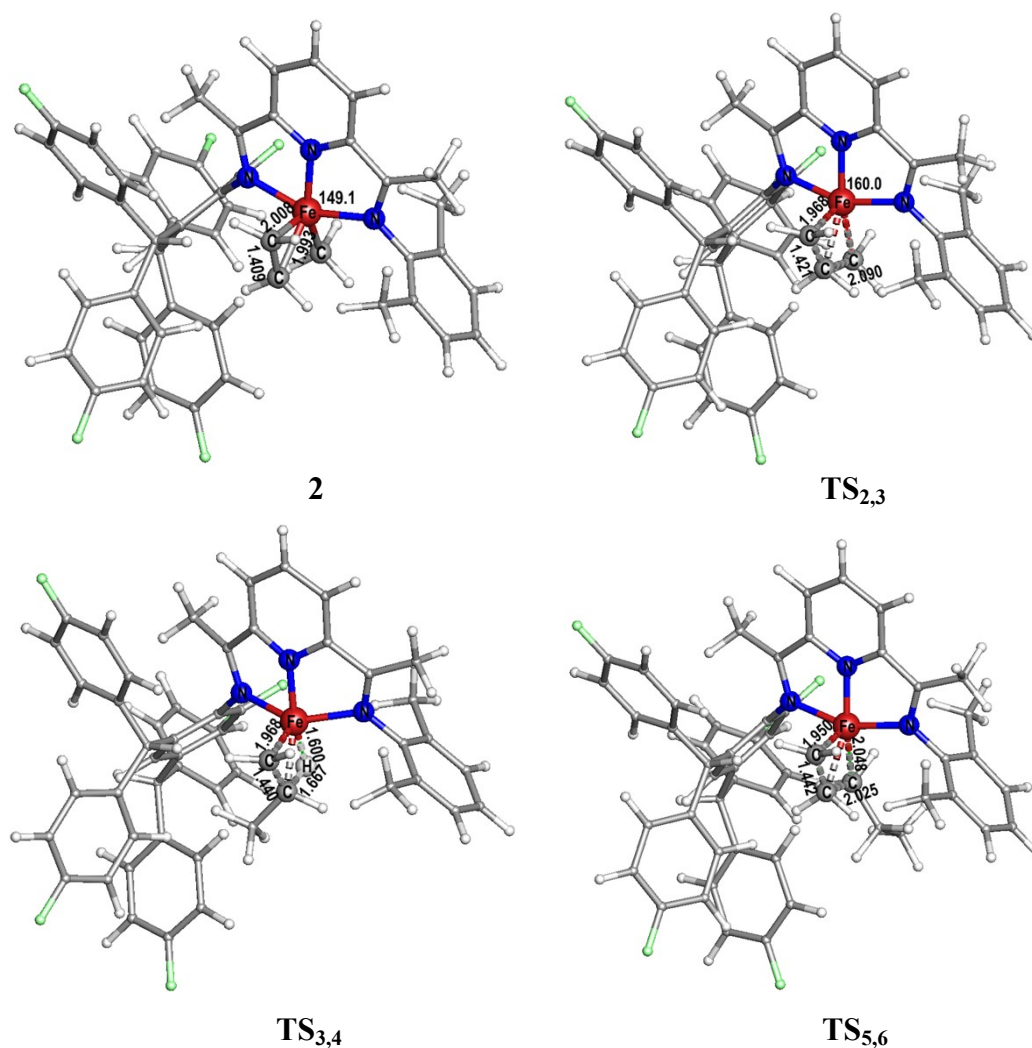

**Figure S25.** Optimized structures of **2**, **TS<sub>2,3</sub>** (287i cm<sup>-1</sup>), **TS<sub>3,4</sub>** (313i cm<sup>-1</sup>), and **TS<sub>5,6</sub>** (442i cm<sup>-1</sup>). Mesitylene groups are omitted for clarity. Bond lengths are in Å.

**Table S1** Calculation data of the optimized structures as well as their total electronic energy (E), total free energy (G), and total enthalpy (H).

| Complexes               | Structure | Electronic energy (Hartree) | Free energy (Hartree) | Enthalpy (Hartree) |
|-------------------------|-----------|-----------------------------|-----------------------|--------------------|
| <b>1</b>                |           | -3855.353607                | -3854.666068          | -3854.521542       |
| <b>2</b>                |           | -3933.867877                | -3933.124743          | -3932.977638       |
| <b>TS<sub>2,3</sub></b> |           | -3933.843842                | -3933.103653          | -3932.955144       |
| <b>3</b>                |           | -3933.916439                | -3933.174389          | -3933.024148       |

|                   |  |              |              |              |
|-------------------|--|--------------|--------------|--------------|
| TS <sub>3,4</sub> |  | -3933.869566 | -3933.129786 | -3932.983415 |
| 4                 |  | -3933.876521 | -3933.137829 | -3932.988136 |
| 5                 |  | -4012.446943 | -4011.653591 | -4011.497991 |
| TS <sub>5,6</sub> |  | -4012.418101 | -4011.620463 | -4011.468928 |
| 6                 |  | -4012.485495 | -4011.688819 | -4011.534009 |
| TS <sub>6,7</sub> |  | -4012.427279 | -4011.631314 | -4011.481755 |
| 7                 |  | -4012.432784 | -4011.639443 | -4011.484927 |
| 8                 |  | -4091.000237 | -4090.148986 | -4089.991351 |
| TS <sub>8,9</sub> |  | -4090.986592 | -4090.136838 | -4089.978347 |
| 9                 |  | -4091.052728 | -4090.203188 | -4090.043022 |
| 10                |  | -3816.058251 | -3815.400408 | -3815.257244 |

**Table S2** Crystal data and structure refinement for **Fe2** and **Fe3**.

| Identification Code | <b>Fe2</b>                                                                      | <b>Fe3</b>                                                                                                       |
|---------------------|---------------------------------------------------------------------------------|------------------------------------------------------------------------------------------------------------------|
| CCDC number         | 2160181                                                                         | 2160182                                                                                                          |
| Empirical formula   | C <sub>51</sub> H <sub>42</sub> Cl <sub>2</sub> F <sub>5</sub> FeN <sub>3</sub> | C <sub>53</sub> H <sub>46</sub> Cl <sub>2</sub> F <sub>5</sub> FeN <sub>3</sub> ·CH <sub>2</sub> Cl <sub>2</sub> |
| Formula weight      | 918.62                                                                          | 1031.60                                                                                                          |
| Temperature/K       | 169.98(14)                                                                      | 170.00(10)                                                                                                       |
| Crystal system      | orthorhombic                                                                    | orthorhombic                                                                                                     |
| Space group         | Pna21                                                                           | P2 <sub>1</sub> 2 <sub>1</sub> 2 <sub>1</sub>                                                                    |
| a/Å                 | 16.1979(8)                                                                      | 12.8077(5)                                                                                                       |
| b/Å                 | 42.047(3)                                                                       | 15.7660(6)                                                                                                       |
| c/Å                 | 15.3322(9)                                                                      | 24.8093(10)                                                                                                      |
| α/°                 | 90                                                                              | 90                                                                                                               |
| β/°                 | 90                                                                              | 90                                                                                                               |
| γ/°                 | 90                                                                              | 90                                                                                                               |

|                                             |                                                                |                                                                |
|---------------------------------------------|----------------------------------------------------------------|----------------------------------------------------------------|
| Volume/Å <sup>3</sup>                       | 10442.3(12)                                                    | 5009.6(3)                                                      |
| Z                                           | 8                                                              | 4                                                              |
| $\rho_{\text{calc}}/\text{g}/\text{cm}^3$   | 1.169                                                          | 1.368                                                          |
| $\mu/\text{mm}^{-1}$                        | 3.685                                                          | 0.572                                                          |
| F(000)                                      | 3792.0                                                         | 2128.0                                                         |
| Crystal size/mm <sup>3</sup>                | 0.15 × 0.12 × 0.1                                              | 0.22 × 0.182 × 0.135                                           |
| Radiation                                   | Cu K $\alpha$ ( $\lambda = 1.54184$ )                          | MoK $\alpha$ ( $\lambda = 0.71073$ )                           |
| 2 $\theta$ range for data collection/°      | 5.848 to 131.968                                               | 6.902 to 61.44                                                 |
| Index ranges                                | -19 ≤ h ≤ 18, -48 ≤ k ≤ 49, -15 ≤ l ≤ 7                        | -15 ≤ h ≤ 18, -16 ≤ k ≤ 22, -34 ≤ l ≤ 35                       |
| Reflections collected                       | 37481                                                          | 33959                                                          |
| Independent reflections                     | 12010 [R <sub>int</sub> = 0.1700, R <sub>sigma</sub> = 0.1565] | 13013 [R <sub>int</sub> = 0.0558, R <sub>sigma</sub> = 0.0984] |
| Data/restraints/parameters                  | 12010/59/1137                                                  | 13013/0/610                                                    |
| Goodness-of-fit on F <sup>2</sup>           | 1.092                                                          | 0.985                                                          |
| Final R indexes [I >= 2 $\sigma$ (I)]       | R <sub>1</sub> = 0.1198, wR <sub>2</sub> = 0.3120              | R <sub>1</sub> = 0.0530, wR <sub>2</sub> = 0.1053              |
| Final R indexes [all data]                  | R <sub>1</sub> = 0.1842, wR <sub>2</sub> = 0.3516              | R <sub>1</sub> = 0.1051, wR <sub>2</sub> = 0.1201              |
| Largest diff. peak/hole / e Å <sup>-3</sup> | 0.60/-0.73                                                     | 0.43/-0.51                                                     |
| Flack parameter                             | 0.43(2)                                                        | -0.006(11)                                                     |

## General Considerations

All manipulations of air- and/ or moisture-sensitive compounds were performed under an atmosphere of nitrogen using standard Schlenk techniques or using high-purity nitrogen-protected glove box. The ligand synthesis was performed using a high throughput (HT) automated workstation-FLEX MULTIPLANT (Chemspeed technologies, Füllinsdorf, Basel, Switzerland). The FLEX MULTIPLANT contains a reactor module consisting of six 100 mL process developing reactors (PD-reactors) equipped with a condenser which can be operated in parallel. The steps involved in the synthesis including the solvent feeding (via peristaltic pumps), gradient heating, stirring of the reactant mixture, were completely automated and executed using Chemspeed AutoSuite software. FT-IR spectra were recorded using a PerkinElmer System 2000 FT-IR spectrometer. Elemental analyses were performed by a Flash EA 1112 microanalyzer. High temperature <sup>1</sup>H NMR and <sup>13</sup>C NMR spectra of polyethylene were taken in 1,1,2,2-tetrachloroethane-*d*<sub>2</sub> (2 mL) at 100 °C with TMS as an internal standard. <sup>13</sup>C spectra of polymers obtained by **Fe2**/MMAO and **Fe2**/MAO were recorded on a Bruker DMX 300 spectrometer at 75.47 MHz in 5 mm standard glass tubes at 100 °C with the number of scans between 3000 and 5000. Operating conditions used for <sup>13</sup>C spectra: spectral width 18.8324 kHz; acquisition time 0.87 s; relaxation delay 2.0 s. While <sup>1</sup>H spectra of these samples as well as polymers obtained by



**Fe1** were measured using a Bruker AVANCE III 500WB spectrometer at 499.92 MHz with 32 scans. Operating conditions used for  $^1\text{H}$  spectra: spectral width 15.0 kHz; acquisition time 2.1845 s; relaxation delay 2.0 s.  $^1\text{H}$  spectra of polymers obtained by **Fe6**/MMAO and **Fe6**/MAO were recorded on a Bruker DMX 300 spectrometer at 300 MHz. Operating conditions used for  $^1\text{H}$  spectra: spectral width 14.9701 kHz; acquisition time 2.1889 s; relaxation delay 1.0 s. Moreover, 1D sequence inverse-gated decoupled  $^{13}\text{C}$  NMR spectra of the polymers were measured by a Bruker AVANCE III 500WB spectrometer maintained at 100 °C and its operating conditions were set as follows: spectral frequency 125.70 MHz; pulse width 10.0 Ms; spectral width 21.3675 kHz; acquisition time 0.7668 s; relaxation delay 5.0 s; number of scans 2500. High-temperature gel permeation chromatography (GPC) was performed on PL-GPC 220 instrument in 1,2,4-trichlorobenzene at 150 °C. Melting temperatures of preheated samples were determined by differential scanning calorimetry (DSC) with a PerkinElmer TA-Q2000 DSC analyzer. The program was set as follows: a sample (4.0 – 6.0 mg) was heated to 150 °C at a rate of 20 °C  $\text{min}^{-1}$  and kept for 5 min at 150 °C to remove the thermal history and cooled to -20 °C at a rate of 20 °C  $\text{min}^{-1}$ . Other reagents were purchased from Aldrich, Acros or local suppliers and used as received. Cocatalysts MAO (1.46 M in toluene) and MMAO (1.93 M in heptane) were purchased from Akzo Nobel corporation. Toluene used as solvent in polymerization was distilled over sodium for 8 hours and distilled under nitrogen atmosphere prior to use.

### **Typical procedures for ethylene polymerization.**

*Ethylene polymerization at 1 atm  $\text{C}_2\text{H}_4$ .* A 100 mL oven-dried Schlenk flask containing pre-catalyst (1.5  $\mu\text{mol}$ ) equipped with a stirrer was placed in a water bath and purged with ethylene (1 atm), followed by charging with 30 mL of freshly distilled toluene and the required amount of cocatalyst via syringe. The optimum experimental temperature has already been set based on the results of 10 atm polymerization. After the reaction mixture was stirred under 1 atm of ethylene pressure for 30 min, the pressure was vented and the solution was quenched with 10% hydrochloric acid in ethanol. The polymer was further precipitated by pouring the reaction mixture into large volume of acidified ethanol (10% HCl), filtered, washed with ethanol, and then dried under vacuum at 80 °C to a constant weight.

*Ethylene polymerization at 5 or 10 atm C<sub>2</sub>H<sub>4</sub>.* The 5 or 10 atm ethylene polymerization was carried out in a stainless-steel autoclave (250 mL) which was equipped with an ethylene pressure control system, a temperature controller and a mechanical stirrer. The oven-dried stainless-steel autoclave was placed under vacuum and backfilled with nitrogen two times and ethylene one time. After that, the autoclave allowed to cool to the required reaction temperature under ethylene atmosphere, then the toluene solution (25 mL) with dissolved precatalyst (1.5 μmol) was injected into the autoclave. More toluene (25 mL) was then added to completely wash the residual precatalyst into the autoclave. Then the required amount of cocatalyst was introduced by syringe followed by more toluene (50 mL) to complete the addition. Afterwards, the reactor was sealed and pressurized to 5 or 10 atm of ethylene pressure. After the reaction was carried out for 30 min, the pressure was released and 10 mL of methanol was immediately injected to stop the reaction. The reaction mixture was poured into a large amount of acidified ethanol (10% HCl) to precipitate the resulting polymer, filtered, washed with ethanol, and then dried under vacuum at 100 °C to a constant weight.

## **Computational Part**

### **1. Computational Details**

All DFT calculations in this study were performed using the Gaussian 09<sup>1</sup> suite of ab initio programs for the M06 functional<sup>2</sup> with the all-electron 6-31G(d,p) basis set<sup>3,4</sup>. All structures were optimized with solvent effect corrections using the integral equation formalism polarizable continuum model (IEFPCM)<sup>5</sup> with the SMD<sup>6</sup> (Solvation Model Based on Density) atomic radii for isopropanol. Thermal corrections were obtained by frequency calculations using the same method on optimized structures within the harmonic potential approximation under 298.15 K and 1 atm pressure. The energies reported in the text are Gibbs free energies with solvent effect corrections. The spin multiplicities of ground states were verified as doublet by comparing the relative energies of optimized structures at different spin states. The optimized structures were confirmed to have no imaginary vibrational mode for all intermediates and only one imaginary vibrational mode for each transition state (TS). All TSs were also confirmed to connect correct intermediates by intrinsic reaction coordinate (IRC) calculations. The 3D molecular structures shown in this paper were drawn by using the JIMP2 molecular visualizing and manipulating

program.<sup>7</sup>

## 2. Evaluation of density functionals

In order to evaluate the dependence of density functionals of this catalytic system, we calculated the relative electronic energies between key intermediates and transition states using other widely-used and/or recently developed density functionals, including B3LYP<sup>8,9</sup>, B3LYP-D3<sup>10</sup>, B3PW91<sup>11,12</sup>, B3PW91-D3<sup>11-13</sup>, HSE06<sup>14,15</sup>, HSE06-D3<sup>13-15</sup>, M06-L<sup>16</sup>, PBEh1PBE<sup>17</sup>, PBEh1PBE-D3<sup>13,17</sup>, TPSSh<sup>18,19</sup>, TPSSh-D3<sup>13,18,19</sup>,  $\omega$ B97X<sup>20</sup> and  $\omega$ B97X-D<sup>20</sup> with the same basis sets introduced above. The calculation results are listed in Table S3. We can see that the largest difference of relative electronic energies obtained by different functionals is near 25 kcal/mol, which indicates a strong functional dependency of this iron catalytic system. Some functionals without dispersion corrections, such as B3LYP, B3PW91, HSE06, PBEh1PBE, TPSS and  $\omega$ B97X, lead to obviously smaller relative electronic energies. The results of M06 are in the middle of those functionals and very close to the results of B3LYP-D3, M06-L, PBEh1PBE-D3 functionals. More importantly, the free energy barrier obtained by the M06 functional matches well with the experimental conditions. Therefore, we believe M06 is a suitable functional for computational study of this system.

**Table S3.** Absolute and relative electronic energies of **D3** and **DTS<sub>3,4</sub>** with different functionals of polymerization.

| Functionals     | Absolute electronic energies<br>(Hartree) |                          | Relative electronic energies<br>(kcal/mol)       |
|-----------------|-------------------------------------------|--------------------------|--------------------------------------------------|
|                 | <b>D3</b>                                 | <b>DTS<sub>3,4</sub></b> | <b>D3</b> $\rightarrow$ <b>DTS<sub>3,4</sub></b> |
| B3LYP           | -3935.73562078                            | -3935.70234929           | 20.9                                             |
| B3LYP-D3        | -3935.90310857                            | -3935.86236798           | 25.6                                             |
| B3PW91          | -3934.73051519                            | -3934.67053164           | 37.6                                             |
| B3PW91-D3       | -3934.91894657                            | -3934.85063380           | 42.9                                             |
| HSE06           | -3932.77093386                            | -3932.70606175           | 40.7                                             |
| HSE06-D3        | -3932.76937852                            | -3932.70050967           | 43.2                                             |
| M06             | -3933.91638258                            | -3933.86956648           | 29.4                                             |
| M06-L           | -3935.47764847                            | -3935.42573318           | 32.6                                             |
| PBEh1PBE        | -3932.78785343                            | -3932.75885601           | 18.2                                             |
| PBEh1PBE-D3     | -3932.80072862                            | -3932.75329159           | 29.8                                             |
| TPSSh           | -3935.94609773                            | -3935.91628147           | 18.7                                             |
| TPSSh-D3        | -3935.94155728                            | -3935.91093876           | 19.3                                             |
| $\omega$ B97X   | -3935.08908036                            | -3935.05277633           | 22.8                                             |
| $\omega$ B97X-D | -3934.94653646                            | -3934.90739931           | 24.6                                             |

### 3. Evaluation of spin states

In order to find out correct spin-states in those reactions, we optimized the structures of quartet states of key intermediates and transition states using the same methods described above. As shown in Table S4, the quartet states are less stable than the corresponding doublet states. Therefore, we believe those polymerization reactions go through low-spin pathways without spin crossover.

**Table S4.** Absolute and relative free energies of doublet and quartet states of key intermediates and transition states of polymerization catalyzed by iron complex.

| Complexes               | Absolute free energies (Hartree) |              | Relative energies (kcal/mol) |
|-------------------------|----------------------------------|--------------|------------------------------|
|                         | Doublet                          | Quartet      | Doublet → Quartet            |
| <b>1</b>                | -3855.353606                     | -3855.341654 | 7.5                          |
| <b>TS<sub>2,3</sub></b> | -3933.843842                     | -3933.828724 | 9.5                          |

### 4. References

1. Frisch, M. J.; Trucks, G. W.; Schlegel, H. B.; Scuseria, G. E.; Robb, M. A.; Cheeseman, J. R.; Scalmani, G.; Barone, V.; Mennucci, B.; Petersson, G. A.; et al. *Gaussian 09, Revision C.01*; Gaussian, Inc.: Wallingford, CT, USA, 2010.
2. Chai, J. D.; Head-Gordon, M. Long-range corrected hybrid density functionals with damped atom-atom dispersion corrections. *Phys. Chem. Chem. Phys.* **2008**, *10*, 6615-6620.
3. Hehre, W. J.; Ditchfield, R.; Pople, J. A. Self-Consistent Molecular Orbital Methods. XII. Further Extensions of Gaussian-Type Basis Sets for Use in Molecular Orbital Studies of Organic Molecules. *J. Chem. Phys.* **1972**, *56*, 2257-2261.
4. Krishnan, R.; Binkley, J. S.; Seeger, R.; Pople, J. A. Self-consistent molecular orbital methods. XX. A basis set for correlated wave functions. *J. Chem. Phys.* **1980**, *72*, 650-654.
5. Tomasi, J.; Mennucci, B.; Cammi, R. Quantum Mechanical Continuum Solvation Models. *Chem. Rev.* **2005**, *105*, 2999-3093.
6. Marenich, A. V.; Cramer, C. T.; Truhlar, D. G. Universal Solvation Model Based on Solute Electron Density and on a Continuum Model of the Solvent Defined by the Bulk Dielectric Constant and Atomic Surface Tensions. *J. Phys. Chem. B.* **2009**, *113*, 6378-6396.

7. Manson, J.; Webster, C. E.; Hall, M. B. *JIMP2, version 0.091*, A Free Program for Visualizing and Manipulating Molecules; Texas A&M University: College Station, TX, USA, 2006.
8. Becke, A. D. Density-functional thermochemistry. III. The role of exact exchange. *J. Chem. Phys.* **1993**, *98*, 5648-5652.
9. Lee, C.; Yang, W.; Parr, R. G. Development of the Colle-Salvetti correlation-energy formula into a functional of the electron density. *Phys. Rev. B. Condens. Matter.* **1988**, *37*, 785-789.
10. Goerigk, L.; Grimme, S. A thorough benchmark of density functional methods for general main group thermochemistry, kinetics, and noncovalent interactions. *Phys. Chem. Chem. Phys.* **2011**, *13*, 6670-6688.
11. Perdew, J. P.; Chevary, J. A.; Vosko, S. H.; Jackson, K. A.; Pederson, M. R.; Singh, D. J.; Fiolhais, C. Atoms, molecules, solids, and surfaces: Applications of the generalized gradient approximation for exchange and correlation. *Phys. Rev. B. Condens. Matter.* **1992**, *46*, 6671-6687.
12. Perdew, J. P.; Chevary, J. A.; Vosko, S. H.; Jackson, K. A.; Pederson, M. R.; Singh, D. J.; Fiolhais, C. Erratum: Atoms, molecules, solids, and surfaces: Applications of the generalized gradient approximation for exchange and correlation. *Phys. Rev. B. Condens. Matter.* **1993**, *48*, 4978.
13. Grimme, S.; Antony, J.; Ehrlich, S.; Krieg, H. A consistent and accurate *ab initio* parametrization of density functional dispersion correction (DFT-D) for the 94 elements H-Pu. *J. Chem. Phys.* **2010**, *132*, 154104.
14. Henderson, T. M.; Izmaylov, A. F.; Scalmani, G.; Scuseria, G. E. Can short-range hybrids describe long-range-dependent properties? *J. Chem. Phys.* **2009**, *131*, 044108.
15. Krukau, A. V.; Vydrov, O. A.; Izmaylov, A. F.; Scuseria, G. E. Influence of the exchange screening parameter on the performance of screened hybrid functionals. *J. Chem. Phys.* **2006**, *125*, 224106.
16. Zhao, Y.; Truhlar, D. G. The M06 suite of density functionals for main group thermochemistry, thermochemical kinetics, noncovalent interactions, excited states, and transition elements: two new functionals and systematic testing of four M06-class functionals and 12 other functionals. *Theor. Chem. Account*, **2008**, *120*, 215-241.

17. Ernzerhof, M.; Perdew, J. P. Generalized gradient approximation to the angle- and system-averaged exchange hole. *J. Chem. Phys.* **1998**, *109*, 3313-3320.
18. Tao, J.; Perdew, J. P.; Staroverov, V. N.; Scuseria, G. E. Climbing the density functional ladder: nonempirical meta-generalized gradient approximation designed for molecules and solids. *Phys. Rev. Lett.* **2003**, *91*, 146401.
19. Staroverov, V. N.; Scuseria, G. E.; Tao, J. Perdew, J. P. Comparative assessment of a new nonempirical density functional: Molecules and hydrogen-bonded complexes. *J. Chem. Phys.* **2003**, *119*, 12129-12137.
20. Chai, J. D.; Head-Gordon, M. Long-range corrected hybrid density functionals with damped atom-atom dispersion corrections. *Phys. Chem. Chem. Phys.* **2008**, *10*, 6615-6620.

## 5. Atomic coordinates and solvent corrected absolute free energies of all optimized structures

1 Gsolv= -3854.666068

|   |             |             |             |
|---|-------------|-------------|-------------|
| C | -3.14212300 | -2.74845000 | -0.83172700 |
| C | -4.07741500 | -3.79270700 | -0.77759000 |
| C | -5.42826400 | -3.48691200 | -0.94110100 |
| C | -5.86649500 | -2.17810100 | -1.15369200 |
| C | -4.90808700 | -1.15732800 | -1.20039000 |
| N | -3.59157500 | -1.47615000 | -1.04328500 |
| H | -6.16002800 | -4.29096800 | -0.90297000 |
| H | -3.75754900 | -4.81838400 | -0.61484700 |
| H | -6.92251800 | -1.95437800 | -1.28147300 |
| C | -5.07587600 | 0.25245200  | -1.37256900 |
| C | -1.72499000 | -2.76302900 | -0.65289800 |
| C | -6.42782000 | 0.87180600  | -1.46654100 |
| H | -6.92897100 | 0.60971400  | -2.40971100 |
| H | -7.07677600 | 0.51548700  | -0.65594800 |
| H | -6.37754600 | 1.96274100  | -1.40574600 |
| C | -0.95022600 | -3.98800900 | -0.32204200 |
| H | -0.32115900 | -3.82393000 | 0.56408000  |
| H | -1.61325000 | -4.83154600 | -0.10903200 |
| H | -0.28360100 | -4.27910800 | -1.14508800 |
| N | -3.91029300 | 0.94240200  | -1.40831200 |
| N | -1.15078600 | -1.53755800 | -0.75908200 |
| C | -3.91063700 | 2.36036600  | -1.47644200 |
| C | -3.65741400 | 3.07761600  | -0.29633500 |
| C | -4.04846500 | 3.01565300  | -2.70888900 |

|   |             |             |             |
|---|-------------|-------------|-------------|
| C | -3.56889700 | 4.46728100  | -0.36075700 |
| C | -3.95699000 | 4.40815900  | -2.73340300 |
| C | -3.72341400 | 5.13348700  | -1.57120100 |
| H | -3.37176700 | 5.02693400  | 0.55297400  |
| H | -4.06035600 | 4.92411600  | -3.68742100 |
| H | -3.65062200 | 6.21811500  | -1.61057100 |
| C | 0.22612400  | -1.37609000 | -0.50472300 |
| C | 1.18519200  | -1.74534800 | -1.43932300 |
| C | 0.66563900  | -0.70309600 | 0.65187900  |
| C | 2.53788200  | -1.48441100 | -1.28172200 |
| C | 2.02158100  | -0.45948800 | 0.82605200  |
| C | 2.97005500  | -0.83044300 | -0.13270700 |
| H | 3.22564700  | -1.78908100 | -2.06698800 |
| H | 2.35466500  | 0.07908000  | 1.71394700  |
| C | -3.46158700 | 2.34027200  | 0.99180800  |
| H | -4.36370100 | 1.78896600  | 1.29269100  |
| C | -4.24470800 | 2.23057600  | -3.96835000 |
| H | -5.20404200 | 1.69676900  | -3.98305400 |
| C | -0.38182200 | -0.26021000 | 1.65820800  |
| H | -1.22325600 | 0.11006600  | 1.04719400  |
| C | 4.41713800  | -0.43112000 | 0.09888000  |
| H | 4.66982600  | -0.76779900 | 1.11795600  |
| C | -0.92369700 | -1.44793900 | 2.42742500  |
| C | -0.06574100 | -2.36888300 | 3.03594300  |
| C | -2.29984500 | -1.66787500 | 2.50308800  |
| C | -0.56368600 | -3.48133500 | 3.70540000  |
| H | 1.01190300  | -2.21922700 | 2.97262500  |
| C | -2.81842400 | -2.78253600 | 3.15311900  |
| H | -2.98358900 | -0.96353700 | 2.02686900  |
| C | -1.93608800 | -3.67108300 | 3.74450000  |
| H | 0.09158400  | -4.20524600 | 4.18217100  |
| H | -3.88724000 | -2.97332300 | 3.19738900  |
| C | 0.06608300  | 0.91640600  | 2.50322600  |
| C | 0.29326200  | 0.83644400  | 3.87561700  |
| C | 0.26974100  | 2.14572000  | 1.86176900  |
| C | 0.71726100  | 1.94956300  | 4.59890100  |
| H | 0.13087500  | -0.10343300 | 4.39893100  |
| C | 0.69333600  | 3.26401200  | 2.56409400  |
| H | 0.09215400  | 2.22324700  | 0.78747500  |
| C | 0.91169100  | 3.14317800  | 3.92904800  |
| H | 0.89507800  | 1.90021200  | 5.66974700  |
| H | 0.85688200  | 4.22022200  | 2.07452400  |
| C | 5.38700800  | -1.12916700 | -0.83459400 |
| C | 5.74937000  | -0.58056800 | -2.06655100 |

|    |             |             |             |
|----|-------------|-------------|-------------|
| C  | 5.89462900  | -2.38273300 | -0.48605800 |
| C  | 6.60067600  | -1.25998700 | -2.93111500 |
| H  | 5.36288800  | 0.39593200  | -2.35453800 |
| C  | 6.74997300  | -3.07638200 | -1.33377200 |
| H  | 5.61257100  | -2.82510600 | 0.46901400  |
| C  | 7.08818400  | -2.49797400 | -2.54610700 |
| H  | 6.89309100  | -0.84361800 | -3.89120100 |
| H  | 7.15724400  | -4.04869300 | -1.07042700 |
| C  | 4.60044100  | 1.07973000  | 0.09785700  |
| C  | 3.72966200  | 1.94562300  | -0.56584300 |
| C  | 5.70470000  | 1.62268400  | 0.76113400  |
| C  | 3.94715300  | 3.32056600  | -0.56569600 |
| H  | 2.86223200  | 1.54617000  | -1.08951900 |
| C  | 5.93738900  | 2.99132000  | 0.77587100  |
| H  | 6.39619000  | 0.95578600  | 1.27594600  |
| C  | 5.04759700  | 3.81910500  | 0.10891000  |
| H  | 3.27472800  | 4.00432500  | -1.07673600 |
| H  | 6.78790000  | 3.42446600  | 1.29517600  |
| F  | 0.77505200  | -2.35939400 | -2.55995800 |
| F  | -2.42303800 | -4.75117700 | 4.37010800  |
| F  | 1.31853600  | 4.21833800  | 4.61767000  |
| F  | 7.91534900  | -3.15524700 | -3.37031900 |
| F  | 5.25993400  | 5.14236100  | 0.12058400  |
| C  | -0.97949500 | 1.11684900  | -1.99069600 |
| H  | -1.27984000 | 2.15938800  | -2.16904500 |
| H  | -0.78810400 | 0.66310900  | -2.98139100 |
| H  | -3.18532700 | 3.01602500  | 1.80772300  |
| H  | -2.65967300 | 1.59026300  | 0.89119400  |
| H  | -4.21689600 | 2.88375800  | -4.84670700 |
| H  | -3.46060400 | 1.47001700  | -4.08344300 |
| H  | -0.00110700 | 1.11901500  | -1.48416700 |
| Fe | -2.32920200 | -0.09489700 | -1.18096100 |

2 Gsolv= -3933.124743

|   |            |             |             |
|---|------------|-------------|-------------|
| C | 3.14931200 | 1.69170600  | -2.00076100 |
| C | 3.96890500 | 2.49875500  | -2.78929800 |
| C | 5.32316000 | 2.19285700  | -2.89630200 |
| C | 5.84693300 | 1.07827200  | -2.23216600 |
| C | 4.99751300 | 0.30175800  | -1.45649600 |
| N | 3.68018700 | 0.62213600  | -1.34080600 |
| H | 5.97192400 | 2.81366200  | -3.50814500 |
| H | 3.55522200 | 3.35133500  | -3.32200600 |
| H | 6.89856100 | 0.81920800  | -2.32923000 |
| C | 5.30183200 | -0.92758000 | -0.75431300 |



|   |             |             |             |
|---|-------------|-------------|-------------|
| C | 1.72394100  | 1.76053400  | -1.81563700 |
| C | 6.66201600  | -1.53342400 | -0.85391600 |
| H | 6.91333400  | -1.74897900 | -1.90064200 |
| H | 7.42449600  | -0.83816700 | -0.47971200 |
| H | 6.73803600  | -2.46394300 | -0.28640200 |
| C | 0.87671600  | 2.69921300  | -2.60518800 |
| H | -0.02585900 | 2.98983800  | -2.05744600 |
| H | 1.42470900  | 3.61201400  | -2.85948400 |
| H | 0.55780100  | 2.23102600  | -3.54731800 |
| N | 4.27347000  | -1.44889300 | -0.11537700 |
| N | 1.24871100  | 0.84198600  | -0.97993700 |
| C | 4.41752000  | -2.73858100 | 0.48073300  |
| C | 4.87497200  | -2.87721300 | 1.80097700  |
| C | 4.05433800  | -3.85820700 | -0.28547700 |
| C | 4.90360700  | -4.15719600 | 2.35839200  |
| C | 4.09171500  | -5.11716800 | 0.31338600  |
| C | 4.50150400  | -5.27028100 | 1.63149600  |
| H | 5.25654600  | -4.27240600 | 3.38258400  |
| H | 3.79695600  | -5.98617100 | -0.27387900 |
| H | 4.52187200  | -6.25751000 | 2.08769700  |
| C | -0.15881800 | 0.66974400  | -0.92295500 |
| C | -0.75743900 | -0.12515500 | -1.89841500 |
| C | -0.97665100 | 1.17447300  | 0.10182600  |
| C | -2.09268000 | -0.48471000 | -1.87760700 |
| C | -2.32891500 | 0.83644300  | 0.10698500  |
| C | -2.89791200 | -0.00500700 | -0.84941600 |
| H | -2.47439500 | -1.13837600 | -2.65833800 |
| H | -2.96043600 | 1.20318800  | 0.91681800  |
| C | 5.37653300  | -1.70443700 | 2.59082200  |
| H | 6.13436500  | -1.13361000 | 2.03805500  |
| C | 3.67869600  | -3.71018300 | -1.72849800 |
| H | 4.57239700  | -3.64538100 | -2.36620800 |
| C | -0.39667000 | 2.12129800  | 1.13877900  |
| H | 0.65356000  | 1.82699700  | 1.27567000  |
| C | -4.34257700 | -0.43329300 | -0.66457700 |
| H | -4.91059700 | 0.48092300  | -0.42638100 |
| C | -0.35978800 | 3.53957500  | 0.59727200  |
| C | -1.49788200 | 4.14065000  | 0.05076400  |
| C | 0.82724200  | 4.27268200  | 0.63472400  |
| C | -1.45397100 | 5.43247900  | -0.45872400 |
| H | -2.43331200 | 3.58388400  | 0.01384300  |
| C | 0.89396700  | 5.56699600  | 0.12747600  |
| H | 1.72069700  | 3.81928800  | 1.06364600  |
| C | -0.25193300 | 6.12236200  | -0.41503200 |

|   |             |             |             |
|---|-------------|-------------|-------------|
| H | -2.33010600 | 5.90967800  | -0.88935300 |
| H | 1.81462100  | 6.14379400  | 0.14632300  |
| C | -1.05966800 | 2.00053800  | 2.50481000  |
| C | -1.41551900 | 3.11609000  | 3.26319100  |
| C | -1.27336300 | 0.73056000  | 3.05880300  |
| C | -1.97079600 | 2.98010300  | 4.53342000  |
| H | -1.25652800 | 4.11558000  | 2.86439400  |
| C | -1.82900500 | 0.57411700  | 4.32042000  |
| H | -1.01639300 | -0.15864100 | 2.48365400  |
| C | -2.16918500 | 1.70932400  | 5.04000600  |
| H | -2.25053000 | 3.84534400  | 5.12836700  |
| H | -2.00450400 | -0.40925600 | 4.74823000  |
| C | -4.95940300 | -1.00703000 | -1.92600000 |
| C | -4.96243400 | -2.37743900 | -2.19256600 |
| C | -5.49125800 | -0.13917600 | -2.88309600 |
| C | -5.48588500 | -2.87556300 | -3.38119500 |
| H | -4.55256500 | -3.06955400 | -1.45875900 |
| C | -6.02242500 | -0.61657700 | -4.07478500 |
| H | -5.48707800 | 0.93334000  | -2.69004700 |
| C | -6.00921100 | -1.98347800 | -4.30170200 |
| H | -5.49679000 | -3.93986900 | -3.59981100 |
| H | -6.44520900 | 0.04819100  | -4.82317000 |
| C | -4.49932900 | -1.35469900 | 0.53620300  |
| C | -3.45700000 | -2.15491300 | 1.00866500  |
| C | -5.74095000 | -1.43057700 | 1.17336500  |
| C | -3.64163000 | -3.00521300 | 2.09513700  |
| H | -2.48006700 | -2.11524400 | 0.52784600  |
| C | -5.94457800 | -2.27074100 | 2.26010200  |
| H | -6.56467900 | -0.81706100 | 0.80877700  |
| C | -4.88403500 | -3.04534100 | 2.70358600  |
| H | -2.83709200 | -3.63076600 | 2.47235800  |
| H | -6.90314800 | -2.33117600 | 2.76818700  |
| F | 0.01104800  | -0.58479300 | -2.89815800 |
| F | -0.19989900 | 7.36495900  | -0.91365500 |
| F | -2.70843900 | 1.56892900  | 6.25908700  |
| F | -6.52183200 | -2.45577700 | -5.44621600 |
| F | -5.06858200 | -3.85571600 | 3.75494600  |
| C | 1.29560400  | -1.90568000 | 0.00545000  |
| H | 1.65046400  | -2.76685800 | 0.59042000  |
| H | 1.13283200  | -2.26749400 | -1.02971000 |
| H | 5.83535600  | -2.04072200 | 3.52649800  |
| H | 4.57891200  | -0.99853800 | 2.85067900  |
| H | 3.09404400  | -4.56892200 | -2.07498800 |
| H | 3.09499900  | -2.79971200 | -1.90477700 |

|    |            |             |             |
|----|------------|-------------|-------------|
| H  | 0.29857000 | -1.63692900 | 0.39005900  |
| Fe | 2.58144500 | -0.39950400 | -0.21887100 |
| C  | 3.12285300 | 0.77858700  | 1.31417100  |
| C  | 2.24945800 | -0.24149500 | 1.73957600  |
| H  | 1.21705300 | -0.00269100 | 1.99873700  |
| H  | 2.62723300 | -1.10393200 | 2.29103900  |
| H  | 4.19580300 | 0.72252700  | 1.50887100  |
| H  | 2.75956700 | 1.80163300  | 1.18402600  |

**3** Gsolv= -3933.174389

|   |             |             |             |
|---|-------------|-------------|-------------|
| C | -2.87309000 | -3.04582100 | -1.03703300 |
| C | -3.68858100 | -4.18431600 | -1.14498400 |
| C | -5.05177400 | -4.00921200 | -1.37564000 |
| C | -5.62045100 | -2.73911400 | -1.48598200 |
| C | -4.77938800 | -1.62352400 | -1.36871400 |
| N | -3.44333100 | -1.81322000 | -1.17726000 |
| H | -5.68959200 | -4.88580200 | -1.46655200 |
| H | -3.26562800 | -5.18096200 | -1.05511400 |
| H | -6.68667900 | -2.61497600 | -1.65584300 |
| C | -5.10586100 | -0.23246500 | -1.37023200 |
| C | -1.48072600 | -2.93693000 | -0.75306100 |
| C | -6.51872600 | 0.23418700  | -1.44798200 |
| H | -6.92893400 | 0.12590700  | -2.46271100 |
| H | -7.15862500 | -0.36082300 | -0.78420200 |
| H | -6.61408900 | 1.28500800  | -1.15907100 |
| C | -0.63449900 | -4.10952600 | -0.40029700 |
| H | -0.03020600 | -3.89717600 | 0.49228900  |
| H | -1.25126400 | -4.98604500 | -0.18083700 |
| H | 0.06007000  | -4.37792300 | -1.20731200 |
| N | -4.03066400 | 0.58270100  | -1.24578100 |
| N | -1.01289000 | -1.65766200 | -0.75170100 |
| C | -4.19144600 | 1.99038600  | -1.16385500 |
| C | -3.94102400 | 2.60721500  | 0.07490800  |
| C | -4.47027200 | 2.75487300  | -2.30801400 |
| C | -3.97841800 | 3.99719800  | 0.15617100  |
| C | -4.50325200 | 4.14567000  | -2.18451600 |
| C | -4.26055000 | 4.76730800  | -0.96703700 |
| H | -3.77646000 | 4.47569700  | 1.11382100  |
| H | -4.71133800 | 4.74455000  | -3.07069200 |
| H | -4.28135000 | 5.85242600  | -0.89447000 |
| C | 0.34353800  | -1.43103600 | -0.43709600 |
| C | 1.36027800  | -1.80858500 | -1.30952900 |
| C | 0.71774400  | -0.71082100 | 0.71468900  |
| C | 2.69536600  | -1.50283400 | -1.10405500 |

|   |             |             |             |
|---|-------------|-------------|-------------|
| C | 2.05737000  | -0.41139800 | 0.93275100  |
| C | 3.05780900  | -0.78488100 | 0.03145700  |
| H | 3.42454300  | -1.81374400 | -1.84862100 |
| H | 2.33199300  | 0.17568700  | 1.81029500  |
| C | -3.62315200 | 1.77076200  | 1.27567500  |
| H | -4.46969500 | 1.13192600  | 1.56453500  |
| C | -4.71420600 | 2.10870700  | -3.63800400 |
| H | -5.74523100 | 1.74045500  | -3.73173800 |
| C | -0.36879400 | -0.29312300 | 1.68374600  |
| H | -1.25303500 | -0.10655400 | 1.05528100  |
| C | 4.47763500  | -0.31159200 | 0.29265600  |
| H | 4.70001700  | -0.56305700 | 1.34265200  |
| C | -0.75323100 | -1.45315300 | 2.57838100  |
| C | 0.20300400  | -2.12279700 | 3.34738300  |
| C | -2.07624200 | -1.89508500 | 2.62381400  |
| C | -0.14764000 | -3.20688400 | 4.14244800  |
| H | 1.24097200  | -1.79319400 | 3.31756900  |
| C | -2.44666400 | -2.98513200 | 3.40484300  |
| H | -2.83353700 | -1.38600000 | 2.02598100  |
| C | -1.47072300 | -3.62153000 | 4.15228600  |
| H | 0.58437800  | -3.73666600 | 4.74595400  |
| H | -3.47144100 | -3.34423200 | 3.43915100  |
| C | -0.10732700 | 1.02345400  | 2.39028800  |
| C | -0.26242000 | 1.18833900  | 3.76544600  |
| C | 0.19675900  | 2.15110700  | 1.61349100  |
| C | -0.11590200 | 2.43994900  | 4.36089500  |
| H | -0.51201700 | 0.33254600  | 4.38896100  |
| C | 0.34610800  | 3.40436800  | 2.18795000  |
| H | 0.31588600  | 2.04358900  | 0.53423400  |
| C | 0.18519400  | 3.52625500  | 3.56070700  |
| H | -0.23477500 | 2.57946500  | 5.43198000  |
| H | 0.58465100  | 4.28119100  | 1.59189200  |
| C | 5.51234200  | -1.03235300 | -0.55044800 |
| C | 5.93295000  | -0.53769900 | -1.78648100 |
| C | 6.02302400  | -2.25675100 | -0.11276800 |
| C | 6.84290500  | -1.24059900 | -2.56891300 |
| H | 5.54742900  | 0.41557900  | -2.14431800 |
| C | 6.93628000  | -2.97272600 | -0.87713400 |
| H | 5.69649100  | -2.65808700 | 0.84632900  |
| C | 7.33050000  | -2.44753200 | -2.09731300 |
| H | 7.18001900  | -0.86512600 | -3.53121800 |
| H | 7.34552800  | -3.92241600 | -0.54354100 |
| C | 4.59200500  | 1.20193500  | 0.18684600  |
| C | 3.76339500  | 1.95895800  | -0.64415500 |

|    |             |             |             |
|----|-------------|-------------|-------------|
| C  | 5.58359100  | 1.86077900  | 0.91806200  |
| C  | 3.90885500  | 3.33945700  | -0.73962900 |
| H  | 2.98458400  | 1.46623600  | -1.22612900 |
| C  | 5.74476400  | 3.23817900  | 0.83811500  |
| H  | 6.24281200  | 1.28084800  | 1.56372300  |
| C  | 4.89823800  | 3.95538000  | 0.00764200  |
| H  | 3.26656900  | 3.93696000  | -1.38196000 |
| H  | 6.50751700  | 3.76141700  | 1.40832400  |
| F  | 1.02322700  | -2.46057800 | -2.43375100 |
| F  | -1.81327400 | -4.67327500 | 4.90820200  |
| F  | 0.32545400  | 4.73359800  | 4.12524600  |
| F  | 8.21334200  | -3.12766600 | -2.84128000 |
| F  | 5.04180500  | 5.28526300  | -0.07254600 |
| C  | -1.29624700 | 1.24028200  | -1.87779900 |
| H  | -1.46449600 | 2.11860700  | -1.22536300 |
| H  | -1.89002100 | 1.46811500  | -2.78378100 |
| C  | 0.16953600  | 1.17737800  | -2.27239300 |
| H  | 0.79423600  | 0.93952000  | -1.39756100 |
| H  | 0.33700600  | 0.35144900  | -2.98264100 |
| C  | 0.67015400  | 2.47977300  | -2.88448000 |
| H  | 1.72063400  | 2.41767300  | -3.20317500 |
| H  | 0.07532000  | 2.75995200  | -3.76429100 |
| H  | 0.58402900  | 3.30599100  | -2.16310300 |
| H  | -3.35040500 | 2.38958900  | 2.13742000  |
| H  | -2.78030100 | 1.09229600  | 1.07116500  |
| H  | -4.55278200 | 2.82241000  | -4.45288900 |
| H  | -4.05422700 | 1.24845200  | -3.80172300 |
| Fe | -2.33222200 | -0.29140100 | -1.10426800 |

4 Gsolv= -3933.137829

|   |            |             |             |
|---|------------|-------------|-------------|
| C | 3.18708500 | 1.42544100  | -1.93008400 |
| C | 3.99593800 | 2.11956000  | -2.84241200 |
| C | 5.36003900 | 1.88676000  | -2.86371400 |
| C | 5.90683000 | 0.88520700  | -2.03747600 |
| C | 5.07778600 | 0.23366800  | -1.14611600 |
| N | 3.77081000 | 0.59264400  | -1.00898400 |
| H | 5.99551200 | 2.42026900  | -3.56489600 |
| H | 3.54703200 | 2.81435200  | -3.54898900 |
| H | 6.95247000 | 0.60278900  | -2.12994000 |
| C | 5.40014600 | -0.96818700 | -0.39276200 |
| C | 1.76894400 | 1.34746800  | -1.89583700 |
| C | 6.77389100 | -1.54808500 | -0.45595100 |
| H | 7.03646900 | -1.77918300 | -1.49578600 |
| H | 7.51907400 | -0.83209000 | -0.08793600 |

|   |             |             |             |
|---|-------------|-------------|-------------|
| H | 6.85494900  | -2.46847100 | 0.12622500  |
| C | 0.92610500  | 1.96345300  | -2.96081600 |
| H | -0.05761600 | 2.26987300  | -2.59573800 |
| H | 1.40923100  | 2.84199200  | -3.39900300 |
| H | 0.76092900  | 1.23521400  | -3.76896000 |
| N | 4.37777700  | -1.50975200 | 0.22192700  |
| N | 1.29381500  | 0.52038100  | -0.94862800 |
| C | 4.51051900  | -2.75874400 | 0.89400400  |
| C | 5.10719700  | -2.85187500 | 2.16298300  |
| C | 3.97699400  | -3.88921500 | 0.25129700  |
| C | 5.14378300  | -4.10357800 | 2.78195600  |
| C | 4.03848500  | -5.11781700 | 0.90620800  |
| C | 4.61235800  | -5.22898400 | 2.16684000  |
| H | 5.60282100  | -4.18531500 | 3.76645500  |
| H | 3.62716400  | -5.99683500 | 0.41163700  |
| H | 4.65049500  | -6.19380800 | 2.66761100  |
| C | -0.10283100 | 0.29182200  | -0.92265800 |
| C | -0.60600700 | -0.79156500 | -1.64048900 |
| C | -1.01980300 | 1.09740600  | -0.21681300 |
| C | -1.94725500 | -1.13042400 | -1.67188900 |
| C | -2.37541900 | 0.78376600  | -0.29350700 |
| C | -2.85384600 | -0.33003700 | -0.98465600 |
| H | -2.25716900 | -2.00903500 | -2.23302900 |
| H | -3.09160900 | 1.39287100  | 0.25791900  |
| C | 5.69438000  | -1.65824800 | 2.85728000  |
| H | 6.39265800  | -1.10005700 | 2.22138200  |
| C | 3.36654500  | -3.76692000 | -1.10914000 |
| H | 4.08437500  | -3.37796200 | -1.84436300 |
| C | -0.52228300 | 2.28949400  | 0.59113700  |
| H | 0.47419900  | 1.99637700  | 0.96119800  |
| C | -4.32571800 | -0.67724300 | -0.85177600 |
| H | -4.88412300 | 0.25923000  | -1.01423200 |
| C | -0.28521800 | 3.50014800  | -0.29387000 |
| C | -1.32034000 | 4.05634300  | -1.05112600 |
| C | 0.97941100  | 4.08549900  | -0.35914800 |
| C | -1.10073800 | 5.16077600  | -1.86489400 |
| H | -2.31481900 | 3.61349300  | -1.00609400 |
| C | 1.22271800  | 5.18981000  | -1.17139300 |
| H | 1.79528300  | 3.66147400  | 0.22630500  |
| C | 0.17367500  | 5.70643800  | -1.91233700 |
| H | -1.89493300 | 5.60285200  | -2.46035100 |
| H | 2.20548100  | 5.64940600  | -1.23470000 |
| C | -1.37251500 | 2.62012800  | 1.81721400  |
| C | -1.54568900 | 3.94026200  | 2.24214000  |

|    |             |             |             |
|----|-------------|-------------|-------------|
| C  | -1.93531900 | 1.60534600  | 2.60434000  |
| C  | -2.26045000 | 4.24714600  | 3.39615900  |
| H  | -1.11448100 | 4.75541100  | 1.66572200  |
| C  | -2.65806100 | 1.89019900  | 3.75516200  |
| H  | -1.82198000 | 0.56459700  | 2.30893000  |
| C  | -2.80969900 | 3.21420700  | 4.13324200  |
| H  | -2.39663400 | 5.27395300  | 3.72466200  |
| H  | -3.10476100 | 1.10099300  | 4.35415500  |
| C  | -4.80487900 | -1.65402100 | -1.90856100 |
| C  | -4.86160200 | -3.02975000 | -1.67966400 |
| C  | -5.14460500 | -1.17341200 | -3.17602300 |
| C  | -5.25279900 | -3.90862900 | -2.68486100 |
| H  | -4.59981700 | -3.42408300 | -0.69919900 |
| C  | -5.54055700 | -2.03359800 | -4.19227700 |
| H  | -5.09437500 | -0.10228900 | -3.37054500 |
| C  | -5.58760800 | -3.39263400 | -3.92497400 |
| H  | -5.30369400 | -4.98121200 | -2.51861100 |
| H  | -5.81310400 | -1.67052800 | -5.17950600 |
| C  | -4.65735800 | -1.12724700 | 0.56338600  |
| C  | -3.71212400 | -1.72764300 | 1.39845200  |
| C  | -5.95971900 | -0.96110400 | 1.04166000  |
| C  | -4.05013100 | -2.14299600 | 2.68334100  |
| H  | -2.68938000 | -1.86673100 | 1.04841600  |
| C  | -6.31677200 | -1.36705000 | 2.32105100  |
| H  | -6.70870900 | -0.50209900 | 0.39665300  |
| C  | -5.34894400 | -1.95164300 | 3.12266200  |
| H  | -3.32195700 | -2.60828700 | 3.34248500  |
| H  | -7.32422100 | -1.23442600 | 2.70596100  |
| F  | 0.25707900  | -1.54167300 | -2.33916900 |
| F  | 0.39412700  | 6.76787300  | -2.70029300 |
| F  | -3.50854600 | 3.50056600  | 5.24029400  |
| F  | -5.97204100 | -4.23167400 | -4.89656900 |
| F  | -5.68129100 | -2.34097600 | 4.36104500  |
| H  | 6.24316700  | -1.96780200 | 3.75271000  |
| H  | 4.92088900  | -0.94786100 | 3.17689600  |
| H  | 3.00803300  | -4.73681900 | -1.46893400 |
| H  | 2.52068300  | -3.06486700 | -1.09604600 |
| Fe | 2.66253100  | -0.35059700 | 0.20498300  |
| C  | 3.09752500  | 0.76270000  | 1.88405600  |
| C  | 2.35554200  | -0.36713100 | 2.26487200  |
| H  | 2.90419500  | -1.24355300 | 2.61870000  |
| H  | 4.18390300  | 0.80250500  | 1.97702600  |
| H  | 2.60849000  | 1.74093300  | 1.88331200  |
| H  | 1.71664000  | -1.52706600 | 0.53421300  |

|   |            |             |            |
|---|------------|-------------|------------|
| C | 0.97350300 | -0.25153600 | 2.83405200 |
| H | 0.49000000 | 0.67673600  | 2.51389300 |
| H | 0.32705900 | -1.09008600 | 2.54403000 |
| H | 1.00893300 | -0.22166200 | 3.93320600 |

5 Gsolv= -4011.653591

|   |             |             |             |
|---|-------------|-------------|-------------|
| C | -3.09270500 | -1.98393200 | -1.94558800 |
| C | -3.92298000 | -2.77673300 | -2.76468400 |
| C | -5.24650600 | -2.43355300 | -2.93632400 |
| C | -5.75574400 | -1.26666100 | -2.32710800 |
| C | -4.91218400 | -0.53210600 | -1.51727200 |
| N | -3.63977900 | -0.91797800 | -1.27695700 |
| H | -5.88820800 | -3.03725800 | -3.57240200 |
| H | -3.51158800 | -3.64258600 | -3.27811000 |
| H | -6.77590000 | -0.94265600 | -2.51262100 |
| C | -5.22619000 | 0.76780600  | -0.92005300 |
| C | -1.68722100 | -2.05975200 | -1.78760900 |
| C | -6.57864800 | 1.36499800  | -1.12369700 |
| H | -6.76460500 | 1.51831600  | -2.19401900 |
| H | -7.35823300 | 0.68658000  | -0.75684000 |
| H | -6.68089000 | 2.32674800  | -0.61649600 |
| C | -0.84880100 | -3.04651100 | -2.52892500 |
| H | 0.01720300  | -3.36532300 | -1.93792100 |
| H | -1.41773600 | -3.94384900 | -2.79231800 |
| H | -0.46268200 | -2.60812300 | -3.46102700 |
| N | -4.23841200 | 1.34317300  | -0.29791100 |
| N | -1.16573900 | -1.08018900 | -1.01857200 |
| C | -4.38976300 | 2.66792500  | 0.20333300  |
| C | -4.92240000 | 2.89725000  | 1.48204900  |
| C | -3.93012600 | 3.72313200  | -0.60037300 |
| C | -4.93583000 | 4.20743700  | 1.96308300  |
| C | -3.95656900 | 5.01553700  | -0.07617100 |
| C | -4.44328100 | 5.26008800  | 1.20162700  |
| H | -5.34147700 | 4.39464900  | 2.95650000  |
| H | -3.58730400 | 5.83713200  | -0.68913400 |
| H | -4.45120900 | 6.27226300  | 1.59940400  |
| C | 0.23484600  | -0.91352600 | -1.01080700 |
| C | 0.81352100  | -0.12840400 | -2.00707800 |
| C | 1.07385000  | -1.37710600 | 0.01806800  |
| C | 2.13622200  | 0.27744300  | -1.99081400 |
| C | 2.41458600  | -0.99990200 | 0.01813400  |
| C | 2.95210200  | -0.14760800 | -0.94672500 |
| H | 2.49562100  | 0.93993000  | -2.77499200 |
| H | 3.05231700  | -1.31738300 | 0.84410200  |



|   |             |             |             |
|---|-------------|-------------|-------------|
| C | -5.47734800 | 1.78006900  | 2.31339600  |
| H | -6.25039000 | 1.21131100  | 1.77964500  |
| C | -3.45878600 | 3.47103100  | -2.00031900 |
| H | -4.30613700 | 3.31506300  | -2.68391700 |
| C | 0.50389800  | -2.27165400 | 1.10386800  |
| H | -0.55675700 | -1.99418000 | 1.19474100  |
| C | 4.35107200  | 0.39497300  | -0.72138300 |
| H | 4.98288800  | -0.46346900 | -0.43992900 |
| C | 0.51047400  | -3.72479200 | 0.66652400  |
| C | 1.66217100  | -4.32669300 | 0.15089800  |
| C | -0.65259600 | -4.48984700 | 0.76696300  |
| C | 1.65369900  | -5.65076000 | -0.27033700 |
| H | 2.57862900  | -3.74457900 | 0.06412900  |
| C | -0.68424300 | -5.81610700 | 0.34732300  |
| H | -1.55552000 | -4.03510000 | 1.17412100  |
| C | 0.47379000  | -6.37163400 | -0.16895900 |
| H | 2.54015900  | -6.12884600 | -0.67823800 |
| H | -1.58681400 | -6.41754200 | 0.41281600  |
| C | 1.13741600  | -2.03147200 | 2.46686100  |
| C | 1.54330000  | -3.07307200 | 3.30072600  |
| C | 1.27988400  | -0.71672700 | 2.93353700  |
| C | 2.07893300  | -2.82176700 | 4.56200800  |
| H | 1.44076900  | -4.10392200 | 2.96866900  |
| C | 1.81431600  | -0.44578500 | 4.18487100  |
| H | 0.98328700  | 0.11477800  | 2.29295400  |
| C | 2.20623600  | -1.51082100 | 4.98180000  |
| H | 2.39835000  | -3.62841000 | 5.21635800  |
| H | 1.93652200  | 0.57252900  | 4.54456400  |
| C | 4.96757800  | 0.99506100  | -1.96995200 |
| C | 4.89069100  | 2.35971100  | -2.25363300 |
| C | 5.58191100  | 0.15292100  | -2.90035700 |
| C | 5.41749900  | 2.87792000  | -3.43240100 |
| H | 4.41414400  | 3.03121400  | -1.54124200 |
| C | 6.11709000  | 0.65065500  | -4.08173500 |
| H | 5.63917200  | -0.91568600 | -2.69442100 |
| C | 6.02409800  | 2.01161200  | -4.32574100 |
| H | 5.36690100  | 3.93836300  | -3.66393500 |
| H | 6.60303100  | 0.00647800  | -4.80950200 |
| C | 4.37636700  | 1.34711800  | 0.46757600  |
| C | 3.24044800  | 2.02943000  | 0.91035500  |
| C | 5.58498900  | 1.56418400  | 1.13467500  |
| C | 3.30052500  | 2.89546600  | 1.99853900  |
| H | 2.28385600  | 1.88076000  | 0.40812200  |
| C | 5.66625400  | 2.42449200  | 2.22202600  |

|    |             |             |             |
|----|-------------|-------------|-------------|
| H  | 6.48069300  | 1.04487400  | 0.79410500  |
| C  | 4.51492700  | 3.07497000  | 2.63792100  |
| H  | 2.41820400  | 3.42416800  | 2.35328500  |
| H  | 6.59929100  | 2.59303500  | 2.75286200  |
| F  | 0.02528000  | 0.30292700  | -3.00446600 |
| F  | 0.45531600  | -7.64567800 | -0.58428300 |
| F  | 2.72626600  | -1.26024800 | 6.19171600  |
| F  | 6.54031400  | 2.50369800  | -5.46052500 |
| F  | 4.58157100  | 3.90060800  | 3.69155600  |
| C  | -1.15269400 | 1.56581000  | 0.20171900  |
| H  | -1.23966000 | 2.08395200  | -0.77664000 |
| H  | -5.93162200 | 2.17110100  | 3.22947000  |
| H  | -4.70608100 | 1.05912600  | 2.61182700  |
| H  | -2.88466500 | 4.32217900  | -2.38178800 |
| H  | -2.83193700 | 2.57375200  | -2.07081000 |
| H  | -0.13835500 | 1.13442400  | 0.20471600  |
| Fe | -2.50656500 | 0.08773700  | -0.08282900 |
| C  | -3.24673700 | -1.07048800 | 1.47971500  |
| C  | -2.33633600 | -0.13983800 | 1.97772400  |
| H  | -1.33356700 | -0.43582500 | 2.28580000  |
| H  | -2.68676100 | 0.76929500  | 2.46648800  |
| H  | -4.32363700 | -0.91747600 | 1.56519200  |
| H  | -2.95298400 | -2.10955000 | 1.31628400  |
| C  | -1.18974800 | 2.62207400  | 1.29747200  |
| H  | -2.22051400 | 2.92151900  | 1.54038900  |
| H  | -0.77597900 | 2.20241700  | 2.23023800  |
| C  | -0.40629700 | 3.87546100  | 0.92700700  |
| H  | 0.63059900  | 3.63319300  | 0.64969200  |
| H  | -0.85927100 | 4.37165600  | 0.05656200  |
| H  | -0.37545700 | 4.60902800  | 1.74438100  |

**6** Gsolv= -4011.688819

|   |            |             |             |
|---|------------|-------------|-------------|
| C | 3.23613000 | 2.62662300  | -1.33722700 |
| C | 4.16704000 | 3.66805200  | -1.48797300 |
| C | 5.51924500 | 3.34628100  | -1.58421800 |
| C | 5.96437000 | 2.02434200  | -1.52558800 |
| C | 5.00803900 | 1.01009700  | -1.37615800 |
| N | 3.68765500 | 1.33871500  | -1.30844900 |
| H | 6.24650400 | 4.14675200  | -1.70216100 |
| H | 3.84010000 | 4.70338900  | -1.52744000 |
| H | 7.02242400 | 1.78450700  | -1.59029400 |
| C | 5.19373400 | -0.39772100 | -1.22465500 |
| C | 1.82805700 | 2.67704000  | -1.13300600 |
| C | 6.55785700 | -0.99308500 | -1.14201800 |

|   |             |             |             |
|---|-------------|-------------|-------------|
| H | 7.09957500  | -0.89022900 | -2.09313300 |
| H | 7.16028100  | -0.48013700 | -0.38032200 |
| H | 6.52504900  | -2.05565300 | -0.88635600 |
| C | 1.07478100  | 3.95266100  | -0.99835700 |
| H | 0.44904800  | 3.94589200  | -0.09543800 |
| H | 1.75625900  | 4.80508400  | -0.92302900 |
| H | 0.40824400  | 4.12610300  | -1.85411200 |
| N | 4.03825300  | -1.09632800 | -1.10882500 |
| N | 1.24128100  | 1.45428900  | -0.99780600 |
| C | 4.08428100  | -2.49071500 | -0.83836700 |
| C | 3.85840500  | -2.91900000 | 0.47991100  |
| C | 4.26592500  | -3.41328100 | -1.87981000 |
| C | 3.82046100  | -4.28713000 | 0.74443100  |
| C | 4.22369500  | -4.77501600 | -1.57518000 |
| C | 4.00297300  | -5.21386400 | -0.27572400 |
| H | 3.64281100  | -4.62302800 | 1.76544400  |
| H | 4.35988200  | -5.49713800 | -2.37952300 |
| H | 3.96759300  | -6.27910100 | -0.05829600 |
| C | -0.12270800 | 1.40610000  | -0.63930300 |
| C | -1.12304000 | 1.66292000  | -1.56899100 |
| C | -0.52158600 | 0.99928800  | 0.64927800  |
| C | -2.47283700 | 1.51132400  | -1.29640500 |
| C | -1.87548700 | 0.87045700  | 0.93648200  |
| C | -2.86506700 | 1.10285200  | -0.02509900 |
| H | -3.19027800 | 1.70545300  | -2.08983800 |
| H | -2.17647800 | 0.53846600  | 1.93091600  |
| C | 3.65634400  | -1.91078400 | 1.56862900  |
| H | 4.56165700  | -1.31197800 | 1.74364500  |
| C | 4.49799500  | -2.94824600 | -3.28465700 |
| H | 5.48652900  | -2.48486000 | -3.40637300 |
| C | 0.55919900  | 0.72268400  | 1.67990000  |
| H | 1.36614700  | 0.22212100  | 1.11953300  |
| C | -4.31838700 | 0.87218300  | 0.35552600  |
| H | -4.50134300 | 1.48375400  | 1.25502000  |
| C | 1.14978000  | 2.02318200  | 2.18699900  |
| C | 0.33104500  | 3.04755400  | 2.67235500  |
| C | 2.52729500  | 2.23997200  | 2.13398900  |
| C | 0.86860800  | 4.25678800  | 3.09839100  |
| H | -0.74811000 | 2.89943700  | 2.70524900  |
| C | 3.08476500  | 3.44766000  | 2.54085100  |
| H | 3.18046300  | 1.45565700  | 1.74849000  |
| C | 2.24074200  | 4.43623100  | 3.01790600  |
| H | 0.24386600  | 5.06089100  | 3.47767900  |
| H | 4.15419900  | 3.63205100  | 2.48466200  |

|   |             |             |             |
|---|-------------|-------------|-------------|
| C | 0.12945700  | -0.26099600 | 2.75142600  |
| C | 0.01884800  | 0.06811900  | 4.10090300  |
| C | -0.16265800 | -1.57453200 | 2.35899100  |
| C | -0.37755300 | -0.88033400 | 5.04191300  |
| H | 0.25262600  | 1.07685800  | 4.43433600  |
| C | -0.55923100 | -2.53233300 | 3.28020000  |
| H | -0.07855000 | -1.84738900 | 1.30516800  |
| C | -0.66126900 | -2.16376100 | 4.61393800  |
| H | -0.46531300 | -0.63486200 | 6.09682100  |
| H | -0.78712200 | -3.55292500 | 2.98507700  |
| C | -5.28917500 | 1.36354400  | -0.70064100 |
| C | -5.68639900 | 0.54765300  | -1.76280100 |
| C | -5.75618200 | 2.67824800  | -0.65643000 |
| C | -6.52976100 | 1.02722300  | -2.75812100 |
| H | -5.33234200 | -0.48156800 | -1.81050400 |
| C | -6.60422200 | 3.17611400  | -1.63943500 |
| H | -5.44692000 | 3.32674100  | 0.16283500  |
| C | -6.97556200 | 2.33658100  | -2.67631500 |
| H | -6.84746200 | 0.40374100  | -3.58939000 |
| H | -6.97934000 | 4.19552000  | -1.61297700 |
| C | -4.61081600 | -0.56734400 | 0.75901600  |
| C | -3.78350200 | -1.64045400 | 0.42616100  |
| C | -5.79008800 | -0.83121600 | 1.46326700  |
| C | -4.11786000 | -2.94456800 | 0.78317500  |
| H | -2.85287200 | -1.46321300 | -0.11146700 |
| C | -6.13988200 | -2.12267900 | 1.83171400  |
| H | -6.44972900 | -0.00330000 | 1.72302800  |
| C | -5.29196700 | -3.16244400 | 1.48105800  |
| H | -3.47754800 | -3.78676800 | 0.53275000  |
| H | -7.05130400 | -2.33588400 | 2.38360200  |
| F | -0.75922100 | 2.03398000  | -2.80656100 |
| F | 2.76492600  | 5.60534200  | 3.41004400  |
| F | -1.04159700 | -3.08217000 | 5.51252700  |
| F | -7.79450600 | 2.80386400  | -3.62838100 |
| F | -5.61929100 | -4.41309500 | 1.83343500  |
| C | 1.21002200  | -1.62126300 | -1.48024900 |
| H | 1.24569800  | -2.25259700 | -0.57087700 |
| H | 1.76908600  | -2.21374000 | -2.22862800 |
| C | -0.22506000 | -1.49049400 | -1.95988900 |
| H | -0.84177100 | -0.97135800 | -1.21039600 |
| H | -0.26661300 | -0.85278600 | -2.86074000 |
| C | -0.90234300 | -2.81924800 | -2.27942800 |
| H | -0.25403700 | -3.42014800 | -2.93901900 |
| H | -1.00272000 | -3.40748900 | -1.34900900 |

|    |             |             |             |
|----|-------------|-------------|-------------|
| H  | 3.37588100  | -2.38745800 | 2.51359100  |
| H  | 2.86104300  | -1.19753000 | 1.30387400  |
| H  | 4.44041500  | -3.78495300 | -3.98858000 |
| H  | 3.76038500  | -2.19486300 | -3.58926300 |
| Fe | 2.42113400  | -0.05952900 | -1.16627900 |
| C  | -2.26701500 | -2.65158800 | -2.93362000 |
| H  | -2.89516900 | -1.99708900 | -2.30632300 |
| H  | -2.14041100 | -2.11246600 | -3.88516300 |
| C  | -2.97881200 | -3.97027600 | -3.17856200 |
| H  | -3.16105700 | -4.50597100 | -2.23732400 |
| H  | -3.94884000 | -3.83090300 | -3.66993400 |
| H  | -2.37677100 | -4.63166400 | -3.81566900 |

7 Gsolv= -4011.639443

|   |             |             |             |
|---|-------------|-------------|-------------|
| C | 3.18528600  | 1.70891200  | -1.84286800 |
| C | 3.98188000  | 2.57898700  | -2.58646700 |
| C | 5.36750700  | 2.44591700  | -2.52721200 |
| C | 5.94602000  | 1.41614400  | -1.77583200 |
| C | 5.11617400  | 0.57094100  | -1.05237100 |
| N | 3.76814900  | 0.76370800  | -1.05230400 |
| H | 6.00059600  | 3.12291100  | -3.09446200 |
| H | 3.52893700  | 3.34701700  | -3.20895400 |
| H | 7.02335000  | 1.26890400  | -1.77462700 |
| C | 5.46529500  | -0.64871300 | -0.35515800 |
| C | 1.75229800  | 1.58139400  | -1.82631400 |
| C | 6.86503200  | -1.16371900 | -0.39068000 |
| H | 7.17876900  | -1.35144400 | -1.42638600 |
| H | 7.56365700  | -0.42699500 | 0.02599700  |
| H | 6.97377000  | -2.09558400 | 0.16898400  |
| C | 0.91477600  | 2.23698900  | -2.87070800 |
| H | -0.08537600 | 2.49437400  | -2.51219100 |
| H | 1.38540400  | 3.15038000  | -3.24623000 |
| H | 0.79232000  | 1.55505300  | -3.72549500 |
| N | 4.42719900  | -1.27507400 | 0.16741800  |
| N | 1.29889300  | 0.69606800  | -0.93553600 |
| C | 4.60216300  | -2.58755200 | 0.70243400  |
| C | 5.06590900  | -2.78936000 | 2.01213400  |
| C | 4.25469800  | -3.66926000 | -0.12465900 |
| C | 5.14997200  | -4.10117700 | 2.48586700  |
| C | 4.35242600  | -4.96100300 | 0.38999600  |
| C | 4.79132900  | -5.18080200 | 1.69022000  |
| H | 5.50804700  | -4.26653400 | 3.50135800  |
| H | 4.08007900  | -5.80188900 | -0.24666400 |
| H | 4.86089000  | -6.19374300 | 2.08044800  |

|   |             |             |             |
|---|-------------|-------------|-------------|
| C | -0.09891700 | 0.44129500  | -0.95521300 |
| C | -0.56409900 | -0.60092000 | -1.75403300 |
| C | -1.04576500 | 1.17905800  | -0.21569700 |
| C | -1.89675900 | -0.96920000 | -1.83094900 |
| C | -2.39137700 | 0.84070400  | -0.34020900 |
| C | -2.83344600 | -0.23462200 | -1.11212900 |
| H | -2.17569000 | -1.81292900 | -2.45798300 |
| H | -3.13191400 | 1.40090000  | 0.23028800  |
| C | 5.47619100  | -1.64761800 | 2.89479600  |
| H | 6.17038400  | -0.95982000 | 2.39587000  |
| C | 3.80218100  | -3.42762000 | -1.53096400 |
| H | 4.59828900  | -2.98077900 | -2.14320700 |
| C | -0.59739200 | 2.33051000  | 0.67582400  |
| H | 0.39669500  | 2.04341200  | 1.05238900  |
| C | -4.30902000 | -0.59530900 | -1.05277600 |
| H | -4.86350700 | 0.34070000  | -1.22960800 |
| C | -0.37037600 | 3.59733000  | -0.12980000 |
| C | -1.40179000 | 4.18079700  | -0.87121300 |
| C | 0.88629500  | 4.20362700  | -0.14025700 |
| C | -1.18610600 | 5.33320700  | -1.61687200 |
| H | -2.39008400 | 3.72212000  | -0.86772100 |
| C | 1.12533800  | 5.35614300  | -0.88396300 |
| H | 1.69859300  | 3.75987900  | 0.43566900  |
| C | 0.08036600  | 5.89897800  | -1.61195100 |
| H | -1.97751000 | 5.79740100  | -2.19904300 |
| H | 2.10186000  | 5.83275200  | -0.90401400 |
| C | -1.47875200 | 2.56037400  | 1.90338700  |
| C | -1.67283800 | 3.84544400  | 2.41714800  |
| C | -2.04597700 | 1.48746300  | 2.60613100  |
| C | -2.40955500 | 4.06406800  | 3.57740700  |
| H | -1.23960500 | 4.70287300  | 1.90728100  |
| C | -2.79017900 | 1.68454400  | 3.76174400  |
| H | -1.92480700 | 0.46989600  | 2.23956500  |
| C | -2.96034800 | 2.97683300  | 4.23047000  |
| H | -2.56075400 | 5.06398900  | 3.97503500  |
| H | -3.23794300 | 0.85124200  | 4.29693600  |
| C | -4.73195100 | -1.55729400 | -2.14723200 |
| C | -4.82885600 | -2.93402200 | -1.94138000 |
| C | -4.97907800 | -1.05568600 | -3.42850000 |
| C | -5.16806300 | -3.79339700 | -2.98209900 |
| H | -4.64436300 | -3.34725800 | -0.95160400 |
| C | -5.32082800 | -1.89580800 | -4.48018400 |
| H | -4.89715800 | 0.01671400  | -3.60478300 |
| C | -5.40940900 | -3.25717900 | -4.23474000 |

|    |             |             |             |
|----|-------------|-------------|-------------|
| H  | -5.25023800 | -4.86656400 | -2.83300900 |
| H  | -5.52026500 | -1.51587700 | -5.47847000 |
| C  | -4.69635600 | -1.05936100 | 0.34155700  |
| C  | -3.83390300 | -1.82788200 | 1.12854100  |
| C  | -5.95286700 | -0.73222900 | 0.85479100  |
| C  | -4.21153400 | -2.26157300 | 2.39491900  |
| H  | -2.84393600 | -2.08660000 | 0.75210700  |
| C  | -6.34736900 | -1.15057300 | 2.12048400  |
| H  | -6.63598000 | -0.13493000 | 0.25165900  |
| C  | -5.46521500 | -1.91146000 | 2.86970500  |
| H  | -3.54963800 | -2.86217200 | 3.01411500  |
| H  | -7.31923300 | -0.89389400 | 2.53305200  |
| F  | 0.32618700  | -1.27911500 | -2.49222700 |
| F  | 0.29698400  | 7.00653200  | -2.33457700 |
| F  | -3.67966100 | 3.17812000  | 5.34309800  |
| F  | -5.74209100 | -4.07692100 | -5.24106900 |
| F  | -5.83359700 | -2.31769100 | 4.09205800  |
| H  | 5.97103800  | -2.01935500 | 3.79815000  |
| H  | 4.61463600  | -1.04739600 | 3.21378100  |
| H  | 3.49052800  | -4.35941500 | -2.01363100 |
| H  | 2.95666600  | -2.72465100 | -1.54951100 |
| Fe | 2.69545500  | -0.37258400 | -0.03644600 |
| C  | 2.86609600  | 0.55949100  | 1.69872500  |
| C  | 2.17083500  | -0.66555000 | 1.88629800  |
| H  | 2.74283500  | -1.50665900 | 2.28920100  |
| H  | 3.91377800  | 0.66780300  | 1.99009600  |
| H  | 2.30198700  | 1.49516800  | 1.77069900  |
| H  | 1.81701000  | -1.60193400 | 0.21687600  |
| C  | 0.74356800  | -0.65627300 | 2.36436900  |
| H  | 0.24417100  | 0.24106500  | 1.98169300  |
| H  | 0.76386300  | -0.53363800 | 3.46277200  |
| C  | -0.10192800 | -1.87895900 | 2.03553700  |
| H  | -1.10160800 | -1.73510100 | 2.47765900  |
| H  | -0.24776600 | -1.93504400 | 0.94456600  |
| C  | 0.49163000  | -3.18326400 | 2.54053800  |
| H  | -0.19359900 | -4.02574200 | 2.38705000  |
| H  | 1.42724800  | -3.42540800 | 2.02043900  |
| H  | 0.71441500  | -3.12780500 | 3.61530000  |

**8** Gsolv= -4090.148986

|   |            |            |             |
|---|------------|------------|-------------|
| C | 3.10681700 | 2.25856400 | -1.84749700 |
| C | 3.94067900 | 3.15143100 | -2.52003700 |
| C | 5.29419900 | 2.85444900 | -2.64961100 |
| C | 5.80133800 | 1.66389200 | -2.11781500 |

|   |             |             |             |
|---|-------------|-------------|-------------|
| C | 4.93671500  | 0.80202200  | -1.45893700 |
| N | 3.61599700  | 1.10431500  | -1.32609600 |
| H | 5.95456100  | 3.54238400  | -3.17029600 |
| H | 3.53695900  | 4.06769800  | -2.94337800 |
| H | 6.85421900  | 1.41383800  | -2.22429800 |
| C | 5.23722800  | -0.50109200 | -0.90891200 |
| C | 1.68506500  | 2.33694800  | -1.65816000 |
| C | 6.59934900  | -1.08881200 | -1.07626000 |
| H | 6.85368200  | -1.18045300 | -2.14023300 |
| H | 7.35846500  | -0.43908100 | -0.62224600 |
| H | 6.67847300  | -2.07844800 | -0.62050700 |
| C | 0.86517600  | 3.38786900  | -2.32640400 |
| H | -0.04285000 | 3.61528200  | -1.75859800 |
| H | 1.42944600  | 4.31834900  | -2.44491800 |
| H | 0.55641100  | 3.05704100  | -3.32829400 |
| N | 4.20769400  | -1.09933100 | -0.34277800 |
| N | 1.18272500  | 1.33621100  | -0.94282200 |
| C | 4.36135300  | -2.45896500 | 0.06415400  |
| C | 4.79938300  | -2.77549500 | 1.36030900  |
| C | 4.02523600  | -3.46354700 | -0.85775400 |
| C | 4.81973800  | -4.11824400 | 1.74067400  |
| C | 4.05005500  | -4.79227000 | -0.43257700 |
| C | 4.43013500  | -5.12244500 | 0.86222900  |
| H | 5.15261100  | -4.37157100 | 2.74652900  |
| H | 3.76796700  | -5.57408900 | -1.13739400 |
| H | 4.43967200  | -6.16216900 | 1.18182400  |
| C | -0.22907600 | 1.19896200  | -0.91789200 |
| C | -0.83157700 | 0.52935000  | -1.98133500 |
| C | -1.04222300 | 1.57153000  | 0.16510400  |
| C | -2.15773000 | 0.13753800  | -1.98465100 |
| C | -2.38794000 | 1.20995300  | 0.14625400  |
| C | -2.94948000 | 0.46000600  | -0.88720800 |
| H | -2.53557100 | -0.44189200 | -2.82383800 |
| H | -3.01165100 | 1.45828900  | 1.00533500  |
| C | 5.28027200  | -1.71533800 | 2.30564000  |
| H | 6.07170200  | -1.09984700 | 1.85730500  |
| C | 3.68936200  | -3.12833000 | -2.28019400 |
| H | 4.60062200  | -3.03371300 | -2.88864600 |
| C | -0.45753800 | 2.38087100  | 1.30999700  |
| H | 0.58878100  | 2.05978200  | 1.41327200  |
| C | -4.34043600 | -0.11046500 | -0.68521500 |
| H | -4.95833300 | 0.69791500  | -0.26137500 |
| C | -0.40100600 | 3.85399700  | 0.94802700  |
| C | -1.51400200 | 4.52309200  | 0.43000100  |



|   |             |             |             |
|---|-------------|-------------|-------------|
| C | 0.78194700  | 4.57157400  | 1.13129600  |
| C | -1.44805900 | 5.86848800  | 0.08763500  |
| H | -2.44544200 | 3.97837900  | 0.28059600  |
| C | 0.87045800  | 5.91830600  | 0.79253400  |
| H | 1.65386300  | 4.06481500  | 1.54442900  |
| C | -0.25019200 | 6.54191000  | 0.27139300  |
| H | -2.30398100 | 6.39945100  | -0.32016100 |
| H | 1.78848000  | 6.48423600  | 0.92536500  |
| C | -1.13170700 | 2.09968900  | 2.64625600  |
| C | -1.54656200 | 3.11592600  | 3.50659100  |
| C | -1.31114200 | 0.77144400  | 3.05812900  |
| C | -2.12653800 | 2.82695300  | 4.73999600  |
| H | -1.41594300 | 4.15679400  | 3.21878500  |
| C | -1.89099500 | 0.46284600  | 4.27971400  |
| H | -1.00872100 | -0.04180000 | 2.39790000  |
| C | -2.29038000 | 1.50377100  | 5.10450000  |
| H | -2.45244800 | 3.61415500  | 5.41445800  |
| H | -2.04113000 | -0.56597700 | 4.59583900  |
| C | -5.00732400 | -0.53473100 | -1.97953900 |
| C | -4.95572100 | -1.84911500 | -2.44694900 |
| C | -5.64815200 | 0.42828800  | -2.76346400 |
| C | -5.53165900 | -2.20064000 | -3.66370800 |
| H | -4.46086000 | -2.61408500 | -1.85084900 |
| C | -6.23270500 | 0.09727800  | -3.97935800 |
| H | -5.68806800 | 1.45930500  | -2.41273600 |
| C | -6.16265500 | -1.21873100 | -4.40804900 |
| H | -5.50067400 | -3.22041600 | -4.03750400 |
| H | -6.73963900 | 0.83622800  | -4.59393200 |
| C | -4.31355000 | -1.21926800 | 0.35963500  |
| C | -3.16115300 | -1.95732800 | 0.64096500  |
| C | -5.48747000 | -1.52962100 | 1.05133200  |
| C | -3.17035500 | -2.97090000 | 1.59475300  |
| H | -2.22981900 | -1.73783500 | 0.11807600  |
| C | -5.51772200 | -2.53704100 | 2.00716700  |
| H | -6.39635100 | -0.96802100 | 0.83591900  |
| C | -4.35142900 | -3.24104400 | 2.26433800  |
| H | -2.27296800 | -3.54437800 | 1.82204300  |
| H | -6.42299700 | -2.78004700 | 2.55688600  |
| F | -0.06165900 | 0.18994500  | -3.02713900 |
| F | -0.17632500 | 7.83651200  | -0.06628200 |
| F | -2.85416900 | 1.21681600  | 6.28622500  |
| F | -6.72625400 | -1.55040900 | -5.57774600 |
| F | -4.36977500 | -4.20897000 | 3.19069200  |
| C | 1.16286900  | -1.51744900 | -0.24427700 |

|    |             |             |             |
|----|-------------|-------------|-------------|
| H  | 1.37348100  | -1.90142700 | -1.26873900 |
| H  | 5.68909700  | -2.16749600 | 3.21519000  |
| H  | 4.48271300  | -1.02690100 | 2.60855900  |
| H  | 3.07641900  | -3.91266900 | -2.73787600 |
| H  | 3.15202500  | -2.17712900 | -2.36497900 |
| H  | 0.14510900  | -1.09827800 | -0.29505300 |
| Fe | 2.50395300  | -0.02887000 | -0.31199700 |
| C  | 3.05084100  | 0.99882000  | 1.31454800  |
| C  | 2.16544700  | -0.04565400 | 1.64848400  |
| H  | 1.13422200  | 0.17443600  | 1.92933500  |
| H  | 2.53996500  | -0.94886900 | 2.13151300  |
| H  | 4.12168300  | 0.90773400  | 1.51023800  |
| H  | 2.70442100  | 2.03501400  | 1.27466200  |
| C  | 1.08908100  | -2.69653900 | 0.71297200  |
| H  | 2.08778600  | -3.05905900 | 0.99993300  |
| H  | 0.61225600  | -2.36936200 | 1.65567100  |
| C  | 0.29937400  | -3.88125500 | 0.16800300  |
| H  | -0.71478500 | -3.55241900 | -0.12397000 |
| H  | 0.77263600  | -4.23271200 | -0.76560100 |
| C  | 0.19678800  | -5.04504100 | 1.14256000  |
| H  | -0.25242700 | -4.69266500 | 2.08615000  |
| H  | 1.21338500  | -5.37754900 | 1.40663400  |
| C  | -0.60712200 | -6.20989100 | 0.59177900  |
| H  | -1.63425700 | -5.90402000 | 0.34975200  |
| H  | -0.15830100 | -6.59557300 | -0.33330900 |
| H  | -0.66979500 | -7.04306400 | 1.30161500  |

9 Gsolv= -4090.203188

|   |             |             |             |
|---|-------------|-------------|-------------|
| C | -3.66299800 | -1.96775500 | -1.94270000 |
| C | -4.71714500 | -2.79459100 | -2.36492600 |
| C | -5.99735000 | -2.25222200 | -2.45305700 |
| C | -6.25230500 | -0.91910500 | -2.12580300 |
| C | -5.17712300 | -0.12244800 | -1.70924100 |
| N | -3.92695000 | -0.66099900 | -1.64862500 |
| H | -6.81914400 | -2.88526400 | -2.78075800 |
| H | -4.53818500 | -3.83574800 | -2.61874500 |
| H | -7.25623900 | -0.50778100 | -2.18945600 |
| C | -5.17264400 | 1.23542000  | -1.26642900 |
| C | -2.29514100 | -2.27813300 | -1.69696800 |
| C | -6.43999700 | 2.00825900  | -1.13062700 |
| H | -6.90648500 | 2.19075100  | -2.10927200 |
| H | -7.17301700 | 1.45032100  | -0.53267300 |
| H | -6.27858600 | 2.97619800  | -0.64850600 |
| C | -1.74264400 | -3.65460500 | -1.81068500 |

|   |             |             |             |
|---|-------------|-------------|-------------|
| H | -1.18428400 | -3.92870500 | -0.90515900 |
| H | -2.54177700 | -4.39016300 | -1.94166800 |
| H | -1.05200500 | -3.74863300 | -2.65938800 |
| N | -3.94345500 | 1.70492500  | -0.94253100 |
| N | -1.55198700 | -1.21681900 | -1.27784400 |
| C | -3.81326800 | 3.00798600  | -0.38988100 |
| C | -3.63481400 | 3.12285600  | 0.99816500  |
| C | -3.77868800 | 4.13785700  | -1.22114700 |
| C | -3.42322500 | 4.38622300  | 1.54736700  |
| C | -3.56743500 | 5.38689700  | -0.63395700 |
| C | -3.39051200 | 5.51597900  | 0.73782500  |
| H | -3.28129700 | 4.47754400  | 2.62362400  |
| H | -3.53516400 | 6.26838900  | -1.27342200 |
| H | -3.22131600 | 6.49706700  | 1.17611300  |
| C | -0.22193100 | -1.45097300 | -0.86892000 |
| C | 0.79732800  | -1.64356200 | -1.79275000 |
| C | 0.13886400  | -1.38361800 | 0.49109500  |
| C | 2.13511900  | -1.72340400 | -1.44209300 |
| C | 1.47662700  | -1.49209700 | 0.85208500  |
| C | 2.49362700  | -1.63178000 | -0.09996200 |
| H | 2.87308500  | -1.83317200 | -2.23273600 |
| H | 1.74679500  | -1.41566400 | 1.90576800  |
| C | -3.66301400 | 1.89596200  | 1.85550600  |
| H | -4.65405900 | 1.42006700  | 1.85607800  |
| C | -3.96299700 | 4.00810800  | -2.70208600 |
| H | -5.00043000 | 3.76237100  | -2.96705800 |
| C | -0.96889900 | -1.17599300 | 1.50759800  |
| H | -1.65697400 | -0.46125300 | 1.02511000  |
| C | 3.94110200  | -1.65785200 | 0.36615600  |
| H | 4.03750300  | -2.52632200 | 1.03939900  |
| C | -1.76636100 | -2.45051400 | 1.69931400  |
| C | -1.13297300 | -3.67120500 | 1.95114800  |
| C | -3.15717800 | -2.43320400 | 1.58381600  |
| C | -1.86421800 | -4.84619100 | 2.08605900  |
| H | -0.04643200 | -3.70440300 | 2.02906000  |
| C | -3.90654600 | -3.59909400 | 1.69896900  |
| H | -3.66812200 | -1.49095600 | 1.38046800  |
| C | -3.24222800 | -4.78801700 | 1.94945700  |
| H | -1.38437000 | -5.80147000 | 2.28097200  |
| H | -4.98752100 | -3.59766600 | 1.58853400  |
| C | -0.49871000 | -0.50362400 | 2.78249100  |
| C | -0.48679100 | -1.13268000 | 4.02586900  |
| C | -0.05863600 | 0.82459100  | 2.70166500  |
| C | -0.04738400 | -0.46257000 | 5.16586800  |

|   |             |             |             |
|---|-------------|-------------|-------------|
| H | -0.83479600 | -2.15936700 | 4.11739200  |
| C | 0.37962200  | 1.50919400  | 3.82553100  |
| H | -0.06397200 | 1.33051200  | 1.73367300  |
| C | 0.37853700  | 0.84711700  | 5.04473400  |
| H | -0.03599300 | -0.94225400 | 6.14080800  |
| H | 0.71740400  | 2.54073100  | 3.77422100  |
| C | 4.92265500  | -1.88051500 | -0.76838100 |
| C | 5.34119700  | -0.81955300 | -1.57651500 |
| C | 5.38704800  | -3.16361000 | -1.05720400 |
| C | 6.20112700  | -1.02779500 | -2.64687400 |
| H | 4.98604600  | 0.18869700  | -1.36283100 |
| C | 6.25333100  | -3.39369900 | -2.12162700 |
| H | 5.06378500  | -4.00088700 | -0.43944700 |
| C | 6.64438100  | -2.31703600 | -2.89904100 |
| H | 6.53329700  | -0.21023900 | -3.28144200 |
| H | 6.62712600  | -4.38718600 | -2.35378500 |
| C | 4.33848100  | -0.43620700 | 1.18763700  |
| C | 3.63380700  | 0.76790200  | 1.16712400  |
| C | 5.50527600  | -0.50773700 | 1.95570600  |
| C | 4.07761000  | 1.87625600  | 1.88438300  |
| H | 2.71277200  | 0.84899600  | 0.59251600  |
| C | 5.96207000  | 0.58278100  | 2.68267200  |
| H | 6.07177000  | -1.43880100 | 1.97571300  |
| C | 5.23676900  | 1.76374100  | 2.63034600  |
| H | 3.52944100  | 2.81538800  | 1.87583600  |
| H | 6.86519500  | 0.53396400  | 3.28487300  |
| F | 0.47383200  | -1.69761400 | -3.09439600 |
| F | -3.95227100 | -5.91898300 | 2.05861800  |
| F | 0.79786800  | 1.50034300  | 6.13687000  |
| F | 7.47981300  | -2.52657100 | -3.92542100 |
| F | 5.67012700  | 2.82224800  | 3.32820400  |
| C | -1.05679900 | 1.85575200  | -1.08815700 |
| H | -1.09861000 | 2.32124700  | -0.08364500 |
| H | -1.45938200 | 2.64251900  | -1.75390400 |
| C | 0.38972400  | 1.60162300  | -1.47244300 |
| H | 0.84099000  | 0.84909400  | -0.80882500 |
| H | 0.44248200  | 1.16319200  | -2.48465700 |
| C | 1.28280400  | 2.83750300  | -1.43142200 |
| H | 0.83114000  | 3.65123400  | -2.02282400 |
| H | 1.32562000  | 3.21365300  | -0.39276000 |
| H | -3.39156500 | 2.12012400  | 2.89219200  |
| H | -2.95776400 | 1.14104300  | 1.47684200  |
| H | -3.70912600 | 4.94345400  | -3.21173000 |
| H | -3.33609100 | 3.21052000  | -3.12040600 |

|    |             |            |             |
|----|-------------|------------|-------------|
| Fe | -2.49329700 | 0.46274900 | -1.14147800 |
| C  | 2.69389500  | 2.56087500 | -1.93052700 |
| H  | 3.10581600  | 1.69360200 | -1.38632300 |
| H  | 2.65330300  | 2.24940900 | -2.98748800 |
| C  | 3.64747800  | 3.73492400 | -1.78234900 |
| H  | 3.63828500  | 4.08643100 | -0.73653400 |
| H  | 3.28555500  | 4.58487900 | -2.38456900 |
| C  | 5.07785000  | 3.40113600 | -2.17920600 |
| H  | 5.45134900  | 2.59657600 | -1.52455300 |
| H  | 5.08509500  | 2.98865700 | -3.20068700 |
| C  | 6.00750800  | 4.59881000 | -2.09585500 |
| H  | 7.03668900  | 4.34191600 | -2.37177600 |
| H  | 5.67614900  | 5.40417600 | -2.76444200 |
| H  | 6.03085200  | 5.00896100 | -1.07770600 |

**10** Gsolv= -3815.398739

|   |             |             |             |
|---|-------------|-------------|-------------|
| C | -2.95502600 | -2.80213900 | -1.09736400 |
| C | -3.79470500 | -3.91976000 | -1.18446700 |
| C | -5.15464100 | -3.71741200 | -1.41745500 |
| C | -5.69234400 | -2.43488400 | -1.55668700 |
| C | -4.82852200 | -1.34013800 | -1.46280500 |
| N | -3.49879700 | -1.55851000 | -1.25250800 |
| H | -5.81370600 | -4.57960700 | -1.48915500 |
| H | -3.39299100 | -4.92376400 | -1.07724500 |
| H | -6.75535900 | -2.28944600 | -1.73102000 |
| C | -5.11099000 | 0.06322300  | -1.52550400 |
| C | -1.55300100 | -2.71639000 | -0.83365700 |
| C | -6.50297100 | 0.57373700  | -1.67029500 |
| H | -6.93646600 | 0.28650300  | -2.63865800 |
| H | -7.15577500 | 0.15126000  | -0.89483100 |
| H | -6.54549300 | 1.66346200  | -1.59132200 |
| C | -0.70926600 | -3.90940200 | -0.55747200 |
| H | 0.04782200  | -3.68624700 | 0.20408600  |
| H | -1.31807800 | -4.74144500 | -0.18883400 |
| H | -0.17688800 | -4.25033100 | -1.45597100 |
| N | -4.01391200 | 0.84141400  | -1.40280800 |
| N | -1.08290600 | -1.44471300 | -0.81383700 |
| C | -4.13677400 | 2.25726900  | -1.34900300 |
| C | -4.09371200 | 2.87546500  | -0.09035700 |
| C | -4.21544400 | 3.00885600  | -2.52933100 |
| C | -4.15912000 | 4.26612800  | -0.02575700 |
| C | -4.28423400 | 4.39866800  | -2.42471600 |
| C | -4.26174400 | 5.02682500  | -1.18507400 |
| H | -4.12347500 | 4.75227000  | 0.94848200  |

|   |             |             |             |
|---|-------------|-------------|-------------|
| H | -4.34563700 | 4.99168600  | -3.33662400 |
| H | -4.31210600 | 6.11166300  | -1.12301000 |
| C | 0.28051200  | -1.19960300 | -0.54836200 |
| C | 1.26740000  | -1.53804400 | -1.46776000 |
| C | 0.68009200  | -0.53113900 | 0.62501400  |
| C | 2.60665100  | -1.23706800 | -1.28545300 |
| C | 2.02384400  | -0.22969700 | 0.81432700  |
| C | 2.99783700  | -0.56687100 | -0.13039600 |
| H | 3.31874800  | -1.52255100 | -2.05642200 |
| H | 2.32536400  | 0.31038200  | 1.71281400  |
| C | -3.94965100 | 2.03659100  | 1.14058600  |
| H | -4.83491600 | 1.40992300  | 1.32056600  |
| C | -4.19132800 | 2.32835400  | -3.86236000 |
| H | -5.06436700 | 1.68039200  | -4.01569800 |
| C | -0.39069200 | -0.19139400 | 1.64475400  |
| H | -1.24512300 | 0.16149100  | 1.04515900  |
| C | 4.42586800  | -0.10580500 | 0.09506500  |
| H | 4.62913500  | -0.24082400 | 1.17010300  |
| C | -0.87047000 | -1.43843600 | 2.35992900  |
| C | 0.02749600  | -2.38049700 | 2.86917400  |
| C | -2.23855200 | -1.68500700 | 2.48948000  |
| C | -0.42258000 | -3.54063200 | 3.49059500  |
| H | 1.09868200  | -2.21090800 | 2.76217900  |
| C | -2.71028200 | -2.84454100 | 3.09388300  |
| H | -2.95312400 | -0.96132700 | 2.09423100  |
| C | -1.78814300 | -3.75385500 | 3.58566400  |
| H | 0.26514500  | -4.28148400 | 3.88933000  |
| H | -3.77280900 | -3.05289000 | 3.18446600  |
| C | -0.01866200 | 0.96862500  | 2.54577700  |
| C | 0.33423700  | 0.81996600  | 3.88583000  |
| C | -0.01520700 | 2.25346500  | 1.98811200  |
| C | 0.68656300  | 1.92346000  | 4.66001400  |
| H | 0.32628500  | -0.16755000 | 4.34315000  |
| C | 0.33210900  | 3.36387300  | 2.74376900  |
| H | -0.29093500 | 2.37732200  | 0.93946100  |
| C | 0.67987900  | 3.17592700  | 4.07329500  |
| H | 0.96022400  | 1.82319100  | 5.70686700  |
| H | 0.33625300  | 4.36554800  | 2.32273900  |
| C | 5.44155800  | -0.95793700 | -0.64351300 |
| C | 5.92620000  | -0.60869500 | -1.90551500 |
| C | 5.86892500  | -2.15958800 | -0.07328000 |
| C | 6.81757700  | -1.43284500 | -2.58494100 |
| H | 5.60530000  | 0.32470700  | -2.36543600 |
| C | 6.76238400  | -2.99432400 | -0.73284900 |

|    |             |             |             |
|----|-------------|-------------|-------------|
| H  | 5.49214100  | -2.44669900 | 0.90815600  |
| C  | 7.22173600  | -2.61233700 | -1.98317000 |
| H  | 7.20380400  | -1.17187300 | -3.56646600 |
| H  | 7.10781100  | -3.92726400 | -0.29583800 |
| C  | 4.59863700  | 1.38014900  | -0.18609500 |
| C  | 3.70307300  | 2.11266300  | -0.96600300 |
| C  | 5.72106100  | 2.03338300  | 0.33330700  |
| C  | 3.91584800  | 3.46470300  | -1.22281600 |
| H  | 2.81762100  | 1.63037300  | -1.37630600 |
| C  | 5.94938900  | 3.38056200  | 0.09057900  |
| H  | 6.43156400  | 1.46979600  | 0.93789300  |
| C  | 5.03606200  | 4.07481100  | -0.68854300 |
| H  | 3.22292100  | 4.04560000  | -1.82535100 |
| H  | 6.81504300  | 3.89892800  | 0.49389400  |
| F  | 0.89822300  | -2.17039100 | -2.59256900 |
| F  | -2.23042400 | -4.87703600 | 4.16744300  |
| F  | 1.01452500  | 4.24270800  | 4.81308000  |
| F  | 8.08651800  | -3.40814400 | -2.62724900 |
| F  | 5.24633900  | 5.37696600  | -0.92722100 |
| H  | -3.77768100 | 2.64970900  | 2.03107400  |
| H  | -3.09678200 | 1.34739300  | 1.03114000  |
| H  | -4.17226700 | 3.05894600  | -4.67760100 |
| H  | -3.30421300 | 1.68738200  | -3.95887700 |
| Fe | -2.37459000 | -0.07336000 | -1.13095500 |
| H  | -1.38493400 | 1.18980500  | -1.22249500 |

**C2H4** Gsolv= -78.487958

|   |            |             |             |
|---|------------|-------------|-------------|
| C | 0.00000000 | 0.66346200  | 0.00001200  |
| C | 0.00000000 | -0.66346200 | 0.00001200  |
| H | 0.00000000 | 1.23772300  | 0.92485100  |
| H | 0.00000000 | -1.23772300 | 0.92485100  |
| H | 0.00000000 | 1.23804700  | -0.92492100 |
| H | 0.00000000 | -1.23804700 | -0.92492100 |

**CH2=CHCH2CH3** Gsolv= -157.008870

|   |             |             |             |
|---|-------------|-------------|-------------|
| C | -1.84951400 | 0.01578000  | -0.27374800 |
| C | -0.71085600 | -0.29571700 | 0.33913100  |
| H | -2.72655100 | -0.62592500 | -0.22290400 |
| H | -0.64848200 | -1.22993000 | 0.90514600  |
| H | -1.94903700 | 0.93460700  | -0.85239200 |
| C | 0.53795000  | 0.52539000  | 0.30179300  |
| H | 0.35604700  | 1.44373800  | -0.27370000 |
| H | 0.79793200  | 0.84344000  | 1.32299600  |
| C | 1.71071600  | -0.24707200 | -0.29111700 |

|   |            |             |             |
|---|------------|-------------|-------------|
| H | 2.62860700 | 0.35137400  | -0.29085300 |
| H | 1.91064400 | -1.16224400 | 0.28058400  |
| H | 1.50106600 | -0.54534800 | -1.32523000 |

**CH<sub>2</sub>=CHCH<sub>3</sub>** G<sub>solv</sub>= -117.752485

|   |             |             |             |
|---|-------------|-------------|-------------|
| C | 1.27535500  | -0.22019000 | 0.00000100  |
| C | 0.13045600  | 0.45728500  | -0.00000200 |
| H | 2.24077500  | 0.28105500  | 0.00000300  |
| H | 0.16296400  | 1.54918700  | -0.00000300 |
| H | 1.28968900  | -1.31044700 | -0.00000400 |
| C | -1.22504000 | -0.16289100 | -0.00000000 |
| H | -1.80625300 | 0.14618000  | -0.87885400 |
| H | -1.16557600 | -1.25733800 | -0.00002600 |
| H | -1.80622400 | 0.14614000  | 0.87889100  |

**CH<sub>3</sub>CH<sub>2</sub>CH<sub>2</sub>CH<sub>2</sub>CH<sub>2</sub>CH<sub>3</sub>** G<sub>solv</sub>= -275.994044

|   |             |             |             |
|---|-------------|-------------|-------------|
| C | -2.54282500 | 0.49467400  | 0.00007400  |
| H | -2.53945400 | 1.15894100  | -0.87789600 |
| H | -2.53943700 | 1.15873700  | 0.87819800  |
| C | -1.27081400 | -0.33968900 | -0.00003400 |
| H | -1.27177400 | -1.00610600 | 0.87859800  |
| H | -1.27184600 | -1.00598500 | -0.87875800 |
| C | -3.80166600 | -0.35472100 | -0.00001300 |
| H | -4.71112500 | 0.25690800  | 0.00009500  |
| H | -3.84004900 | -1.00473900 | -0.88398700 |
| H | -3.84000600 | -1.00498700 | 0.88378100  |
| C | -0.00003800 | 0.49491900  | -0.00003200 |
| H | -0.00003800 | 1.16096100  | 0.87878300  |
| H | -0.00001400 | 1.16092500  | -0.87887500 |
| C | 1.27080300  | -0.33970000 | 0.00000200  |
| H | 1.27175800  | -1.00615400 | -0.87863900 |
| H | 1.27176300  | -1.00606300 | 0.87871000  |
| C | 2.54279300  | 0.49461200  | -0.00004400 |
| H | 2.53938400  | 1.15890000  | 0.87794500  |
| H | 2.53941000  | 1.15876300  | -0.87813600 |
| C | 3.80173500  | -0.35467500 | 0.00004400  |
| H | 3.84018100  | -1.00489600 | -0.88379700 |
| H | 4.71115700  | 0.25703100  | 0.00000900  |
| H | 3.84015400  | -1.00475700 | 0.88398700  |

**CH<sub>3</sub>CH<sub>2</sub>CH<sub>2</sub>CH<sub>2</sub>CH<sub>3</sub>** G<sub>solv</sub>= -197.479521

|   |             |            |             |
|---|-------------|------------|-------------|
| C | -1.27213700 | 0.52416900 | 0.00003500  |
| H | -1.26882800 | 1.18839500 | -0.87798700 |
| H | -1.26883200 | 1.18830300 | 0.87812600  |



|   |             |             |             |
|---|-------------|-------------|-------------|
| C | 0.00004900  | -0.30991100 | -0.00000100 |
| H | 0.00002300  | -0.97667700 | 0.87856700  |
| H | -0.00003300 | -0.97667300 | -0.87857400 |
| C | -2.53102100 | -0.32518100 | -0.00001400 |
| H | -3.44061300 | 0.28629000  | 0.00004900  |
| H | -2.56934700 | -0.97527300 | -0.88392200 |
| H | -2.56932100 | -0.97541300 | 0.88379300  |
| C | 1.27196200  | 0.52406200  | -0.00003500 |
| H | 1.26849600  | 1.18839600  | 0.87793900  |
| H | 1.26850900  | 1.18826400  | -0.87810500 |
| C | 2.53114200  | -0.32507500 | 0.00001700  |
| H | 2.56962800  | -0.97547000 | -0.88393900 |
| H | 3.44070600  | 0.28678400  | -0.00004800 |
| H | 2.56964400  | -0.97531100 | 0.88408900  |

**CH3CH2CH2CH3** G<sub>solv</sub>= -158.222358

|   |             |             |             |
|---|-------------|-------------|-------------|
| C | -0.56009900 | -0.51488800 | -0.00001400 |
| H | -0.44793600 | -1.16977600 | 0.87795100  |
| H | -0.44799400 | -1.16971600 | -0.87802800 |
| C | 0.56017400  | 0.51487000  | -0.00002400 |
| H | 0.44773800  | 1.16984700  | -0.87792300 |
| H | 0.44769500  | 1.16992400  | 0.87781400  |
| C | -1.94066200 | 0.11789700  | 0.00002500  |
| H | -2.73858900 | -0.63372200 | -0.00015000 |
| H | -2.08478600 | 0.75313500  | 0.88413700  |
| H | -2.08471000 | 0.75346200  | -0.88386600 |
| C | 1.94073000  | -0.11793200 | 0.00001100  |
| H | 2.08450800  | -0.75343200 | -0.88393200 |
| H | 2.73862800  | 0.63369700  | -0.00017100 |
| H | 2.08459200  | -0.75310000 | 0.88417600  |

**CH3CH2CH3** G<sub>solv</sub>= -118.965062

|   |             |             |             |
|---|-------------|-------------|-------------|
| C | -0.00012200 | 0.58965100  | 0.00000100  |
| H | 0.00018700  | 1.25184300  | 0.87735600  |
| H | 0.00018900  | 1.25174800  | -0.87742300 |
| C | -1.26019800 | -0.258981   | 0.00000200  |
| H | -2.17000000 | 0.35239800  | -0.00004500 |
| H | -1.29775600 | -0.90962600 | -0.88370500 |
| H | -1.29778600 | -0.90954300 | 0.88376700  |
| C | 1.26027000  | -0.25904900 | 0.00000100  |
| H | 2.16987600  | 0.35282100  | -0.00016700 |
| H | 1.29786500  | -0.90954700 | 0.88397900  |
| H | 1.29772000  | -0.90981200 | -0.88378600 |

HCl Gsolv= -460.776010

|    |            |            |             |
|----|------------|------------|-------------|
| Cl | 0.00000000 | 0.00000000 | 0.07148600  |
| H  | 0.00000000 | 0.00000000 | -1.21526600 |

TS2,3 Gsolv= -3933.103653

|   |             |             |             |
|---|-------------|-------------|-------------|
| C | 3.28212100  | 1.50839600  | -2.02877000 |
| C | 4.14968000  | 2.22696900  | -2.84868800 |
| C | 5.49536300  | 1.86801600  | -2.89642300 |
| C | 5.96293500  | 0.78544500  | -2.14576800 |
| C | 5.07237700  | 0.08764500  | -1.33907500 |
| N | 3.75942800  | 0.46443200  | -1.28153400 |
| H | 6.18146000  | 2.42289700  | -3.53059800 |
| H | 3.78078900  | 3.05471000  | -3.44934200 |
| H | 7.00915800  | 0.49364600  | -2.19494300 |
| C | 5.29409600  | -1.10188500 | -0.55622400 |
| C | 1.85975800  | 1.63310400  | -1.89143600 |
| C | 6.59292600  | -1.83575800 | -0.55666100 |
| H | 7.26292500  | -1.46429900 | -1.33653800 |
| H | 7.11507100  | -1.74059200 | 0.40478000  |
| H | 6.43941500  | -2.90846800 | -0.72474300 |
| C | 1.05458200  | 2.52146800  | -2.77612500 |
| H | 0.15421900  | 2.88790000  | -2.27123200 |
| H | 1.63455000  | 3.39132000  | -3.10042800 |
| H | 0.73220400  | 1.98189700  | -3.67848100 |
| N | 4.21157500  | -1.51206300 | 0.08919000  |
| N | 1.33538800  | 0.79036700  | -0.99802600 |
| C | 4.23927200  | -2.77968100 | 0.74051900  |
| C | 4.67488800  | -2.91028100 | 2.06881900  |
| C | 3.75384600  | -3.88645400 | 0.02141000  |
| C | 4.57814300  | -4.16533700 | 2.67456300  |
| C | 3.67033200  | -5.11948800 | 0.66639400  |
| C | 4.07114500  | -5.26149400 | 1.98932100  |
| H | 4.91268600  | -4.27405600 | 3.70576700  |
| H | 3.28540300  | -5.97668000 | 0.11499800  |
| H | 3.99729100  | -6.22798200 | 2.48294200  |
| C | -0.07337300 | 0.62944800  | -0.98584300 |
| C | -0.63945600 | -0.24552200 | -1.91100300 |
| C | -0.92941100 | 1.21644600  | -0.03708100 |
| C | -1.97954100 | -0.59149200 | -1.91998600 |
| C | -2.28496300 | 0.89856700  | -0.06872600 |
| C | -2.82386000 | -0.01339300 | -0.97762400 |
| H | -2.33421800 | -1.30944500 | -2.65581300 |
| H | -2.94610600 | 1.33551900  | 0.68003300  |
| C | 5.23702400  | -1.75245600 | 2.84100000  |

|   |             |             |             |
|---|-------------|-------------|-------------|
| H | 5.92108800  | -1.14021300 | 2.24158100  |
| C | 3.36114500  | -3.74748600 | -1.41856500 |
| H | 4.24095500  | -3.74743300 | -2.07786000 |
| C | -0.37020900 | 2.20124000  | 0.97559600  |
| H | 0.65069400  | 1.86039400  | 1.19878700  |
| C | -4.28596600 | -0.39735200 | -0.82511600 |
| H | -4.85045100 | 0.54726200  | -0.76110200 |
| C | -0.22419300 | 3.57750400  | 0.35221900  |
| C | -1.29856700 | 4.20195200  | -0.28925300 |
| C | 1.00014600  | 4.24490500  | 0.40362300  |
| C | -1.15682700 | 5.45467800  | -0.87381900 |
| H | -2.26124800 | 3.69442400  | -0.33935600 |
| C | 1.16506200  | 5.49774600  | -0.17943400 |
| H | 1.84609300  | 3.77099500  | 0.90049100  |
| C | 0.07949600  | 6.07928700  | -0.81122800 |
| H | -1.98246600 | 5.95011700  | -1.37744100 |
| H | 2.11604500  | 6.02255200  | -0.15124700 |
| C | -1.12800300 | 2.19648900  | 2.29677800  |
| C | -1.53064400 | 3.36799600  | 2.93737400  |
| C | -1.40106800 | 0.97420800  | 2.92673100  |
| C | -2.19178200 | 3.33142800  | 4.16330600  |
| H | -1.32613500 | 4.33355500  | 2.48031600  |
| C | -2.06588500 | 0.91519600  | 4.14264700  |
| H | -1.10243300 | 0.04340700  | 2.44448700  |
| C | -2.45168500 | 2.10403500  | 4.74343200  |
| H | -2.50769700 | 4.24097000  | 4.66704100  |
| H | -2.29325800 | -0.03324100 | 4.62239500  |
| C | -4.83484300 | -1.14489200 | -2.02536500 |
| C | -4.87361500 | -2.53894500 | -2.08145800 |
| C | -5.26236300 | -0.41979400 | -3.14092200 |
| C | -5.33107300 | -3.19874900 | -3.21773000 |
| H | -4.54689400 | -3.12255400 | -1.22249700 |
| C | -5.72509100 | -1.05900700 | -4.28403300 |
| H | -5.22823400 | 0.66915200  | -3.11308200 |
| C | -5.75061700 | -2.44450400 | -4.30004000 |
| H | -5.36986000 | -4.28325700 | -3.27268400 |
| H | -6.06576400 | -0.50546200 | -5.15479700 |
| C | -4.52799500 | -1.12446500 | 0.48823700  |
| C | -3.55792400 | -1.93949600 | 1.07689000  |
| C | -5.76746400 | -0.99987600 | 1.11995000  |
| C | -3.81075700 | -2.60873100 | 2.27007600  |
| H | -2.58414900 | -2.05164000 | 0.60073900  |
| C | -6.03884100 | -1.65719600 | 2.31352900  |
| H | -6.53467700 | -0.37180400 | 0.66784800  |

|    |             |             |             |
|----|-------------|-------------|-------------|
| C  | -5.04911800 | -2.45162500 | 2.86952700  |
| H  | -3.06344100 | -3.24383000 | 2.73832200  |
| H  | -6.99574000 | -1.55922100 | 2.81885400  |
| F  | 0.17033200  | -0.81199200 | -2.82113300 |
| F  | 0.22611100  | 7.28312600  | -1.38142800 |
| F  | -3.09642600 | 2.05964900  | 5.91768700  |
| F  | -6.19844400 | -3.07205400 | -5.39595800 |
| F  | -5.29766200 | -3.08534600 | 4.02374200  |
| C  | 1.09690300  | -1.79160700 | 0.62836600  |
| H  | 1.34514900  | -2.58120300 | 1.34242200  |
| H  | 1.04430100  | -2.25805500 | -0.37607000 |
| H  | 5.78795000  | -2.10759100 | 3.71844900  |
| H  | 4.45108400  | -1.07612300 | 3.20078600  |
| H  | 2.71490300  | -4.57285500 | -1.73515500 |
| H  | 2.83659200  | -2.80154600 | -1.60547200 |
| H  | 0.10412900  | -1.38300100 | 0.84107200  |
| Fe | 2.62278600  | -0.39334300 | -0.11764900 |
| C  | 2.98673400  | 0.67817300  | 1.49216900  |
| C  | 2.11488500  | -0.39839000 | 1.80709700  |
| H  | 1.12366500  | -0.11823400 | 2.17168800  |
| H  | 2.52598000  | -1.20248200 | 2.42010400  |
| H  | 4.04014000  | 0.63799400  | 1.78118200  |
| H  | 2.60007300  | 1.69996100  | 1.44999600  |

TS3,4 Gsolv= -3933.129786

|   |             |             |             |
|---|-------------|-------------|-------------|
| C | 3.20817500  | 1.44948100  | -1.84374200 |
| C | 4.01951600  | 2.17442800  | -2.71841200 |
| C | 5.39571600  | 1.97975800  | -2.69801700 |
| C | 5.93661600  | 0.97472200  | -1.88328100 |
| C | 5.10303800  | 0.27606300  | -1.02406700 |
| N | 3.78520300  | 0.63590100  | -0.89662400 |
| H | 6.03838700  | 2.54079000  | -3.37032700 |
| H | 3.57367500  | 2.86162400  | -3.43438100 |
| H | 6.99013300  | 0.71915200  | -1.96279500 |
| C | 5.40376900  | -0.94261600 | -0.31527900 |
| C | 1.78890200  | 1.33243700  | -1.86506300 |
| C | 6.76179800  | -1.56238000 | -0.33782600 |
| H | 6.75408000  | -2.46798100 | -0.95990900 |
| H | 7.51598700  | -0.88308400 | -0.74164000 |
| H | 7.08841400  | -1.87505900 | 0.65918500  |
| C | 0.97005400  | 1.93261100  | -2.95736000 |
| H | 0.82678800  | 1.18663100  | -3.75339700 |
| H | -0.02348000 | 2.24033700  | -2.62201600 |
| H | 1.46013300  | 2.80331100  | -3.40193600 |

|   |             |             |             |
|---|-------------|-------------|-------------|
| N | 4.34946100  | -1.51341500 | 0.24302900  |
| N | 1.29963400  | 0.48833600  | -0.94678700 |
| C | 4.49115900  | -2.77906600 | 0.88002900  |
| C | 5.01079800  | -2.89791700 | 2.18130900  |
| C | 4.04026300  | -3.90710900 | 0.17151000  |
| C | 5.07120000  | -4.17118500 | 2.75312800  |
| C | 4.12091200  | -5.15771000 | 0.78128700  |
| C | 4.63158000  | -5.29459700 | 2.06628700  |
| H | 5.47434300  | -4.27146100 | 3.76031700  |
| H | 3.77365400  | -6.03279600 | 0.23324600  |
| H | 4.68830500  | -6.27620100 | 2.53151700  |
| C | -0.10039200 | 0.27441300  | -0.93422700 |
| C | -0.60367600 | -0.82461500 | -1.62727700 |
| C | -1.01950900 | 1.10436200  | -0.25643500 |
| C | -1.94658100 | -1.15733900 | -1.66155800 |
| C | -2.37566400 | 0.79703700  | -0.34121400 |
| C | -2.85417100 | -0.33413000 | -1.00419300 |
| H | -2.25608000 | -2.05043700 | -2.19961800 |
| H | -3.09365700 | 1.42363900  | 0.18762800  |
| C | 5.48145400  | -1.71167200 | 2.97259700  |
| H | 6.09061600  | -1.01563100 | 2.38452200  |
| C | 3.47746600  | -3.75825900 | -1.20763100 |
| H | 4.19039300  | -3.28831800 | -1.89799500 |
| C | -0.52374500 | 2.30507500  | 0.54165400  |
| H | 0.46236600  | 2.00627100  | 0.93372500  |
| C | -4.32488800 | -0.67902500 | -0.85849300 |
| H | -4.88559000 | 0.25342500  | -1.03540900 |
| C | -0.25511900 | 3.50181600  | -0.35306700 |
| C | -1.26981200 | 4.06536700  | -1.13187100 |
| C | 1.01903200  | 4.06778100  | -0.40222000 |
| C | -1.02046900 | 5.15840400  | -1.95247500 |
| H | -2.27139200 | 3.63763100  | -1.09805700 |
| C | 1.29190000  | 5.16012600  | -1.22132600 |
| H | 1.81839600  | 3.63787700  | 0.20169200  |
| C | 0.26265800  | 5.68467100  | -1.98427900 |
| H | -1.79811400 | 5.60641500  | -2.56509400 |
| H | 2.28286800  | 5.60333800  | -1.27360000 |
| C | -1.38682400 | 2.66847200  | 1.75104400  |
| C | -1.52141800 | 3.99785500  | 2.16244100  |
| C | -1.99507700 | 1.68163400  | 2.54002900  |
| C | -2.24021900 | 4.34032900  | 3.30359400  |
| H | -1.05508900 | 4.79292300  | 1.58544300  |
| C | -2.72189100 | 2.00245600  | 3.67898400  |
| H | -1.91668200 | 0.63392300  | 2.25847000  |

|    |             |             |             |
|----|-------------|-------------|-------------|
| C  | -2.83342000 | 3.33392500  | 4.04333700  |
| H  | -2.34520600 | 5.37444600  | 3.62035600  |
| H  | -3.20142000 | 1.23509800  | 4.28094200  |
| C  | -4.80926600 | -1.67831600 | -1.89138900 |
| C  | -4.84589600 | -3.05046400 | -1.63732000 |
| C  | -5.17633500 | -1.22411800 | -3.16082800 |
| C  | -5.24316000 | -3.95150500 | -2.62003200 |
| H  | -4.56333600 | -3.42397900 | -0.65440900 |
| C  | -5.57930100 | -2.10684200 | -4.15486800 |
| H  | -5.14338000 | -0.15605200 | -3.37453900 |
| C  | -5.60522500 | -3.46130800 | -3.86313600 |
| H  | -5.27864900 | -5.02149200 | -2.43419200 |
| H  | -5.87345400 | -1.76454500 | -5.14332200 |
| C  | -4.64613300 | -1.10299000 | 0.56771800  |
| C  | -3.68940100 | -1.66634900 | 1.41552300  |
| C  | -5.95112500 | -0.95049600 | 1.04357600  |
| C  | -4.01886600 | -2.05936600 | 2.70971300  |
| H  | -2.66385200 | -1.79310500 | 1.06881300  |
| C  | -6.29964300 | -1.33396200 | 2.33213100  |
| H  | -6.70891500 | -0.52042200 | 0.38896900  |
| C  | -5.32075500 | -1.88251400 | 3.14588300  |
| H  | -3.28134400 | -2.49523600 | 3.37865200  |
| H  | -7.30913500 | -1.21136500 | 2.71499900  |
| F  | 0.26166800  | -1.59887100 | -2.29651500 |
| F  | 0.51150600  | 6.73459800  | -2.77901100 |
| F  | -3.53571000 | 3.65415000  | 5.13870700  |
| F  | -5.99606200 | -4.32186600 | -4.81291000 |
| F  | -5.64522700 | -2.24991400 | 4.39285800  |
| H  | 6.08303100  | -2.03627600 | 3.82821300  |
| H  | 4.64132400  | -1.12669000 | 3.36953600  |
| H  | 3.19503300  | -4.73073600 | -1.62419500 |
| H  | 2.58734300  | -3.11403400 | -1.20058700 |
| Fe | 2.68441900  | -0.35606200 | 0.23162000  |
| C  | 2.97286800  | 0.66006400  | 1.89186100  |
| C  | 2.19001200  | -0.51843300 | 2.16064100  |
| H  | 2.72606000  | -1.35433500 | 2.62215300  |
| H  | 4.03511500  | 0.69911600  | 2.13787300  |
| H  | 2.47239500  | 1.63189300  | 1.93223400  |
| H  | 1.71709200  | -1.46007700 | 0.86835200  |
| C  | 0.80519900  | -0.35754700 | 2.73294000  |
| H  | 0.31749800  | 0.53117600  | 2.32323900  |
| H  | 0.15619800  | -1.22070100 | 2.52617700  |
| H  | 0.85195800  | -0.21875900 | 3.82157100  |

TS5,6 Gsolv= -4011.620463

|   |             |             |             |
|---|-------------|-------------|-------------|
| C | 3.15632000  | 1.87659600  | -1.96316900 |
| C | 4.02445000  | 2.70037900  | -2.67991000 |
| C | 5.37777400  | 2.38662700  | -2.75341800 |
| C | 5.86104800  | 1.23953600  | -2.11159900 |
| C | 4.98179700  | 0.43419600  | -1.40556800 |
| N | 3.64339600  | 0.74683200  | -1.33512300 |
| H | 6.05632900  | 3.02643700  | -3.31081500 |
| H | 3.64117200  | 3.58607500  | -3.18173300 |
| H | 6.91529300  | 0.97672900  | -2.16842900 |
| C | 5.25429800  | -0.80935200 | -0.75301600 |
| C | 1.74939800  | 1.97951300  | -1.81177500 |
| C | 6.60028800  | -1.45155800 | -0.83886300 |
| H | 6.86079600  | -1.68000100 | -1.88090500 |
| H | 7.37947200  | -0.78022100 | -0.45590200 |
| H | 6.64688500  | -2.38341000 | -0.26960200 |
| C | 0.92338000  | 2.95612100  | -2.57801200 |
| H | 0.06793200  | 3.31335500  | -1.99340100 |
| H | 1.51108600  | 3.83020900  | -2.87534900 |
| H | 0.52469300  | 2.49750600  | -3.49483400 |
| N | 4.18697800  | -1.34022700 | -0.16386200 |
| N | 1.23137500  | 1.03221200  | -1.01235100 |
| C | 4.27498100  | -2.67205200 | 0.33702300  |
| C | 4.70496200  | -2.93007700 | 1.65028800  |
| C | 3.87642300  | -3.71985600 | -0.51192600 |
| C | 4.66752100  | -4.24643000 | 2.11465000  |
| C | 3.84368700  | -5.01914200 | -0.00409200 |
| C | 4.22388100  | -5.28513600 | 1.30520700  |
| H | 4.99841100  | -4.45099500 | 3.13227600  |
| H | 3.51900300  | -5.82967800 | -0.65607500 |
| H | 4.19127100  | -6.30223100 | 1.68933500  |
| C | -0.17786900 | 0.89145100  | -1.00039500 |
| C | -0.76578400 | 0.10265600  | -1.98933400 |
| C | -1.01590900 | 1.38026100  | 0.01965900  |
| C | -2.09726900 | -0.27523200 | -1.98104000 |
| C | -2.36616400 | 1.03809600  | 0.00454000  |
| C | -2.91482900 | 0.18701700  | -0.95492100 |
| H | -2.46304700 | -0.93968500 | -2.76062200 |
| H | -3.00798300 | 1.38502900  | 0.81485800  |
| C | 5.22717600  | -1.83790200 | 2.53594500  |
| H | 5.98441700  | -1.22553800 | 2.03023400  |
| C | 3.53159000  | -3.45788700 | -1.94744000 |
| H | 4.43868100  | -3.34218300 | -2.55787700 |
| C | -0.44081500 | 2.27491400  | 1.10437900  |

|   |             |             |             |
|---|-------------|-------------|-------------|
| H | 0.59827100  | 1.94608900  | 1.24756200  |
| C | -4.33234900 | -0.31051500 | -0.74038800 |
| H | -4.94198200 | 0.57125700  | -0.48393500 |
| C | -0.35542100 | 3.71110900  | 0.62034900  |
| C | -1.47070800 | 4.36685400  | 0.09007700  |
| C | 0.85378200  | 4.40367900  | 0.69166000  |
| C | -1.38290500 | 5.67497100  | -0.37035800 |
| H | -2.42250000 | 3.84079200  | 0.02666300  |
| C | 0.96472100  | 5.71243900  | 0.23193400  |
| H | 1.73117300  | 3.90606200  | 1.10348100  |
| C | -0.15975800 | 6.32372000  | -0.29496300 |
| H | -2.24037700 | 6.19517500  | -0.78855100 |
| H | 1.90369400  | 6.25747800  | 0.27450500  |
| C | -1.13351900 | 2.11970200  | 2.45263200  |
| C | -1.46664100 | 3.21542100  | 3.24962400  |
| C | -1.39962100 | 0.83790400  | 2.95498100  |
| C | -2.04980000 | 3.04919400  | 4.50364600  |
| H | -1.26713900 | 4.22370100  | 2.89381000  |
| C | -1.98519400 | 0.65044400  | 4.19882000  |
| H | -1.16454400 | -0.03843700 | 2.35038900  |
| C | -2.30122900 | 1.76760200  | 4.95659100  |
| H | -2.31120500 | 3.90009900  | 5.12690700  |
| H | -2.20356200 | -0.34270900 | 4.58220900  |
| C | -4.94867000 | -0.91615800 | -1.98661900 |
| C | -4.92580100 | -2.28911700 | -2.23689400 |
| C | -5.50758300 | -0.07075400 | -2.94882200 |
| C | -5.45176400 | -2.81224400 | -3.41403200 |
| H | -4.49453200 | -2.96441900 | -1.49975700 |
| C | -6.04046500 | -0.57307600 | -4.12899700 |
| H | -5.52231000 | 1.00388700  | -2.76856300 |
| C | -6.00220100 | -1.94239900 | -4.33956600 |
| H | -5.44347600 | -3.87913600 | -3.61978300 |
| H | -6.48352900 | 0.07389300  | -4.88119900 |
| C | -4.39865600 | -1.23786700 | 0.46569900  |
| C | -3.29685300 | -1.97698600 | 0.90307700  |
| C | -5.60748400 | -1.37867700 | 1.15194900  |
| C | -3.38843100 | -2.82798200 | 2.00048200  |
| H | -2.34222300 | -1.88394300 | 0.38446800  |
| C | -5.72006300 | -2.21992500 | 2.25167800  |
| H | -6.47820100 | -0.81515500 | 0.81738900  |
| C | -4.60203200 | -2.93091400 | 2.65894000  |
| H | -2.53452100 | -3.40682100 | 2.34588800  |
| H | -6.65311100 | -2.32918200 | 2.79768900  |
| F | 0.01995100  | -0.36516400 | -2.97246800 |



|    |             |             |             |
|----|-------------|-------------|-------------|
| F  | -0.06559300 | 7.58179700  | -0.74661800 |
| F  | -2.86887800 | 1.59838000  | 6.15874300  |
| F  | -6.51684200 | -2.43869900 | -5.47274800 |
| F  | -4.69982900 | -3.74033300 | 3.72203600  |
| C  | 1.12336700  | -1.54607500 | 0.39751400  |
| H  | 1.43476100  | -1.85545300 | -0.63375200 |
| H  | 5.68663200  | -2.25982400 | 3.43602000  |
| H  | 4.43879800  | -1.14872300 | 2.86291300  |
| H  | 2.95649000  | -4.28618200 | -2.37543800 |
| H  | 2.95908100  | -2.53066000 | -2.07441400 |
| H  | 0.13095400  | -1.08679700 | 0.30969600  |
| Fe | 2.55434800  | -0.23224100 | -0.25082100 |
| C  | 2.93608600  | 0.73007700  | 1.40165200  |
| C  | 2.03039900  | -0.33806400 | 1.74671000  |
| H  | 1.04545500  | -0.05214400 | 2.12619600  |
| H  | 2.44690300  | -1.16164200 | 2.32870600  |
| H  | 3.98150700  | 0.64766000  | 1.70937600  |
| H  | 2.56885100  | 1.75982900  | 1.41980500  |
| C  | 1.00101600  | -2.79804200 | 1.24305700  |
| H  | 1.99076800  | -3.19043700 | 1.51238900  |
| H  | 0.49805100  | -2.54605400 | 2.19130000  |
| C  | 0.21324800  | -3.88388700 | 0.52412500  |
| H  | -0.77811200 | -3.52661500 | 0.20918600  |
| H  | 0.73929300  | -4.21319000 | -0.38219700 |
| H  | 0.06681400  | -4.76610800 | 1.15947300  |

**TS6,7** Gsolv= -4011.631314

|   |             |             |             |
|---|-------------|-------------|-------------|
| C | 3.18015300  | 1.70297700  | -1.85931100 |
| C | 3.96377200  | 2.56293200  | -2.62448500 |
| C | 5.35191900  | 2.42728200  | -2.57964500 |
| C | 5.93879800  | 1.40628200  | -1.82750400 |
| C | 5.11972100  | 0.56634000  | -1.07989500 |
| N | 3.77264500  | 0.77236400  | -1.06113000 |
| H | 5.97902700  | 3.09614900  | -3.16308300 |
| H | 3.50440500  | 3.32129100  | -3.25388900 |
| H | 7.01623800  | 1.26249300  | -1.84367200 |
| C | 5.46396000  | -0.64376500 | -0.36969300 |
| C | 1.74528900  | 1.56746300  | -1.83454800 |
| C | 6.84005700  | -1.21920300 | -0.41244200 |
| H | 6.88152000  | -2.07122500 | -1.10580900 |
| H | 7.57205000  | -0.48114700 | -0.75110700 |
| H | 7.16316600  | -1.59474200 | 0.56390200  |
| C | 0.90357800  | 2.21045300  | -2.88337800 |
| H | -0.10205500 | 2.45273000  | -2.52994800 |

|   |             |             |             |
|---|-------------|-------------|-------------|
| H | 1.36271600  | 3.13041200  | -3.25693100 |
| H | 0.79579300  | 1.52616200  | -3.73829300 |
| N | 4.42098400  | -1.25244000 | 0.17613600  |
| N | 1.29614800  | 0.68827500  | -0.93642000 |
| C | 4.61173400  | -2.55205700 | 0.73624000  |
| C | 5.08686800  | -2.72345600 | 2.04667600  |
| C | 4.25740700  | -3.65449600 | -0.06080900 |
| C | 5.19176900  | -4.02477300 | 2.54455200  |
| C | 4.37582700  | -4.93499900 | 0.47752400  |
| C | 4.83751500  | -5.12427200 | 1.77461500  |
| H | 5.55983300  | -4.16590900 | 3.56021300  |
| H | 4.09913500  | -5.79111400 | -0.13665400 |
| H | 4.92394300  | -6.12840900 | 2.18379300  |
| C | -0.10148400 | 0.43044100  | -0.95332300 |
| C | -0.56702900 | -0.61608400 | -1.74577600 |
| C | -1.04797500 | 1.16961700  | -0.21460400 |
| C | -1.90003300 | -0.98393900 | -1.82196800 |
| C | -2.39344800 | 0.83106900  | -0.33715700 |
| C | -2.83665400 | -0.24543200 | -1.10721800 |
| H | -2.17909900 | -1.82987100 | -2.44595300 |
| H | -3.13327200 | 1.39387000  | 0.23168200  |
| C | 5.46748000  | -1.56209500 | 2.91812400  |
| H | 6.06972800  | -0.81304600 | 2.39032200  |
| C | 3.75976400  | -3.44612900 | -1.45757500 |
| H | 4.51948900  | -2.98014300 | -2.10029300 |
| C | -0.59784400 | 2.32394900  | 0.67198800  |
| H | 0.39433200  | 2.03533200  | 1.05202700  |
| C | -4.31436900 | -0.59914000 | -1.05392900 |
| H | -4.86298300 | 0.33667000  | -1.24916600 |
| C | -0.36599900 | 3.58497800  | -0.14149800 |
| C | -1.39607600 | 4.16810100  | -0.88512900 |
| C | 0.89327100  | 4.18569900  | -0.15783900 |
| C | -1.17694200 | 5.31535900  | -1.63764000 |
| H | -2.38632400 | 3.71363300  | -0.87719300 |
| C | 1.13581300  | 5.33291200  | -0.90868100 |
| H | 1.70479300  | 3.74200900  | 0.41918900  |
| C | 0.09185000  | 5.87603700  | -1.63786500 |
| H | -1.96738000 | 5.77945000  | -2.22121100 |
| H | 2.11452200  | 5.80479400  | -0.93344500 |
| C | -1.48001600 | 2.56354400  | 1.89695400  |
| C | -1.67503300 | 3.85297800  | 2.39938500  |
| C | -2.04643900 | 1.49639400  | 2.60911500  |
| C | -2.41227600 | 4.08162200  | 3.55730200  |
| H | -1.24184700 | 4.70601700  | 1.88225300  |

|    |             |             |             |
|----|-------------|-------------|-------------|
| C  | -2.79123200 | 1.70358100  | 3.76263500  |
| H  | -1.92381700 | 0.47555300  | 2.25185300  |
| C  | -2.96258300 | 2.99988100  | 4.21968800  |
| H  | -2.56400700 | 5.08495600  | 3.94601200  |
| H  | -3.23848300 | 0.87550100  | 4.30614500  |
| C  | -4.73299200 | -1.57498400 | -2.13769500 |
| C  | -4.83746900 | -2.94816200 | -1.91284000 |
| C  | -4.96775300 | -1.09079200 | -3.42799000 |
| C  | -5.17193200 | -3.82099500 | -2.94384000 |
| H  | -4.66298100 | -3.34780000 | -0.91569300 |
| C  | -5.30423100 | -1.94454800 | -4.47031100 |
| H  | -4.87994100 | -0.02136200 | -3.61884600 |
| C  | -5.40055900 | -3.30189500 | -4.20605600 |
| H  | -5.26011000 | -4.89152500 | -2.77994100 |
| H  | -5.49376200 | -1.57826600 | -5.47560600 |
| C  | -4.71527600 | -1.04094400 | 0.34352600  |
| C  | -3.86204600 | -1.80179100 | 1.14762800  |
| C  | -5.97403000 | -0.70078600 | 0.84251400  |
| C  | -4.25034300 | -2.21472300 | 2.41758700  |
| H  | -2.87091200 | -2.06991400 | 0.78090600  |
| C  | -6.37937100 | -1.09869100 | 2.11136200  |
| H  | -6.65001600 | -0.10941800 | 0.22568000  |
| C  | -5.50580500 | -1.85194100 | 2.87809500  |
| H  | -3.59624400 | -2.80850200 | 3.05123500  |
| H  | -7.35297000 | -0.83171500 | 2.51313800  |
| F  | 0.32415200  | -1.30077900 | -2.47785200 |
| F  | 0.31168600  | 6.97860900  | -2.36706800 |
| F  | -3.68240400 | 3.21033500  | 5.33025900  |
| F  | -5.72828400 | -4.13466700 | -5.20320700 |
| F  | -5.88433100 | -2.23806800 | 4.10382400  |
| H  | 6.04385400  | -1.90399900 | 3.78431500  |
| H  | 4.58263500  | -1.03597500 | 3.29938900  |
| H  | 3.46374100  | -4.39359400 | -1.91926900 |
| H  | 2.89240600  | -2.77007100 | -1.45994500 |
| Fe | 2.70135100  | -0.36438900 | -0.02745800 |
| C  | 2.84763100  | 0.57822900  | 1.69364100  |
| C  | 2.17103500  | -0.66444500 | 1.86966400  |
| H  | 2.75714600  | -1.48853600 | 2.28857400  |
| H  | 3.88813900  | 0.70119900  | 2.00399000  |
| H  | 2.26698300  | 1.50360600  | 1.76550900  |
| H  | 1.90785800  | -1.48659700 | 0.23903800  |
| C  | 0.73919000  | -0.69892700 | 2.33423400  |
| H  | 0.21553900  | 0.18732800  | 1.95772300  |
| H  | 0.74140100  | -0.59551200 | 3.43432900  |

|   |             |             |            |
|---|-------------|-------------|------------|
| C | -0.05503900 | -1.94680100 | 1.96821100 |
| H | -1.05743500 | -1.86652400 | 2.41978800 |
| H | -0.20737200 | -1.97205400 | 0.87666900 |
| C | 0.60447100  | -3.23922900 | 2.42146100 |
| H | -0.04015600 | -4.10766000 | 2.24125000 |
| H | 1.54780400  | -3.41629800 | 1.88852900 |
| H | 0.83246900  | -3.21214000 | 3.49625900 |

**TS8,9** Gsolv= -4090.136838

|   |             |             |             |
|---|-------------|-------------|-------------|
| C | 3.15753500  | 2.16781400  | -1.89242600 |
| C | 4.02576600  | 3.02521200  | -2.56862800 |
| C | 5.37004100  | 2.69198400  | -2.69887500 |
| C | 5.84416700  | 1.49193700  | -2.15438600 |
| C | 4.96498800  | 0.65400100  | -1.48752200 |
| N | 3.63534500  | 0.98529100  | -1.36153000 |
| H | 6.04853400  | 3.35790100  | -3.22487600 |
| H | 3.64922300  | 3.95242100  | -2.99490600 |
| H | 6.89106600  | 1.21359400  | -2.25568300 |
| C | 5.22894700  | -0.63749900 | -0.93177000 |
| C | 1.75726900  | 2.28670000  | -1.69912100 |
| C | 6.56044400  | -1.29440900 | -1.09645900 |
| H | 6.78414400  | -1.46862600 | -2.15740600 |
| H | 7.36237800  | -0.65707600 | -0.70280500 |
| H | 6.60942200  | -2.25715100 | -0.58140000 |
| C | 0.93525900  | 3.33374200  | -2.37117400 |
| H | 0.09832400  | 3.66109500  | -1.74374300 |
| H | 1.53427300  | 4.21729600  | -2.61293300 |
| H | 0.51039700  | 2.95438700  | -3.31213800 |
| N | 4.16670100  | -1.19030700 | -0.35404200 |
| N | 1.23751600  | 1.29243100  | -0.95974600 |
| C | 4.24684700  | -2.55162800 | 0.06167500  |
| C | 4.70856900  | -2.89460200 | 1.34445800  |
| C | 3.80695000  | -3.54046700 | -0.83628900 |
| C | 4.66247500  | -4.23579600 | 1.73058900  |
| C | 3.76481200  | -4.86703900 | -0.40538700 |
| C | 4.17879900  | -5.21730100 | 0.87395000  |
| H | 5.01800700  | -4.50619800 | 2.72425400  |
| H | 3.40347200  | -5.63167500 | -1.09318900 |
| H | 4.13960000  | -6.25513100 | 1.19767400  |
| C | -0.17312600 | 1.17110600  | -0.93241400 |
| C | -0.79149900 | 0.47545900  | -1.97184800 |
| C | -0.98469700 | 1.58585700  | 0.14016100  |
| C | -2.12837600 | 0.11850600  | -1.96876000 |
| C | -2.33988300 | 1.26177100  | 0.12622000  |

|   |             |             |             |
|---|-------------|-------------|-------------|
| C | -2.91882300 | 0.50119200  | -0.88960000 |
| H | -2.51922500 | -0.47337800 | -2.79342100 |
| H | -2.95931600 | 1.54777400  | 0.97677600  |
| C | 5.27042300  | -1.86574600 | 2.28025400  |
| H | 6.01651800  | -1.22738400 | 1.79056700  |
| C | 3.42629600  | -3.18793200 | -2.24289000 |
| H | 4.31771500  | -3.04503800 | -2.87034300 |
| C | -0.37450800 | 2.38709300  | 1.27710300  |
| H | 0.66155700  | 2.03251500  | 1.37344200  |
| C | -4.33018900 | -0.01570300 | -0.68394000 |
| H | -4.92039800 | 0.82256300  | -0.27911700 |
| C | -0.27442200 | 3.85412700  | 0.89978600  |
| C | -1.38744800 | 4.56230300  | 0.43651100  |
| C | 0.94531500  | 4.52364500  | 1.00575600  |
| C | -1.28770500 | 5.90027200  | 0.07485700  |
| H | -2.34697500 | 4.05439300  | 0.34674500  |
| C | 1.06808100  | 5.86184600  | 0.64447600  |
| H | 1.82110100  | 3.98475100  | 1.36620800  |
| C | -0.05483800 | 6.52568300  | 0.18171100  |
| H | -2.14341300 | 6.46158600  | -0.29052700 |
| H | 2.01501100  | 6.39005400  | 0.71435100  |
| C | -1.04353000 | 2.14385400  | 2.62434400  |
| C | -1.34633700 | 3.18462300  | 3.50281400  |
| C | -1.31629200 | 0.83278800  | 3.04074100  |
| C | -1.90565600 | 2.93759800  | 4.75428900  |
| H | -1.14101900 | 4.21294700  | 3.21409900  |
| C | -1.87750500 | 0.56536500  | 4.28130300  |
| H | -1.10570600 | -0.00070800 | 2.37021100  |
| C | -2.16330800 | 1.63022300  | 5.12193900  |
| H | -2.14323400 | 3.74550000  | 5.44103500  |
| H | -2.09922300 | -0.44953600 | 4.60050200  |
| C | -5.00476900 | -0.43888700 | -1.97486500 |
| C | -5.02099500 | -1.76568900 | -2.40794200 |
| C | -5.58162100 | 0.53755000  | -2.79151400 |
| C | -5.60213500 | -2.11645200 | -3.62266900 |
| H | -4.57644000 | -2.54123500 | -1.78636500 |
| C | -6.16966900 | 0.20789800  | -4.00577200 |
| H | -5.56692300 | 1.57809900  | -2.46814800 |
| C | -6.16872400 | -1.12090800 | -4.39977000 |
| H | -5.62408200 | -3.14571300 | -3.97016900 |
| H | -6.62692600 | 0.95763100  | -4.64568800 |
| C | -4.34983700 | -1.10495100 | 0.38087600  |
| C | -3.22221400 | -1.86879200 | 0.68965100  |
| C | -5.54044300 | -1.37405400 | 1.06135800  |

|    |             |             |             |
|----|-------------|-------------|-------------|
| C  | -3.26973900 | -2.86917000 | 1.65605600  |
| H  | -2.28113300 | -1.67865500 | 0.17373100  |
| C  | -5.60950800 | -2.36659100 | 2.03081600  |
| H  | -6.43143700 | -0.79255600 | 0.82534400  |
| C  | -4.46641300 | -3.09860000 | 2.31315700  |
| H  | -2.39218000 | -3.46562700 | 1.90136900  |
| H  | -6.52816800 | -2.57786900 | 2.57135000  |
| F  | -0.03165900 | 0.07937300  | -3.00555100 |
| F  | 0.05090300  | 7.81311600  | -0.17463300 |
| F  | -2.70722300 | 1.38348300  | 6.32163400  |
| F  | -6.73669300 | -1.45120900 | -5.56753300 |
| F  | -4.52271300 | -4.05355100 | 3.25094700  |
| C  | 1.11277500  | -1.37791200 | 0.27098900  |
| H  | 1.38552200  | -1.60541500 | -0.79220100 |
| H  | 5.75477100  | -2.34855000 | 3.13553900  |
| H  | 4.49941400  | -1.19360100 | 2.67688300  |
| H  | 2.82925200  | -3.98242900 | -2.70366100 |
| H  | 2.86192300  | -2.24882100 | -2.29733000 |
| H  | 0.12659300  | -0.89818900 | 0.25232000  |
| Fe | 2.55121600  | -0.04883200 | -0.32337600 |
| C  | 2.99150500  | 0.79376800  | 1.37931900  |
| C  | 2.07771200  | -0.28118000 | 1.67672400  |
| H  | 1.10882400  | -0.00761600 | 2.10402100  |
| H  | 2.49571200  | -1.14999400 | 2.18747700  |
| H  | 4.04317800  | 0.67632900  | 1.65219700  |
| H  | 2.64076300  | 1.82518300  | 1.47219500  |
| C  | 1.00318600  | -2.68913900 | 1.02106000  |
| H  | 1.99646600  | -3.10671900 | 1.24117900  |
| H  | 0.51833100  | -2.51130200 | 1.99737100  |
| C  | 0.19940100  | -3.73089800 | 0.25272400  |
| H  | -0.78613600 | -3.31866500 | -0.02697800 |
| H  | 0.70984000  | -3.94943300 | -0.70075500 |
| C  | 0.00763700  | -5.02680000 | 1.02563900  |
| H  | -0.47806900 | -4.80868000 | 1.99088300  |
| H  | 0.99645300  | -5.44090600 | 1.27763000  |
| C  | -0.80866800 | -6.04938700 | 0.25573800  |
| H  | -0.93883300 | -6.98125400 | 0.81767400  |
| H  | -1.80933200 | -5.66103700 | 0.02158900  |
| H  | -0.32564900 | -6.30134700 | -0.69775600 |
